# Supplementary material for: Diagonal Interactions between Glutamate and Arginine Analogs with Varying Side-Chain Lengths in a β-Hairpin
Source: MDPI journal article supplement (doi:10.3390/molecules28072888), 2023-03-23
Supplement: s1 [file s1]

## Supplementary Materials

### Effect of Charged Amino Acid Side Chain Length on Diagonal Cross Strand Interactions between Carboxylate- and Guanidinium-Containing Residues in a $\beta$ -Hairpin

Nian-Zhi Li, Chen-Hsu Yu, Jhaun-Yu Wu, Shing-Jong Huang, Shou-Ling Huang, Richard P. Cheng\*

#### Tables

|                                                                                                                                            |         |
|--------------------------------------------------------------------------------------------------------------------------------------------|---------|
| <b>Table S1.</b> The Chemical Shift Range and Average Chemical Shift of the $\delta\text{HN}$ and $\delta\text{H}\alpha$ for the Peptides. | S2      |
| <b>Table S2.</b> The Average $^3J_{\text{NH}\alpha}$ Coupling Constant Values of the Strand Residues in the Peptides.                      | S3      |
| <b>Tables S3~S38.</b> The $^1\text{H}$ Chemical Shift Assignments for the Peptides.                                                        | S4~S21  |
| <b>Tables S39~S47.</b> The $^3J_{\text{NH}\alpha}$ Values of the Peptides.                                                                 | S23~S26 |

#### Figures

|                                                                                                                                                  |         |
|--------------------------------------------------------------------------------------------------------------------------------------------------|---------|
| <b>Figure S1.</b> The $\text{H}\alpha$ chemical shift deviations for the residues in the experimental HPDZbbAgx peptides.                        | S27     |
| <b>Figure S2.</b> The $\text{H}\alpha$ chemical shift deviations for the residues in the fully folded reference HPDFZbbAgx peptides.             | S28     |
| <b>Figures S3~S38.</b> The inter-residue NOEs observed involving the side chains of the peptides.                                                | S29~S40 |
| <b>Figures S39~S50.</b> Wüthrich diagrams of the backbone NOE connectivities involving the $\alpha$ -protons and amide protons for the peptides. | S41~S52 |
| <b>Figure S51.</b> The fraction folded population of the residues in the peptides.                                                               | S53     |
| <b>Figure S52.</b> The $\Delta G_{\text{fold}}$ of the residues in the peptides.                                                                 | S54     |

|                             |         |
|-----------------------------|---------|
| <b>Material and Methods</b> | S55~S68 |
|-----------------------------|---------|

|                   |     |
|-------------------|-----|
| <b>References</b> | S69 |
|-------------------|-----|

**Table S1.** The Chemical Shift Range and Average Chemical Shift of the  $\delta\text{HN}$  and  $\delta\text{H}\alpha$  for the HPDFZbbAgx, HPDZbbAgx, and HPDUZbbAgx Peptides.

| Peptide    | $\delta\text{HN}$ Range <sup>a</sup><br>(ppm) | Average $\delta\text{HN}$<br>(ppm) | $\delta\text{H}\alpha$ Range <sup>a</sup><br>(ppm) | Average $\delta\text{H}\alpha$<br>(ppm) |
|------------|-----------------------------------------------|------------------------------------|----------------------------------------------------|-----------------------------------------|
| HPDFAspAgp | 1.144                                         | $8.692 \pm 0.336$                  | 1.319                                              | $4.637 \pm 0.400$                       |
| HPDAspAgp  | 0.645                                         | $8.416 \pm 0.175$                  | 0.946                                              | $4.370 \pm 0.272$                       |
| HPDUAspAgp | 0.573                                         | $8.379 \pm 0.155$                  | 0.701                                              | $4.338 \pm 0.196$                       |
| HPDFAspAgb | 1.167                                         | $8.650 \pm 0.342$                  | 1.424                                              | $4.638 \pm 0.400$                       |
| HPDAspAgb  | 0.562                                         | $8.364 \pm 0.157$                  | 0.899                                              | $4.347 \pm 0.251$                       |
| HPDUAspAgb | 0.499                                         | $8.332 \pm 0.143$                  | 0.688                                              | $4.316 \pm 0.173$                       |
| HPDFAspArg | 1.164                                         | $8.630 \pm 0.335$                  | 1.395                                              | $4.622 \pm 0.393$                       |
| HPDAspArg  | 0.484                                         | $8.337 \pm 0.144$                  | 0.900                                              | $4.340 \pm 0.251$                       |
| HPDUAspArg | 0.431                                         | $8.306 \pm 0.127$                  | 0.733                                              | $4.279 \pm 0.193$                       |
| HPDFAspAgh | 1.105                                         | $8.616 \pm 0.328$                  | 1.088                                              | $4.651 \pm 0.301$                       |
| HPDAspAgh  | 0.445                                         | $8.322 \pm 0.139$                  | 0.891                                              | $4.330 \pm 0.247$                       |
| HPDUAspAgh | 0.297                                         | $8.297 \pm 0.124$                  | 0.700                                              | $4.301 \pm 0.170$                       |
| HPDFGluAgp | 1.109                                         | $8.716 \pm 0.312$                  | 1.411                                              | $4.654 \pm 0.404$                       |
| HPDGluAgp  | 0.653                                         | $8.439 \pm 0.172$                  | 0.992                                              | $4.379 \pm 0.269$                       |
| HPDUGluAgp | 0.359                                         | $8.384 \pm 0.127$                  | 0.700                                              | $4.317 \pm 0.174$                       |
| HPDFGluAgb | 1.226                                         | $8.710 \pm 0.350$                  | 1.477                                              | $4.646 \pm 0.399$                       |
| HPDGluAgb  | 0.633                                         | $8.456 \pm 0.190$                  | 0.975                                              | $4.384 \pm 0.266$                       |
| HPDUGluAgb | 0.318                                         | $8.363 \pm 0.115$                  | 0.491                                              | $4.294 \pm 0.144$                       |
| HPDFGluArg | 1.201                                         | $8.686 \pm 0.348$                  | 1.461                                              | $4.637 \pm 0.395$                       |
| HPDGluArg  | 0.607                                         | $8.417 \pm 0.177$                  | 1.000                                              | $4.368 \pm 0.260$                       |
| HPDUGluArg | 0.343                                         | $8.334 \pm 0.100$                  | 0.525                                              | $4.257 \pm 0.167$                       |
| HPDFGluAgh | 1.217                                         | $8.679 \pm 0.361$                  | 1.452                                              | $4.629 \pm 0.389$                       |
| HPDGluAgh  | 0.606                                         | $8.402 \pm 0.174$                  | 0.969                                              | $4.359 \pm 0.254$                       |
| HPDUGluAgh | 0.362                                         | $8.326 \pm 0.102$                  | 0.498                                              | $4.282 \pm 0.138$                       |
| HPDFAadAgp | 1.168                                         | $8.721 \pm 0.316$                  | 1.437                                              | $4.666 \pm 0.411$                       |
| HPDAadAgp  | 0.660                                         | $8.450 \pm 0.172$                  | 1.010                                              | $4.379 \pm 0.270$                       |
| HPDUAadAgp | 0.376                                         | $8.395 \pm 0.117$                  | 0.702                                              | $4.313 \pm 0.175$                       |
| HPDFAadAgb | 1.242                                         | $8.716 \pm 0.357$                  | 1.503                                              | $4.651 \pm 0.404$                       |
| HPDAadAgb  | 0.734                                         | $8.474 \pm 0.217$                  | 1.019                                              | $4.410 \pm 0.281$                       |
| HPDUAadAgb | 0.320                                         | $8.349 \pm 0.103$                  | 0.493                                              | $4.296 \pm 0.144$                       |
| HPDFAadArg | 1.197                                         | $8.690 \pm 0.349$                  | 1.474                                              | $4.641 \pm 0.395$                       |
| HPDAadArg  | 0.601                                         | $8.409 \pm 0.175$                  | 0.955                                              | $4.370 \pm 0.253$                       |
| HPDUAadArg | 0.260                                         | $8.322 \pm 0.083$                  | 0.500                                              | $4.286 \pm 0.139$                       |
| HPDFAadAgh | 1.218                                         | $8.683 \pm 0.361$                  | 1.455                                              | $4.631 \pm 0.387$                       |
| HPDAadAgh  | 0.620                                         | $8.399 \pm 0.177$                  | 0.948                                              | $4.367 \pm 0.253$                       |
| HPDUAadAgh | 0.275                                         | $8.312 \pm 0.080$                  | 0.499                                              | $4.282 \pm 0.139$                       |

<sup>a</sup>The chemical shift range was the chemical shift difference between the most downfield signal and the most upfield signal for the proton of interest.

**Table S2.** The Average  $^3J_{NH\alpha}$  Coupling Constant Values for the Strand Residues in the HPDFZbbAgx, HPDZbbAgx, and HPDUZbbAgx Peptides.

| Zbb | Agx | HPDFZbbAgx       | HPDZbbAgx        | HPDUZbbAgx       |
|-----|-----|------------------|------------------|------------------|
| Asp | Agp | $10.90 \pm 0.32$ | $9.77 \pm 0.61$  | $9.54 \pm 0.33$  |
| Asp | Agb | $11.00 \pm 0.00$ | $10.56 \pm 0.72$ | $9.50 \pm 0.77$  |
| Asp | Arg | $10.88 \pm 0.77$ | $10.26 \pm 0.61$ | $10.09 \pm 0.51$ |
| Asp | Agh | $12.00 \pm 0.94$ | $10.08 \pm 0.50$ | $9.23 \pm 1.19$  |
| Glu | Agp | $11.13 \pm 0.35$ | $10.46 \pm 0.72$ | $9.76 \pm 0.56$  |
| Glu | Agb | $11.30 \pm 0.48$ | $10.60 \pm 0.52$ | $9.53 \pm 0.32$  |
| Glu | Arg | $11.98 \pm 1.52$ | $10.14 \pm 1.08$ | $10.08 \pm 0.72$ |
| Glu | Agh | $11.30 \pm 0.48$ | $9.94 \pm 0.78$  | $9.05 \pm 0.79$  |
| Aad | Agp | $10.63 \pm 0.52$ | $10.31 \pm 0.58$ | $9.47 \pm 0.62$  |
| Aad | Agb | $11.00 \pm 0.00$ | $10.80 \pm 0.42$ | $8.92 \pm 1.35$  |
| Aad | Arg | $11.00 \pm 0.82$ | $10.04 \pm 1.48$ | $9.20 \pm 1.43$  |
| Aad | Agh | $11.10 \pm 0.57$ | $10.18 \pm 0.81$ | $9.15 \pm 0.97$  |

<sup>a</sup>The average  $^3J_{NH\alpha}$  coupling constant values for the strand residues were calculated without including values for Gly, which was in the  $\beta$ -turn.

**Table S3.** The <sup>1</sup>H Chemical Shift Assignments for Peptide HPDAspAgp.

| Residue            | HN           | Hα           | Hβ           | Others                                  |
|--------------------|--------------|--------------|--------------|-----------------------------------------|
| Ac                 |              | 2.034        |              |                                         |
| Arg1               | 8.324        | 4.271        | 1.804, 1.728 | Hγ: 1.619; Hδ: 3.193; NHt: 7.219        |
| Asp2 <sup>a</sup>  | 8.497        | 4.689        | 2.716, 2.568 |                                         |
| Val3 <sup>b</sup>  | 8.198        | 4.242        | 2.121        | Hγ: 0.915                               |
| Thr4               | 8.324        | 4.636        | 4.000        | Hγ: 1.078                               |
| Val5 <sup>c</sup>  | 8.431        | 4.521        | 2.011        | Hγ: 0.936                               |
| <sup>D</sup> Pro6  |              | 4.408        | 2.335, 1.978 | Hγ: 2.054; Hδ: 3.893, 3.801             |
| Gly7 <sup>d</sup>  | 8.412        | 3.988, 3.812 |              |                                         |
| Orn8 <sup>e</sup>  | 8.126        | 4.511        | 1.883, 1.817 | Hγ: 1.744, 1.687; Hδ: 3.014; NHt: 7.634 |
| Agp9 <sup>f</sup>  | 8.771        | 4.758        | 3.677, 3.444 | HNt: 7.385                              |
| Ile10 <sup>g</sup> | 8.534        | 4.211        | 1.852        | Hγ: 1.405, 1.168, 0.883(Me); Hδ: 0.820  |
| Leu11              | 8.452        | 4.445        | 1.630        | Hγ: 1.578; Hδ: 0.922, 0.863             |
| Gln12 <sup>h</sup> | 8.505        | 4.312        | 2.104, 1.973 | Hγ: 2.358; HNt: 7.525, 6.899            |
| NH <sub>2</sub>    | 7.662, 7.146 |              |              |                                         |

<sup>a</sup>The assignments for the minor Asp2 spin system are 8.508(HN), 4.649(Hα), 2.723, 2.580(Hβ). <sup>b</sup>The assignments for the minor Val3 spin system are 8.118(HN), 4.186(Hα), 2.171(Hβ), 0.921(Hγ). <sup>c</sup>The assignments for the minor Val5 spin system are 8.279(HN), 4.095 (Hα), 2.049(Hβ), 0.897, 0.798(Hγ); <sup>d</sup>The assignments for the minor Gly7 spin system are 8.676(HN), 4.016, 3.953(Hα). <sup>e</sup>The assignments for the minor Orn8 spin system are 8.477(HN), 4.375(Hα), 1.872, 1.752(Hβ), 1.631, 1.590(Hγ), 3.014(Hδ). <sup>f</sup>The assignments for the minor Agp9 spin system are 8.688(HN), 4.650(Hα), 3.637, 3.465(Hβ). <sup>g</sup>The assignments for the minor Ile10 spin system are 8.431(HN), 4.143(Hα), 1.835(Hβ), 1.167(Hγ), 0.870(Hδ). <sup>h</sup>The assignments for the minor Gln12 spin system are 8.435(HN), 4.295 (Hα), 2.099(Hβ), 2.364(Hr), 7.551, 6.896(HNt).

**Table S4.** The <sup>1</sup>H Chemical Shift Assignments for Peptide HPDGluAgp.

| Residue            | HN           | Hα           | Hβ           | Others                                  |
|--------------------|--------------|--------------|--------------|-----------------------------------------|
| Ac                 |              | 2.032        |              |                                         |
| Arg1 <sup>a</sup>  | 8.271        | 4.307        | 1.816, 1.733 | Hγ: 1.623; Hδ: 3.200; HNt: 7.210        |
| Glu2               | 8.523        | 4.477        | 1.919        | Hγ: 2.247, 2.179                        |
| Val3 <sup>b</sup>  | 8.452        | 4.288        | 2.080        | Hγ: 0.917                               |
| Thr4 <sup>c</sup>  | 8.310        | 4.715        | 4.012        | Hγ: 1.074                               |
| Val5 <sup>d</sup>  | 8.456        | 4.555        | 2.003        | Hγ: 0.927                               |
| <sup>D</sup> Pro6  |              | 4.402        | 2.337, 1.974 | Hγ: 2.061; Hδ: 3.878, 3.812             |
| Gly7 <sup>e</sup>  | 8.410        | 3.980, 3.816 |              |                                         |
| Orn8 <sup>f</sup>  | 8.109        | 4.521        | 1.875, 1.822 | Hγ: 1.742, 1.686; Hδ: 3.015; HNt: 7.623 |
| Agp9               | 8.762        | 4.808        | 3.626, 3.457 | HNt: 7.361                              |
| Ile10 <sup>g</sup> | 8.593        | 4.266        | 1.843        | Hγ: 1.392, 1.142, 0.873(Me); Hδ: 0.811  |
| Leu11              | 8.431        | 4.466        | 1.620        | Hγ: 1.582; Hδ: 0.907, 0.859             |
| Gln12 <sup>h</sup> | 8.515        | 4.321        | 2.091, 1.971 | Hγ: 2.341; HNt: 7.484, 6.872            |
| NH <sub>2</sub>    | 7.655, 7.127 |              |              |                                         |

<sup>a</sup>The assignments for the minor Arg1 spin system are 8.456(HN), 4.373(Hα), 1.876, 1.756(Hβ), 1.611(Hγ), 3.011(Hδ).

<sup>b</sup>The assignments for the minor Val3 spin system are 8.267(HN), 4.161(Hα), 2.090(Hβ), 0.927(Hγ). <sup>c</sup>The assignments for the minor Thr4 spin system are 8.212(HN), 4.290(Hα), 4.100(Hβ), 1.158(Hγ). <sup>d</sup>The assignments for the minor Val5 spin system are 8.608(HN), 4.567(Hα), 1.993(Hβ), 0.932(Hγ). <sup>e</sup>The assignments for the minor Gly7 spin system are 8.701(HN), 4.007, 3.965(Hα). <sup>f</sup>The assignments for the minor Orn8 spin system are 8.025(HN), 4.533(Hα), 1.864(Hβ), 1.704(Hγ), 3.019(Hδ). <sup>g</sup>The assignments for the minor Ile10 spin system are 8.393(HN), 4.149(Hα), 1.836(Hβ), 1.463, 1.167(Hγ), 0.897(Hδ). <sup>h</sup>The assignments for the minor Gln12 spin system are 8.399(HN), 4.300(Hα), 2.100, 1.977(Hβ), 2.363(Hγ), 7.531, 6.872(HNt).

**Table S5.** The <sup>1</sup>H Chemical Shift Assignments for Peptide HPDAadAgp.

| Residue            | HN           | Hα           | Hβ           | Others                                  |
|--------------------|--------------|--------------|--------------|-----------------------------------------|
| Ac                 |              | 2.021        |              |                                         |
| Arg1               | 8.279        | 4.310        | 1.807, 1.736 | Hγ: 1.620; Hδ: 3.198; NHt: 7.216        |
| Aad2               | 8.448        | 4.462        | 1.708        | Hγ: 1.492; Hδ: 2.182                    |
| Val3 <sup>a</sup>  | 8.470        | 4.283        | 2.060        | Hγ: 0.915                               |
| Thr4 <sup>b</sup>  | 8.328        | 4.695        | 4.020        | Hγ: 1.077                               |
| Val5 <sup>c</sup>  | 8.476        | 4.553        | 1.992        | Hγ: 0.933                               |
| <sup>D</sup> Pro6  |              | 4.406        | 2.337, 1.981 | Hγ: 2.061; Hδ: 3.875, 3.813             |
| Gly7 <sup>d</sup>  | 8.435        | 3.975, 3.827 |              |                                         |
| Orn8 <sup>e</sup>  | 8.127        | 4.521        | 1.881, 1.820 | Hγ: 1.745, 1.689; Hδ: 3.016; NHt: 7.639 |
| Agp9 <sup>f</sup>  | 8.787        | 4.837        | 3.602, 3.467 | NHt: 7.368                              |
| Ile10 <sup>g</sup> | 8.595        | 4.270        | 1.845        | Hγ: 1.389, 1.138, 0.876(Me); Hδ: 0.817  |
| Leu11              | 8.455        | 4.468        | 1.615        | Hγ: 1.586; Hδ: 0.857                    |
| Gln12 <sup>h</sup> | 8.552        | 4.322        | 2.098, 1.967 | Hγ: 2.348; HNt: 7.515, 6.893            |
| NH <sub>2</sub>    | 7.679, 7.150 |              |              |                                         |

<sup>a</sup>The assignments for the minor Val3 spin system are 8.380(HN), 4.110(Hα), 2.040(Hβ), 0.898, 802(Hγ). <sup>b</sup>The assignments for the minor Thr4 spin system are 8.243(HN), 4.278(Hα), 4.098(Hβ), 1.152(Hγ). <sup>c</sup>The assignments for the minor Val5 spin system are 8.294(HN), 4.156 (Hα), 2.068(Hβ), 0.924(Hγ). <sup>d</sup>The assignments for the minor Gly7 spin system are 8.689(HN), 4.010, 3.962(Hα). <sup>e</sup>The assignments for the minor Orn8 spin system are 8.478(HN), 4.376 (Hα), 1.880(Hβ), 1.755, 1.603(Hγ), 3.005(Hδ). <sup>f</sup>The assignments for the minor Agp9 spin system are 8.683(HN), 4.651(Hα), 3.639, 3.469(Hβ), 7.297(NHt). <sup>g</sup>The assignments for the minor Ile10 spin system are 8.420(HN), 4.145(Hα), 1.834(Hβ), 1.171(Hγ), 0.900(Hδ). <sup>h</sup>The assignments for the minor Gln12 spin system are 8.428(HN), 4.297(Hα), 2.103, 1.979(Hβ), 2.366(Hγ), 7.554, 6.892(HNt).

**Table S6.** The <sup>1</sup>H Chemical Shift Assignments for Peptide HPDAspAgb.

| Residue            | HN           | Hα           | Hβ           | Others                                  |
|--------------------|--------------|--------------|--------------|-----------------------------------------|
| Ac                 |              | 2.040        |              |                                         |
| Arg1               | 8.298        | 4.284        | 1.817        | Hγ: 1.729, 1.624; Hδ: 3.195; NHt: 7.209 |
| Asp2 <sup>a</sup>  | 8.472        | 4.700        | 2.695, 2.576 |                                         |
| Val3 <sup>b</sup>  | 8.145        | 4.255        | 2.131        | Hγ: 0.917                               |
| Thr4               | 8.312        | 4.609        | 4.026        | Hγ: 1.087                               |
| Val5 <sup>c</sup>  | 8.448        | 4.514        | 2.027        | Hγ: 0.940                               |
| <sup>D</sup> Pro6  |              | 4.406        | 2.333, 1.963 | Hγ: 2.052, 1.985; Hδ: 3.892, 3.795      |
| Gly7 <sup>d</sup>  | 8.336        | 3.980, 3.801 |              |                                         |
| Orn8               | 8.074        | 4.486        | 1.882        | Hγ: 1.806, 1.716; Hδ: 3.021; NHt: 7.620 |
| Agb9 <sup>e</sup>  | 8.636        | 4.533        | 2.030, 1.952 | Hγ: 3.280, 3.226; NHt: 7.308            |
| Ile10 <sup>f</sup> | 8.445        | 4.195        | 1.850        | Hγ: 1.427, 1.178, 0.883(Me); Hδ: 0.825  |
| Leu11              | 8.408        | 4.434        | 1.636        | Hγ: 1.581; Hδ: 0.915, 0.857             |
| Gln12 <sup>g</sup> | 8.426        | 4.309        | 2.100, 1.973 | Hγ: 2.352; HNt: 7.516, 6.870            |
| NH <sub>2</sub>    | 7.629, 7.115 |              |              |                                         |

<sup>a</sup>The assignments for the minor Asp2 spin system are 8.484(HN), 4.656 (Hα), 2.734, 2.595(Hβ). <sup>b</sup>The assignments for the minor Val3 spin system are 8.083(HN), 4.186(Hα), 2.166(Hβ), 0.920(Hγ). <sup>c</sup>The assignments for the minor Val5 spin system are 8.240(HN), 4.095(Hα), 2.046(Hβ), 0.894, 0.798(Hγ). <sup>d</sup>The assignments for the minor Gly7 spin system are 8.632(HN), 4.007, 3.944(Hα). <sup>e</sup>The assignments for the minor Agb9 spin system are 8.591(HN), 4.431 (Hα), 2.045, 1.952(Hβ), 3.273, 3.231(Hγ), 7.228(NHt). <sup>f</sup>The assignments for the minor Ile10 spin system are 8.346(HN), 4.135(Hα), 1.834(Hβ), 1.179(Hγ), 0.889(Hδ). <sup>g</sup>The assignments for the minor Gln12 spin system are 8.364(HN), 4.299(Hα), 2.100, 1.973(Hβ), 2.352(Hγ).

**Table S7.** The <sup>1</sup>H Chemical Shift Assignments for Peptide HPDGluAgb.

| Residue            | HN           | Hα           | Hβ           | Others                                 |
|--------------------|--------------|--------------|--------------|----------------------------------------|
| Ac                 |              | 2.032        |              |                                        |
| Arg1               | 8.265        | 4.321        | 1.818, 1.729 | Hγ: 1.622; Hδ: 3.199; NHt: 7.205       |
| Glu2               | 8.518        | 4.550        | 1.925        | Hγ: 2.253, 2.161                       |
| Val3 <sup>a</sup>  | 8.516        | 4.324        | 2.071        | Hγ: 0.899                              |
| Thr4 <sup>b</sup>  | 8.398        | 4.757        | 4.008        | Hγ: 1.055                              |
| Val5 <sup>c</sup>  | 8.637        | 4.561        | 1.989        | Hγ: 0.929                              |
| <sup>D</sup> Pro6  |              | 4.389        | 2.346, 1.974 | Hγ: 2.096, 2.042; Hδ: 3.868, 3.830     |
| Gly7 <sup>d</sup>  | 8.369        | 3.989, 3.782 |              |                                        |
| Orn8 <sup>e</sup>  | 8.035        | 4.554        | 1.870, 1.800 | Hγ: 1.707; Hδ: 3.017; NHt: 7.619       |
| Agb9 <sup>f</sup>  | 8.667        | 4.658        | 1.940        | Hδ: 3.275, 3.196; NHt: 7.231           |
| Ile10 <sup>g</sup> | 8.668        | 4.306        | 1.848        | Hγ: 1.389, 1.144, 0.870(Me); Hδ: 0.809 |
| Leu11              | 8.413        | 4.477        | 1.617        | Hγ: 1.580; Hδ: 0.897, 0.845            |
| Gln12 <sup>h</sup> | 8.532        | 4.327        | 2.091, 1.954 | Hγ: 2.330; HNt: 7.469, 6.871           |
| NH <sub>2</sub>    | 7.671, 7.132 |              |              |                                        |

<sup>a</sup>The assignments for the minor Val3 spin system are 8.364(HN), 4.162(Hα), 2.093(Hβ), 0.928(Hγ). <sup>b</sup>The assignments for the minor Thr4 spin system are 8.219(HN), 4.290 (Hα), 4.102(Hβ), 1.158(Hγ). <sup>c</sup>The assignments for the minor Val5 spin system are 8.351(HN), 4.103(Hα), 2.037(Hβ), 0.894, 0.799(Hγ). <sup>d</sup>The assignments for the minor Gly7 spin system are 8.682(HN), 4.003, 3.949(Hα). <sup>e</sup>The assignments for the minor Orn8 spin system are 8.423(HN), 4.336(Hα), 1.866(Hβ), 1.755(Hγ), 3.016(Hδ); <sup>f</sup>The assignments for the minor Agb9 spin system are 8.588(HN), 4.431(Hα), 2.048, 1.950(Hβ), 3.272, 3.230(Hγ). <sup>g</sup>The assignments for the minor Ile10 spin system are 8.344(HN), 4.134(Hα), 1.836(Hβ), 1.181(Hγ), 0.889(Hδ). <sup>h</sup>The assignments for the minor Gln12 spin system are 8.364(HN), 4.301(Hα), 2.100, 1.976(Hβ), 2.360(Hr), 7.532, 6.868(NHt).

**Table S8.** The <sup>1</sup>H Chemical Shift Assignments for Peptide HPDAadAgb.

| Residue            | HN           | Hα           | Hβ           | Others                                 |
|--------------------|--------------|--------------|--------------|----------------------------------------|
| Ac                 |              | 2.023        |              |                                        |
| Arg1               | 8.252        | 4.348        | 1.811, 1.733 | Hγ: 1.616; Hδ: 3.197; NHt: 7.198       |
| Aad2               | 8.420        | 4.629        | 1.685        | Hγ: 1.617; Hδ: 2.173, 2.116            |
| Val3 <sup>a</sup>  | 8.568        | 4.360        | 2.043        | Hγ: 0.897, 0.881                       |
| Thr4 <sup>b</sup>  | 8.447        | 4.794        | 4.016        | Hγ: 1.053                              |
| Val5 <sup>c</sup>  | 8.712        | 4.570        | 1.994        | Hγ: 0.928                              |
| <sup>D</sup> Pro6  |              | 4.383        | 2.351, 1.971 | Hγ: 2.107, 2.046; Hδ: 3.851            |
| Gly7 <sup>d</sup>  | 8.370        | 3.988, 3.775 |              |                                        |
| Orn8               | 8.019        | 4.584        | 1.867, 1.798 | Hγ: 1.706; Hδ: 3.018; NHt: 7.624       |
| Agb9 <sup>e</sup>  | 8.674        | 4.720        | 1.955, 1.871 | Hγ: 3.289, 3.193; NHt: 7.280           |
| Ile10              | 8.753        | 4.360        | 1.848        | Hγ: 1.378, 1.133, 0.869(Me); Hδ: 0.804 |
| Leu11              | 8.418        | 4.488        | 1.586        | Hγ: 1.453; Hδ: 0.884, 0.840            |
| Gln12 <sup>f</sup> | 8.585        | 4.332        | 2.087, 1.946 | Hγ: 2.324; HNt: 7.454, 6.869           |
| NH <sub>2</sub>    | 7.688, 7.137 |              |              |                                        |

<sup>a</sup>The assignments for the minor Val3 spin system are 8.264(HN), 4.161(Hα), 2.072(Hβ), 0.923(Hγ); <sup>b</sup>The assignments for the minor Thr4 spin system are 8.223(HN), 4.282 (Hα), 4.105(Hβ), 1.154(Hγ); <sup>c</sup>The assignments for the minor Val5 spin system are 8.340(HN), 4.126(Hα), 2.037, 1.879(Hβ), 0.893, 0.803(Hγ); <sup>d</sup>The assignments for the minor Gly7 spin system are 8.647(HN), 3.999, 3.950(Hα). <sup>e</sup>The assignments for the minor Agb9 spin system are 8.421(HN), 4.387(Hα), 1.879, 1.770(Hβ); <sup>f</sup>The assignments for the minor Gln12 spin system are 8.364(HN), 4.301(Hα), 2.104, 1.977(Hβ), 2.359 (Hr).

**Table S9.** The <sup>1</sup>H Chemical Shift Assignments for Peptide HPDAspArg.

| Residue            | HN           | Hα           | Hβ           | Others                                  |
|--------------------|--------------|--------------|--------------|-----------------------------------------|
| Ac                 |              | 2.038        |              |                                         |
| Arg1               | 8.292        | 4.285        | 1.817, 1.730 | Hγ: 1.625; Hδ: 3.199; HNt: 7.209        |
| Asp2 <sup>a</sup>  | 8.450        | 4.696        | 2.695, 2.582 |                                         |
| Val3 <sup>b</sup>  | 8.152        | 4.244        | 2.130        | Hγ: 0.921                               |
| Thr4               | 8.270        | 4.641        | 3.991        | Hγ: 1.077                               |
| Val5 <sup>c</sup>  | 8.457        | 4.519        | 2.032        | Hγ: 0.941                               |
| <sup>D</sup> Pro6  |              | 4.402        | 2.334, 1.967 | Hγ: 2.054, 1.987; Hδ: 3.895, 3.796      |
| Gly7 <sup>d</sup>  | 8.346        | 3.796, 3.983 |              |                                         |
| Orn8               | 8.025        | 4.490        | 1.872, 1.807 | Hγ: 1.731, 1.684; Hδ: 3.019; NHt: 7.615 |
| Arg9               | 8.509        | 4.441        | 1.792, 1.711 | Hγ: 1.632, 1.541; Hδ: 3.171; NHt: 7.261 |
| Ile10 <sup>e</sup> | 8.422        | 4.187        | 1.850        | Hγ: 1.435, 1.182, 0.881(Me); Hδ: 0.816  |
| Leu11              | 8.388        | 4.426        | 1.637        | Hγ: 1.584; Hδ: 0.919, 0.854             |
| Gln12 <sup>f</sup> | 8.393        | 4.306        | 2.105, 1.976 | Hγ: 2.354; HNt: 6.867, 7.518            |
| NH <sub>2</sub>    | 7.110, 7.629 |              |              |                                         |

<sup>a</sup>The assignments for the minor Asp2 spin system are 8.480(HN), 4.651(Hα), 2.746, 2.607(Hβ); <sup>b</sup>Val3 spin system are 8.076(HN), 4.189(Hα), 2.167(Hβ), 0.921(Hγ); <sup>c</sup>Val5 spin system are 8.326(HN), 4.139(Hα), 1.832(Hβ), 0.883(Hγ); <sup>d</sup>Gly7 spin system are 8.620(HN), 4.005, 3.933(Hα); <sup>e</sup>Ile10 spin system are 8.235(HN), 4.100 (Hα), 2.045(Hβ), 0.894(Hγ), 0.797(Hδ); <sup>f</sup>Gln12 spin system are 8.338(HN), 4.303 (Hα), 1.976(Hβ), 2.359(Hγ).

**Table S10.** The <sup>1</sup>H Chemical Shift Assignments for Peptide HPDGluArg.

| Residue            | HN           | Hα           | Hβ           | Others                                  |
|--------------------|--------------|--------------|--------------|-----------------------------------------|
| Ac                 |              | 2.029        |              |                                         |
| Arg1 <sup>a</sup>  | 8.259        | 4.316        | 1.818, 1.733 | Hγ: 1.625; Hδ: 3.199; HNt: 7.203        |
| Glu2 <sup>b</sup>  | 8.504        | 4.530        | 1.927        | Hγ: 2.173, 2.067                        |
| Val3 <sup>c</sup>  | 8.503        | 4.319        | 2.249        | Hγ: 0.908                               |
| Thr4 <sup>d</sup>  | 8.289        | 4.777        | 3.962        | Hγ: 1.047                               |
| Val5               | 8.601        | 4.566        | 2.004        | Hγ: 0.931                               |
| <sup>D</sup> Pro6  |              | 4.390        | 1.972, 2.346 | Hγ: 2.046, 2.094; Hδ: 3.823, 3.884      |
| Gly7 <sup>e</sup>  | 8.401        | 3.777, 3.992 |              |                                         |
| Orn8               | 8.006        | 4.537        | 1.860, 1.810 | Hγ: 1.722, 1.680; Hδ: 3.015; NHt: 7.618 |
| Arg9               | 8.521        | 4.537        | 1.722        | Hγ: 1.525, 1.614; Hδ: 3.151; NHt: 7.258 |
| Ile10 <sup>f</sup> | 8.613        | 4.275        | 1.849        | Hγ: 1.409, 1.156, 0.866(Me); Hδ: 0.801  |
| Leu11              | 8.400        | 4.472        | 1.625        | Hγ: 1.579; Hδ: 0.902, 0.844             |
| Gln12 <sup>g</sup> | 8.489        | 4.293        | 1.965, 2.094 | Hγ: 2.336; HNt: 6.866, 7.469            |
| NH <sub>2</sub>    | 7.121, 7.658 |              |              |                                         |

<sup>a</sup>The assignments for the minor Arg1 spin system are 8.421(HN), 4.316 (Hα), 1.801, 1.738(Hβ), 1.631, 1.582(Hγ); <sup>b</sup>Glu2 spin system are 8.339(HN), 4.300(Hα), 1.979(Hβ), 2.359, 2.103(Hγ); <sup>c</sup>Val3 spin system are 8.260(HN), 4.162(Hα), 2.090(Hβ), 0.927(Hγ); <sup>d</sup>Thr4 spin system are 8.221(HN), 4.294(Hα), 4.102(Hβ), 1.157(Hγ); <sup>e</sup>Gly7 spin system are 8.666(HN), 4.000, 3.935(Hα); <sup>f</sup>Ile10 spin system are 8.333(HN), 4.120(Hα), 1.832(Hβ), 0.892(Hγ), 0.797(Hδ); <sup>g</sup>Gln12 spin system are 8.542(HN), 4.337(Hα), 2.037, 1.940(Hβ), 2.250(Hγ).

**Table S11.** The <sup>1</sup>H Chemical Shift Assignments for Peptide HPDAadArg.

| Residue            | HN           | Hα           | Hβ           | Others                                               |
|--------------------|--------------|--------------|--------------|------------------------------------------------------|
| Ac                 |              | 2.023        |              |                                                      |
| Arg1 <sup>b</sup>  | 8.248        | 4.323        | 1.807, 1.733 | H <sub>γ</sub> : 1.619 ; Hδ: 3.197; NHt: 7.206       |
| Aad2               | 8.409        | 4.528        | 2.146        | H <sub>γ</sub> : 1.484; Hδ: 2.195                    |
| Val3 <sup>c</sup>  | 8.492        | 4.303        | 2.054        | H <sub>γ</sub> : 0.903                               |
| Thr4 <sup>a</sup>  | 8.287        | 4.750        | 3.973        | H <sub>γ</sub> : 1.048                               |
| Val5               | 8.611        | 4.562        | 1.994        | H <sub>γ</sub> : 0.930                               |
| <sup>D</sup> Pro6  |              | 4.391        | 2.343, 1.973 | H <sub>γ</sub> : 2.093, 2.045; Hδ: 3.874, 3.822      |
| Gly7 <sup>d</sup>  | 8.400        | 3.992, 3.795 |              |                                                      |
| Orn8               | 8.010        | 4.537        | 1.862, 1.809 | H <sub>γ</sub> : 1.727, 1.680; Hδ: 3.015; NHt: 7.621 |
| Arg9               | 8.528        | 4.558        | 1.730, 1.619 | H <sub>γ</sub> : 1.543; Hδ: 3.151; NHt: 7.245        |
| Ile10 <sup>e</sup> | 8.600        | 4.291        | 1.841        | H <sub>γ</sub> : 1.408, 1.153, 0.867(Me); Hδ: 0.803  |
| Leu11              | 8.408        | 4.465        | 1.686        | H <sub>γ</sub> : 1.597; Hδ: 0.898, 0.844             |
| Gln12 <sup>f</sup> | 8.505        | 4.320        | 2.093, 1.961 | H <sub>γ</sub> : 2.337; HNt: 7.473, 6.869            |
| NH <sub>2</sub>    | 7.658, 7.125 |              |              |                                                      |

<sup>a</sup>Signal for Thr4 Ha not observed. The assignments for the minor Thr4 spin system are 8.220(HN), 4.283(Hα), 4.099(Hβ), 1.150(H<sub>γ</sub>). <sup>b</sup>The assignments for the minor Arg1 spin system are 8.370(HN), 4.345(Hα), 1.859, 1.742(Hβ), 1.586(H<sub>γ</sub>); <sup>c</sup>Val3 spin system are 8.259(HN), 4.157(Hα), 2.069(Hβ), 0.922(H<sub>γ</sub>); <sup>d</sup>Gly7 spin system are 8.635(HN), 3.999, 3.935(Hα); <sup>e</sup>Ile10 spin system are 8.328(HN), 4.124(Hα), 1.830(Hβ), 0.889(H<sub>γ</sub>), 0.799(Hδ); <sup>f</sup>Gln12 spin system are 8.339(HN), 4.301(Hα), 2.103, 1.976(Hβ), 2.359(H<sub>γ</sub>).

**Table S12.** The <sup>1</sup>H Chemical Shift Assignments for Peptide HPDAspAgh.

| Residue            | HN           | Hα           | Hβ           | Others                                                          |
|--------------------|--------------|--------------|--------------|-----------------------------------------------------------------|
| Ac                 |              | 2.040        |              |                                                                 |
| Arg1               | 8.298        | 4.284        | 1.819, 1.729 | H <sub>γ</sub> : 1.628; Hδ: 3.196; NHt: 7.213                   |
| Asp2 <sup>a</sup>  | 8.460        | 4.684        | 2.691, 2.585 |                                                                 |
| Val3 <sup>b</sup>  | 8.148        | 4.239        | 2.134        | H <sub>γ</sub> : 0.925                                          |
| Thr4               | 8.249        | 4.631        | 3.990        | H <sub>γ</sub> : 1.082                                          |
| Val5               | 8.452        | 4.508        | 2.028        | H <sub>γ</sub> : 0.944                                          |
| <sup>D</sup> Pro6  |              | 4.406        | 2.333, 1.962 | H <sub>γ</sub> : 2.051, 1.983; Hδ: 3.898, 3.791                 |
| Gly7 <sup>c</sup>  | 8.347        | 3.985, 3.793 |              |                                                                 |
| Orn8               | 8.015        | 4.481        | 1.874, 1.804 | H <sub>γ</sub> : 1.728, 1.687; Hδ: 3.019; NHt: 7.615            |
| Agh9               | 8.457        | 4.392        | 1.746, 1.696 | H <sub>γ</sub> : 1.575; Hδ: 1.394, 1.324; Hε: 3.143; NHt: 7.174 |
| Ile10 <sup>d</sup> | 8.371        | 4.174        | 1.848        | H <sub>γ</sub> : 1.438, 1.184, 0.880(Me); Hδ: 0.817             |
| Leu11 <sup>e</sup> | 8.366        | 4.410        | 1.638        | H <sub>γ</sub> : 1.582; Hδ: 0.920, 0.857                        |
| Gln12 <sup>f</sup> | 8.380        | 4.305        | 1.970        | H <sub>γ</sub> : 2.355, 2.106; HNt: 7.528, 6.870                |
| NH <sub>2</sub>    | 7.633, 7.105 |              |              |                                                                 |

<sup>a</sup>The assignments for the minor Asp2 spin system are 8.483(HN), 4.646(Hα), 2.740, 2.600(Hβ); <sup>b</sup>The assignments for the minor Val3 spin system are 8.078(HN), 4.189(Hα), 2.165(Hβ), 0.921(H<sub>γ</sub>); <sup>c</sup>The assignments for the minor Gly7 spin system are 8.625(HN), 3.998, 3.937(Hα); <sup>d</sup>The assignments for the minor Ile10 spin system are 8.291 (HN), 4.132(Hα), 1.177(H<sub>γ</sub>), 0.885(Hδ); <sup>e</sup>The assignments for the minor Leu11 spin system are 8.239 (HN), 4.094(Hα), 2.045(Hβ), 0.893(H<sub>γ</sub>), 0.798(Hδ). <sup>f</sup>The assignments for the minor Gln12 spin system are 8.330(HN), 4.299(Hα), 1.974(Hβ), 2.361, 2.104(H<sub>γ</sub>).



**Table S13.** The <sup>1</sup>H Chemical Shift Assignments for Peptide HPDGluAgh.

| Residue           | HN           | Hα           | Hβ           | Others                                                |
|-------------------|--------------|--------------|--------------|-------------------------------------------------------|
| Ac                |              | 2.029        |              |                                                       |
| Arg1              | 8.263        | 4.313        | 1.817, 1.732 | Hγ: 1.621; Hδ: 3.198; NHt: 7.209                      |
| Glu2 <sup>a</sup> | 8.519        | 4.509        | 1.990, 1.929 | Hγ: 2.257, 2.184                                      |
| Val3 <sup>b</sup> | 8.493        | 4.294        | 2.078        | Hγ: 0.910                                             |
| Thr4 <sup>c</sup> | 8.259        | 4.749        | 3.968        | Hγ: 1.056                                             |
| Val5 <sup>d</sup> | 8.605        | 4.555        | 1.997        | Hγ: 0.930                                             |
| <sup>D</sup> Pro6 |              | 4.391        | 2.343, 1.971 | Hγ: 2.085, 2.032; Hδ: 3.877, 3.819                    |
| Gly7 <sup>e</sup> | 8.390        | 3.985, 3.780 |              |                                                       |
| Orn8              | 7.999        | 4.532        | 1.867, 1.804 | Hγ: 1.701; Hδ: 3.017; NHt: 7.616                      |
| Agh9 <sup>f</sup> | 8.459        | 4.506        | 1.692        | Hγ: 1.542; Hδ: 1.382, 1.305;<br>Hε: 3.122; NHt: 7.151 |
| Ile10             | 8.566        | 4.254        | 1.839        | Hγ: 1.408, 1.159, 0.866(Me); Hδ: 0.802                |
| Leu11             | 8.379        | 4.473        | 1.624        | Hγ: 1.574; Hδ: 0.904, 0.846                           |
| Gln12             | 8.486        | 4.328        | 2.108, 1.965 | Hγ: 2.337; HNt: 7.478, 6.869                          |
| NH <sub>2</sub>   | 7.658, 7.125 |              |              |                                                       |

<sup>a</sup>The assignments for the minor Glu2 spin system are 8.546(HN), 4.337(Hα), 2.032, 1.939(Hβ), 2.263, 2.183(Hγ). <sup>b</sup>The assignments for the minor Val3 spin system are 8.263(HN), 4.161(Hα), 2.089(Hβ), 0.934(Hγ); <sup>c</sup>Thr4 spin system are 8.225(HN), 4.293(Hα), 4.102(Hβ), 1.155(Hγ); <sup>d</sup>The assignments for the minor Val5 spin system are 8.342(HN), 4.105(Hα), 2.033(Hβ), 0.898, 0.797(Hγ); <sup>e</sup>Gly7 spin system are 8.668(HN), 3.994, 3.938(Hα). <sup>f</sup>The assignments for the minor Agh9 spin system are 8.367(HN), 4.351(Hα), 1.864(Hβ), 1.740(Hγ), 1.387, 1.345(Hδ), 3.011(Hε), 7.124(NHt).

**Table S14.** The <sup>1</sup>H Chemical Shift Assignments for Peptide HPDAadAgh.

| Residue            | HN           | Hα           | Hβ           | Others                                                                  |
|--------------------|--------------|--------------|--------------|-------------------------------------------------------------------------|
| Ac                 |              | 2.021        |              |                                                                         |
| Arg1 <sup>a</sup>  | 8.252        | 4.327        | 1.808, 1.735 | Hγ: 1.619; Hδ: 3.197; NHt: 7.203                                        |
| Aad2               | 8.415        | 4.533        | 1.692        | Hγ: 1.619, 1.492; Hδ: 2.205, 2.150                                      |
| Val3 <sup>b</sup>  | 8.498        | 4.304        | 2.064        | Hγ: 0.905                                                               |
| Thr4 <sup>c</sup>  | 8.259        | 4.738        | 3.971        | Hγ: 1.056                                                               |
| Val5 <sup>d</sup>  | 8.621        | 4.557        | 1.995        | Hγ: 0.930                                                               |
| <sup>D</sup> Pro6  |              | 4.390        | 2.343, 1.971 | Hγ: 2.091, 2.045; Hδ: 3.871, 3.820                                      |
| Gly7 <sup>e</sup>  | 8.395        | 3.984, 3.790 |              |                                                                         |
| Orn8               | 8.001        | 4.539        | 1.868, 1.804 | Hγ: 1.702; Hδ: 3.017; NHt: 7.619<br>Hγ: 1.658, 1.541; Hδ: 1.391, 1.316; |
| Agh9               | 8.465        | 4.535        | 1.697        | Hε: 3.125; NHt: 7.156                                                   |
| Ile10 <sup>f</sup> | 8.591        | 4.273        | 1.839        | Hγ: 1.405, 1.156, 0.868(Me); Hδ: 0.802                                  |
| Leu11              | 8.387        | 4.474        | 1.629        | Hγ: 1.590; Hδ: 0.896, 0.846                                             |
| Gln12 <sup>g</sup> | 8.507        | 4.326        | 2.098, 1.957 | Hγ: 2.337; HNt: 7.473, 6.870                                            |
| NH <sub>2</sub>    | 7.662, 7.128 |              |              |                                                                         |

<sup>a</sup>The assignments for the minor Arg1 spin system are 8.366(HN), 4.352(Hα), 1.865, 1.737(Hβ), 1.590(Hγ), 3.013(Hδ);

<sup>b</sup>The assignments for the minor Val3 spin system are 8.334(HN), 4.111(Hα), 2.034(Hβ), 0.895, 0.800(Hγ); <sup>c</sup>The assignments for the minor Thr4 spin system are 8.225(HN), 4.286(Hα), 4.101(Hβ), 1.152(Hγ); <sup>d</sup>The assignments for the minor Val5 spin system are 8.262(HN), 4.159(Hα), 2.073(Hβ), 0.931(Hγ); <sup>e</sup>The assignments for the minor Gly7 spin system are 8.639(HN), 3.995, 3.940(Hα); <sup>f</sup>The assignments for the minor Ile10 spin system are 8.288 (HN), 4.134(Hα), 1.830(Hβ), 1.181(Hγ), 0.885(Hδ); <sup>g</sup>The assignments for the minor Gln12 spin system are 8.330(HN), 4.300(Hα), 2.103, 1.978(Hβ), 2.360(Hγ), 7.535, 6.867(HNt).

**Table S15.** The <sup>1</sup>H Chemical Shift Assignments for Peptide HPDUAspAgp.

| Residue            | HN           | H $\alpha$ | H $\beta$    | Others                                                    |
|--------------------|--------------|------------|--------------|-----------------------------------------------------------|
| Ac                 |              | 2.039      |              |                                                           |
| Arg1               | 8.327        | 4.263      | 1.810, 1.733 | H $\gamma$ : 1.621; H $\delta$ : 3.194; NHt: 7.222        |
| Asp2 <sup>a</sup>  | 8.499        | 4.640      | 2.728, 2.601 |                                                           |
| Val3 <sup>b</sup>  | 8.072        | 4.190      | 2.149        | H $\gamma$ : 0.922                                        |
| Thr4 <sup>c</sup>  | 8.334        | 4.312      | 4.128        | H $\gamma$ : 1.178                                        |
| Val5 <sup>d</sup>  | 8.218        | 4.426      | 2.071        | H $\gamma$ : 0.972                                        |
| <sup>L</sup> Pro6  |              | 4.404      | 2.311, 1.930 | H $\gamma$ : 2.059, 1.989; H $\delta$ : 3.892, 3.701      |
| Gly7 <sup>e</sup>  | 8.497        | 3.959      |              |                                                           |
| Orn8 <sup>f</sup>  | 8.292        | 4.386      | 1.882        | H $\gamma$ : 1.765, 1.682; H $\delta$ : 3.005; NHt: 7.638 |
| Agp9 <sup>g</sup>  | 8.645        | 4.660      | 3.636, 3.480 | HNt: 7.280                                                |
| Ile10 <sup>h</sup> | 8.406        | 4.146      | 1.838        | H $\gamma$ : 1.448, 1.168, 0.895(Me); H $\delta$ : 0.853  |
| Leu11              | 8.448        | 4.379      | 1.638        | H $\gamma$ : 1.589; H $\delta$ : 0.933, 0.875             |
| Gln12 <sup>i</sup> | 8.429        | 4.293      | 2.103, 1.980 | H $\gamma$ : 2.367; HNt: 7.550, 6.889                     |
| NH <sub>2</sub>    | 7.628, 7.133 |            |              |                                                           |

<sup>a</sup>The assignments for the minor Asp2 spin system are 8.512(HN), 4.665(H $\alpha$ ), 2.750, 2.616(H $\beta$ ). <sup>b</sup>The assignments for the minor Val3 spin system are 8.124(HN), 4.240(H $\alpha$ ), 2.192(H $\beta$ ), 0.926(H $\gamma$ ). <sup>c</sup>The assignments for the minor Thr4 spin system are 8.268(HN), 4.314 (H $\alpha$ ), 4.164(H $\beta$ ), 1.197(H $\gamma$ ). <sup>d</sup>The assignments for the minor Val5 spin system are 8.004(HN), 4.273(H $\alpha$ ), 1.990(H $\beta$ ), 0.902(H $\gamma$ ). <sup>e</sup>The assignments for the minor Gly7 spin system are 8.576(HN), 3.970, 3.917(H $\alpha$ ). <sup>f</sup>The assignments for the minor Orn8 spin system are 8.127(HN), 4.367(H $\alpha$ ), 1.864(H $\beta$ ), 1.778, 1.678(H $\gamma$ ), 3.010(H $\delta$ ) and 8.510(HN), 4.364(H $\alpha$ ), 1.875(H $\beta$ ), 1.761, 1.696(H $\gamma$ ), 3.013(H $\delta$ ). <sup>g</sup>The assignments for the minor Agp9 spin system are 8.670(HN), 4.652(H $\alpha$ ), 3.640, 3.486(H $\beta$ ). <sup>h</sup>The assignments for the minor Ile10 spin system are 8.204(HN), 4.136(H $\alpha$ ), 1.847(H $\beta$ ), 0.877(H $\gamma$ ). <sup>i</sup>The assignments for the minor Gln12 spin system are 8.376(HN), 4.295(H $\alpha$ ), 2.106, 1.977(H $\beta$ ), 2.365(H $\gamma$ ).

**Table S16.** The <sup>1</sup>H Chemical Shift Assignments for Peptide HPDUGluAgp.

| Residue            | HN           | H $\alpha$ | H $\beta$    | Others                                                    |
|--------------------|--------------|------------|--------------|-----------------------------------------------------------|
| Ac                 |              | 2.039      |              |                                                           |
| Arg1               | 8.281        | 4.271      | 1.819, 1.735 | H $\gamma$ : 1.631; H $\delta$ : 3.203; HNt: 7.215        |
| Glu2               | 8.548        | 4.331      | 2.032, 1.939 | H $\gamma$ : 2.277, 2.237                                 |
| Val3 <sup>a</sup>  | 8.258        | 4.164      | 2.081        | H $\gamma$ : 0.931                                        |
| Thr4 <sup>b</sup>  | 8.271        | 4.354      | 4.108        | H $\gamma$ : 1.162                                        |
| Val5 <sup>c</sup>  | 8.281        | 4.445      | 2.056        | H $\gamma$ : 0.972, 0.937                                 |
| <sup>L</sup> Pro6  |              | 4.399      | 2.310, 1.931 | H $\gamma$ : 2.062, 1.990; H $\delta$ : 3.884, 3.705      |
| Gly7 <sup>d</sup>  | 8.476        | 3.959      |              |                                                           |
| Orn8 <sup>e</sup>  | 8.271        | 4.388      | 1.882        | H $\gamma$ : 1.778, 1.681; H $\delta$ : 3.006; HNt: 7.625 |
| Agp9 <sup>f</sup>  | 8.630        | 4.659      | 3.639, 3.480 | HNt: 7.269                                                |
| Ile10 <sup>g</sup> | 8.383        | 4.152      | 1.840        | H $\gamma$ : 1.451, 1.167, 0.894(Me); H $\delta$ : 0.852  |
| Leu11              | 8.425        | 4.383      | 1.641        | H $\gamma$ : 1.592; H $\delta$ : 0.931, 0.876             |
| Gln12 <sup>h</sup> | 8.403        | 4.298      | 2.101, 1.977 | H $\gamma$ : 2.365; HNt: 7.528, 6.873                     |
| NH <sub>2</sub>    | 7.611, 7.114 |            |              |                                                           |

<sup>a</sup>The assignments for the minor Val3 spin system are 8.179(HN), 4.141(H $\alpha$ ), 1.848(H $\beta$ ), 0.890(H $\gamma$ ). <sup>b</sup>The assignments for the minor Thr4 spin system are 8.194(HN), 4.355 (H $\alpha$ ), 4.154(H $\beta$ ), 1.181(H $\gamma$ ). <sup>c</sup>The assignments for the minor Val5 spin system are 8.011(HN), 4.270(H $\alpha$ ), 1.987(H $\beta$ ), 0.900(H $\gamma$ ). <sup>d</sup>The assignments for the minor Gly7 spin system are 8.555(HN), 3.974, 3.907(H $\alpha$ ). <sup>e</sup>The assignments for the minor Orn8 spin system are 8.480(HN), 4.366(H $\alpha$ ), 1.871(H $\beta$ ), 1.759(H $\gamma$ ), 3.009(H $\delta$ ). <sup>f</sup>The assignments for the minor Agp9 spin system are 8.663(HN), 4.651(H $\alpha$ ), 3.639, 3.485(H $\beta$ ), 7.295(HNt). <sup>g</sup>The assignments for the minor Ile10 spin system are 8.144(HN), 4.096(H $\alpha$ ), 1.822(H $\beta$ ), 1.481, 1.192(H $\gamma$ ), 0.899(H $\delta$ ). <sup>h</sup>The assignments for the minor Gln12 spin system are 8.349(HN), 4.295(H $\alpha$ ), 2.105, 1.977(H $\beta$ ), 2.365(H $\gamma$ ).

**Table S17.** The <sup>1</sup>H Chemical Shift Assignments for Peptide HPDUAadAgp.

| Residue            | HN           | H $\alpha$ | H $\beta$    | Others                                                    |
|--------------------|--------------|------------|--------------|-----------------------------------------------------------|
| Ac                 |              | 2.025      |              |                                                           |
| Arg1               | 8.278        | 4.273      | 3.198        | H $\gamma$ : 1.800; H $\delta$ : 1.732, 1.624; NHt: 7.218 |
| Aad2               | 8.438        | 4.330      | 1.759, 1.706 | H $\gamma$ : 1.525; H $\delta$ : 2.209                    |
| Val3               | 8.294        | 4.157      | 2.052        | H $\gamma$ : 0.924                                        |
| Thr4 <sup>a</sup>  | 8.281        | 4.344      | 4.094        | H $\gamma$ : 1.153                                        |
| Val5 <sup>b</sup>  | 8.318        | 4.440      | 2.069        | H $\gamma$ : 0.971, 0.935                                 |
| <sup>L</sup> Pro6  |              | 4.400      | 2.309, 1.931 | H $\gamma$ : 2.060, 1.986; H $\delta$ : 3.885, 3.706      |
| Gly7 <sup>c</sup>  | 8.499        | 3.956      |              |                                                           |
| Orn8 <sup>d</sup>  | 8.292        | 4.384      | 1.877        | H $\gamma$ : 1.769, 1.677; H $\delta$ : 3.003; NHt: 7.639 |
| Agp9               | 8.654        | 4.658      | 3.633, 3.475 | NHt: 7.276                                                |
| Ile10 <sup>e</sup> | 8.410        | 4.145      | 1.837        | H $\gamma$ : 1.444, 1.168, 0.891(Me); H $\delta$ : 0.850  |
| Leu11              | 8.449        | 4.380      | 1.635        | H $\gamma$ : 1.590; H $\delta$ : 0.930, 0.874             |
| Gln12 <sup>f</sup> | 8.429        | 4.293      | 2.102, 1.978 | H $\gamma$ : 2.365; HNt: 7.549, 6.889                     |
| NH <sub>2</sub>    | 7.627, 7.129 |            |              |                                                           |

<sup>a</sup>The assignments for the minor Thr4 spin system are 8.219(HN), 4.344(H $\alpha$ ), 4.151(H $\beta$ ), 1.167(H $\gamma$ ). <sup>b</sup>The assignments for the minor Val5 spin system are 8.018(HN), 4.268(H $\alpha$ ), 1.985(H $\beta$ ), 0.896(H $\gamma$ ). <sup>c</sup>The assignments for the minor Gly7 spin system are 8.585(HN), 3.980, 3.903(H $\alpha$ ). <sup>d</sup>The assignments for the minor Orn8 spin system are 8.125(HN), 4.363(H $\alpha$ ), 1.860(H $\beta$ ), 1.774, 1.680(H $\gamma$ ), 3.004(H $\delta$ ) and 8.483(HN), 4.364(H $\alpha$ ), 1.867(H $\beta$ ), 1.754(H $\gamma$ ), 3.003(H $\delta$ ). <sup>e</sup>The assignments for the minor Ile10 spin system are 8.203(HN), 4.133(H $\alpha$ ), 1.842(H $\beta$ ), 0.887(H $\delta$ ). <sup>f</sup>The assignments for the minor Gln12 spin system are 8.375(HN), 4.291(H $\alpha$ ), 2.104, 1.975(H $\beta$ ), 2.362(H $\gamma$ ).

**Table S18.** The <sup>1</sup>H Chemical Shift Assignments for Peptide HPDUAspAgb.

| Residue           | HN           | H $\alpha$ | H $\beta$    | Others                                                    |
|-------------------|--------------|------------|--------------|-----------------------------------------------------------|
| Ac                |              | 2.042      |              |                                                           |
| Arg1              | 8.302        | 4.266      | 1.817, 1.733 | H $\gamma$ : 1.623; H $\delta$ : 3.195; NHt: 7.211        |
| Asp2              | 8.475        | 4.638      | 2.723, 2.600 |                                                           |
| Val3 <sup>a</sup> | 8.047        | 4.190      | 2.151        | H $\gamma$ : 0.922                                        |
| Thr4 <sup>b</sup> | 8.307        | 4.312      | 4.131        | H $\gamma$ : 1.179                                        |
| Val5 <sup>c</sup> | 8.182        | 4.427      | 2.093        | H $\gamma$ : 0.969, 0.939                                 |
| <sup>L</sup> Pro6 |              | 4.401      | 2.309, 1.926 | H $\gamma$ : 2.059, 1.989; H $\delta$ : 3.887, 3.701      |
| Gly7 <sup>d</sup> | 8.454        | 3.950      |              |                                                           |
| Orn8              | 8.234        | 4.352      | 1.874        | H $\gamma$ : 1.759, 1.684; H $\delta$ : 3.010; NHt: 7.624 |
| Agb9 <sup>e</sup> | 8.546        | 4.433      | 2.051, 1.963 | H $\gamma$ : 3.281, 3.239; NHt: 7.227                     |
| Ile10             | 8.326        | 4.136      | 1.839        | H $\gamma$ : 1.467, 1.182, 0.892(Me); H $\delta$ : 0.854  |
| Leu11             | 8.416        | 4.384      | 1.647        | H $\gamma$ : 1.588; H $\delta$ : 0.925, 0.864             |
| Gln12             | 8.360        | 4.298      | 2.105, 1.977 | H $\gamma$ : 2.361; HNt: 7.532, 6.870                     |
| NH <sub>2</sub>   | 7.603, 7.113 |            |              |                                                           |

<sup>a</sup>The assignments for the minor Val3 spin system are 8.085(HN), 4.235(H $\alpha$ ), 2.178(H $\beta$ ), 0.926(H $\gamma$ ). <sup>b</sup>The assignments for the minor Thr4 spin system are 8.257(HN), 4.315 (H $\alpha$ ), 4.173(H $\beta$ ), 1.193(H $\gamma$ ). <sup>c</sup>The assignments for the minor Val5 spin system are 7.974(HN), 4.270(H $\alpha$ ), 1.990(H $\beta$ ), 0.902(H $\gamma$ ). <sup>d</sup>The assignments for the minor Gly7 spin system are 8.540(HN), 3.956, 3.912(H $\alpha$ ). <sup>e</sup>The assignments for the minor Agb9 spin system are 8.580(HN), 4.429 (H $\alpha$ ), 3.275, 3.240(H $\beta$ ), 2.048, 1.963(H $\gamma$ ).

**Table S19.** The <sup>1</sup>H Chemical Shift Assignments for Peptide HPDUGluAgb.

| Residue           | HN           | Hα    | Hβ           | Others                                  |
|-------------------|--------------|-------|--------------|-----------------------------------------|
| Ac                |              | 2.039 |              |                                         |
| Arg1              | 8.278        | 4.271 | 1.817        | Hγ: 1.733, 1.630; Hδ: 3.203; NHt: 7.215 |
| Glu2              | 8.544        | 4.336 | 2.032, 1.942 | Hγ: 2.286, 2.247                        |
| Val3 <sup>a</sup> | 8.258        | 4.164 | 2.079        | Hγ: 0.930                               |
| Thr4 <sup>b</sup> | 8.271        | 4.354 | 4.108        | Hγ: 1.162                               |
| Val5 <sup>c</sup> | 8.280        | 4.443 | 2.073        | Hγ: 0.970, 0.937                        |
| <sup>1</sup> Pro6 |              | 4.398 | 2.307, 1.926 | Hγ: 2.061, 1.987; Hδ: 3.883, 3.704      |
| Gly7 <sup>d</sup> | 8.457        | 3.952 |              |                                         |
| Orn8 <sup>e</sup> | 8.236        | 4.354 | 1.872        | Hγ: 1.759, 1.687; Hδ: 3.010; NHt: 7.627 |
| Agb9 <sup>f</sup> | 8.554        | 4.435 | 2.052, 1.962 | Hδ: 3.282, 3.239; NHt: 7.228            |
| Ile10             | 8.333        | 4.138 | 1.841        | Hγ: 1.470, 1.181, 0.893(Me); Hδ: 0.853  |
| Leu11             | 8.421        | 4.384 | 1.651        | Hγ: 1.587; Hδ: 0.927, 0.864             |
| Gln12             | 8.363        | 4.299 | 2.105, 1.978 | Hγ: 2.361; HNt: 7.533, 6.871            |
| NH <sub>2</sub>   | 7.606, 7.113 |       |              |                                         |

<sup>a</sup>The assignments for the minor Val3 spin system are 8.277(HN), 4.201(Hα), 2.501(Hβ), 0.949(Hγ). <sup>b</sup>The assignments for the minor Thr4 spin system are 8.212(HN), 4.354 (Hα), 4.164(Hβ), 1.177(Hγ). <sup>c</sup>The assignments for the minor Val5 spin system are 8.018(HN), 4.267(Hα), 1.986(Hβ), 0.900(Hγ). <sup>d</sup>The assignments for the minor Gly7 spin system are 8.544(HN), 3.971, 3.895(Hα). <sup>e</sup>The assignments for the minor Orn8 spin system are 8.418(HN), 4.333(Hα), 1.860(Hβ), 1.758(Hγ), 3.015(Hδ). <sup>f</sup>The assignments for the minor Agb9 spin system are 8.588(HN), 4.429(Hα), 2.047, 1.961(Hβ), 3.274, 3.240(Hγ).

**Table S20.** The <sup>1</sup>H Chemical Shift Assignments for Peptide HPDUAadAgb.

| Residue            | HN           | Hα    | Hβ           | Others                                 |
|--------------------|--------------|-------|--------------|----------------------------------------|
| Ac                 |              | 2.028 |              |                                        |
| Arg1               | 8.257        | 4.281 | 1.808, 1.735 | Hγ: 1.628; Hδ: 3.201; NHt: 7.210       |
| Aad2               | 8.413        | 4.339 | 1.769, 1.710 | Hγ: 1.533; Hδ: 2.225                   |
| Val3               | 8.266        | 4.164 | 2.062        | Hγ: 0.926                              |
| Thr4 <sup>a</sup>  | 8.253        | 4.350 | 4.101        | Hγ: 1.155                              |
| Val5 <sup>b</sup>  | 8.280        | 4.446 | 2.084        | Hγ: 0.971, 0.937                       |
| <sup>1</sup> Pro6  |              | 4.399 | 2.307, 1.930 | Hγ: 2.062, 1.989; Hδ: 3.881, 3.706     |
| Gly7 <sup>c</sup>  | 8.459        | 3.953 |              |                                        |
| Orn8               | 8.236        | 4.352 | 1.871, 1.768 | Hγ: 1.691; Hδ: 3.011; NHt: 7.631       |
| Agb9               | 8.556        | 4.436 | 2.052, 1.962 | Hγ: 3.284, 3.239; NHt: 7.230           |
| Ile10              | 8.333        | 4.140 | 1.841        | Hγ: 1.470, 1.181, 0.893(Me); Hδ: 0.854 |
| Leu11              | 8.421        | 4.386 | 1.641        | Hγ: 1.592; Hδ: 0.927, 0.864            |
| Gln12 <sup>d</sup> | 8.364        | 4.300 | 2.105, 1.977 | Hγ: 2.361; HNt: 7.533, 6.873           |
| NH <sub>2</sub>    | 7.606, 7.117 |       |              |                                        |

<sup>a</sup>The assignments for the minor Thr4 spin system are 8.208(HN), 4.347 (Hα), 4.161(Hβ), 1.169(Hγ). <sup>b</sup>The assignments for the minor Val5 spin system are 8.004(HN), 4.270(Hα), 1.986(Hβ), 0.899(Hγ). <sup>c</sup>The assignments for the minor Gly7 spin system are 8.555(HN), 3.974, 3.895(Hα). <sup>d</sup>The assignments for the minor Gln12 spin system are 7.917(HN), 4.170 (Hα), 2.080, 1.922(Hβ), 2.277(Hγ).

**Table S21.** The <sup>1</sup>H Chemical Shift Assignments for Peptide HPDUAspArg.

| Residue           | HN           | H $\alpha$   | H $\beta$    | Others                                                    |
|-------------------|--------------|--------------|--------------|-----------------------------------------------------------|
| Ac                |              | 2.041        |              |                                                           |
| Arg1              | 8.298        | 4.265        | 1.827, 1.753 | H $\gamma$ : 1.623; H $\delta$ : 3.197; HNt: 7.208        |
| Asp2              | 8.476        | 4.646        | 2.729, 2.607 |                                                           |
| Val3 <sup>a</sup> | 8.045        | 4.192        | 2.150        | H $\gamma$ : 0.921                                        |
| Thr4              | 8.304        | 4.316        | 4.128        | H $\gamma$ : 1.172                                        |
| Val5 <sup>b</sup> | 8.182        | 4.431        | 2.078        | H $\gamma$ : 0.969, 0.939                                 |
| <sup>L</sup> Pro6 |              | 4.391        | 2.365, 1.928 | H $\gamma$ : 2.062, 1.990; H $\delta$ : 3.884, 3.701      |
| Gly7 <sup>c</sup> | 8.450        | 3.972, 3.913 |              |                                                           |
| Orn8              | 8.192        | 4.361        | 1.872        | H $\gamma$ : 1.764, 1.683; H $\delta$ : 3.008; NHt: 7.620 |
| Arg9 <sup>d</sup> | 8.381        | 4.329        | 1.797, 1.744 | H $\gamma$ : 1.652, 1.580; H $\delta$ : 3.189; NHt: 7.188 |
| Ile10             | 8.308        | 4.136        | 1.837        | H $\gamma$ : 1.485, 1.178, 0.888 (Me); H $\delta$ : 0.851 |
| Leu11             | 8.392        | 4.380        | 1.637        | H $\gamma$ : 1.575; H $\delta$ : 0.923, 0.859             |
| Gln12             | 8.336        | 4.300        | 2.103, 1.985 | H $\gamma$ : 2.362; HNt: 7.530, 6.865                     |
| NH <sub>2</sub>   | 7.599, 7.110 |              |              |                                                           |

<sup>a</sup>The assignments for the minor Val3 spin system are 8.074(HN), 4.231 (H $\alpha$ ), .172(H $\beta$ ), 0.925(H $\gamma$ ); <sup>b</sup> Val5 spin system are 7.976(HN), 4.271(H $\alpha$ ), 1.987(H $\beta$ ), 0.901(H $\gamma$ ); <sup>c</sup>Gly7 spin system are 8.535(HN), 3.964, 3.898(H $\alpha$ ); <sup>d</sup>Arg9 spin system are 8.412(HN), 4.323(H $\alpha$ ), 1.794, 1.749(H $\beta$ ), 1.651, 1.585(H $\gamma$ ), 4.323(H $\delta$ ).

**Table S22.** The <sup>1</sup>H Chemical Shift Assignments for Peptide HPDUGluArg.

| Residue            | HN           | H $\alpha$   | H $\beta$    | Others                                                    |
|--------------------|--------------|--------------|--------------|-----------------------------------------------------------|
| Ac                 |              | 2.038        |              |                                                           |
| Arg1               | 8.272        | 4.271        | 1.731, 1.820 | H $\gamma$ : 1.627; H $\delta$ : 3.201; HNt: 7.210        |
| Glu2               | 8.535        | 4.341        | 2.039, 1.940 | H $\gamma$ : 2.254, 2.295                                 |
| Val3 <sup>a</sup>  | 8.252        | 4.166        | 2.080        | H $\gamma$ : 0.934                                        |
| Thr4 <sup>b</sup>  | 8.266        | 4.358        | 4.106        | H $\gamma$ : 1.162                                        |
| Val5               | 8.274        | 4.443        | 2.056        | H $\gamma$ : 0.970                                        |
| <sup>L</sup> Pro6  |              | 4.393        | 2.302, 1.930 | H $\gamma$ : 1.988, 2.062; H $\delta$ : 3.703, 3.879      |
| Gly7 <sup>c</sup>  | 8.451        | 3.918, 3.949 |              |                                                           |
| Orn8               | 8.192        | 4.361        | 1.750, 1.871 | H $\gamma$ : 1.683; H $\delta$ : 3.009; NHt: 7.624        |
| Arg9 <sup>d</sup>  | 8.389        | 4.328        | 1.743, 1.798 | H $\gamma$ : 1.644, 1.578; H $\delta$ : 3.190; NHt: 7.190 |
| Ile10              | 8.312        | 4.138        | 1.831        | H $\gamma$ : 1.497, 1.474, 0.888(Me) ; H $\delta$ : 0.850 |
| Leu11 <sup>e</sup> | 8.395        | 4.380        | 1.645        | H $\gamma$ : 1.579; H $\delta$ : 0.922, 0.858             |
| Gln12              | 8.338        | 4.299        | 2.095, 2.119 | H $\gamma$ : 2.363; HNt: 6.866, 7.530                     |
| NH <sub>2</sub>    | 7.600, 7.111 |              |              |                                                           |

<sup>a</sup>The assignments for the minor <sup>a</sup>Val3 spin system are 8.020(HN), 4.265(H $\alpha$ ), 2.036(H $\beta$ ), 0.900(H $\gamma$ ); <sup>b</sup>Thr4 spin system are 8.231(HN), 4.358(H $\alpha$ ), 4.162(H $\beta$ ), 1.176(H $\gamma$ ); <sup>c</sup>Gly7 spin system are 8.539(HN), 3.979, 3.884(H $\alpha$ ); <sup>d</sup>Arg9 spin system are 8.362(HN), 4.347(H $\alpha$ ), 1.855(H $\beta$ ), 1.751(H $\gamma$ ); <sup>e</sup>Leu11 spin system are 8.424(HN), 4.322(H $\alpha$ ), 1.769(H $\beta$ ), 1.593(H $\gamma$ ).

**Table S23.** The <sup>1</sup>H Chemical Shift Assignments for Peptide HPDUAadArg.

| Residue            | HN           | Hα    | Hβ           | Others                                  |
|--------------------|--------------|-------|--------------|-----------------------------------------|
| Ac                 |              | 2.026 |              |                                         |
| Arg1               | 8.253        | 4.279 | 1.806, 1.733 | Hγ: 1.626; Hδ: 3.200; HNt: 7.209        |
| Aad2               | 8.408        | 4.349 | 1.764, 1.710 | Hγ: 1.531; Hδ: 2.221                    |
| Val3 <sup>a</sup>  | 8.263        | 4.165 | 2.056        | Hγ: 0.930                               |
| Thr4 <sup>b</sup>  | 8.250        | 4.352 | 4.099        | Hγ: 1.156                               |
| Val5               | 8.275        | 4.446 | 2.084        | Hγ: 0.970                               |
| <sup>L</sup> Pro6  |              | 4.392 | 2.307, 1.929 | Hγ: 2.065, 1.988; Hδ: 3.881, 3.706      |
| Gly7 <sup>c</sup>  | 8.454        | 3.946 |              |                                         |
| Orn8               | 8.194        | 4.356 | 1.871        | Hγ: 1.754, 1.685; Hδ: 3.010; NHt: 7.625 |
| Arg9 <sup>d</sup>  | 8.393        | 4.329 | 1.792        | Hγ: 1.739; Hδ: 3.190; NHt: 7.190        |
| Ile10              | 8.315        | 4.139 | 1.838        | Hγ: 1.484, 1.186, 0.888(Me); Hδ: 0.850  |
| Leu11              | 8.400        | 4.382 | 1.642        | Hγ: 1.581; Hδ: 0.922, 0.858             |
| Gln12 <sup>e</sup> | 8.341        | 4.299 | 2.105, 1.982 | Hγ: 2.362; HNt: 7.532, 6.867            |
| NH <sub>2</sub>    | 7.603, 7.111 |       |              |                                         |

<sup>a</sup>The assignments for the minor Val3 spin system are 7.921(HN), 4.181(Hα), 1.899(Hβ), 0.814(Hγ); <sup>b</sup>Thr4 spin system are 8.124(HN), 4.261(Hα), 4.071(Hβ), 1.085(Hγ); <sup>c</sup>Gly7 spin system are 8.462(HN), 3.892, 3.797(Hα); <sup>d</sup>Arg9 spin system are 8.342(HN), 4.222(Hα), 1.711(Hβ), 1.658(Hγ); <sup>e</sup>Gln12 spin system are 8.2685(HN), 4.255(Hα), 1.662 (Hβ), 1.773 (Hγ).

**Table S24.** The <sup>1</sup>H Chemical Shift Assignments for Peptide HPDUAspAgh.

| Residue           | HN           | Hα    | Hβ           | Others                                             |
|-------------------|--------------|-------|--------------|----------------------------------------------------|
| Ac                |              | 2.039 |              |                                                    |
| Arg1              | 8.301        | 4.264 | 1.810, 1.732 | Hγ: 1.622; Hδ: 3.195; NHt: 7.211                   |
| Asp2              | 8.478        | 4.643 | 2.724, 2.599 |                                                    |
| Val3 <sup>a</sup> | 8.048        | 4.191 | 2.151        | Hγ: 0.921                                          |
| Thr4 <sup>b</sup> | 8.308        | 4.312 | 4.129        | Hγ: 1.178                                          |
| Val5 <sup>c</sup> | 8.185        | 4.428 | 2.074        | Hγ: 0.968, 0.939                                   |
| <sup>L</sup> Pro6 |              | 4.391 | 2.307, 1.927 | Hγ: 2.060, 1.991; Hδ: 3.886, 3.699                 |
| Gly7 <sup>d</sup> | 8.454        | 3.943 |              |                                                    |
| Orn8              | 8.181        | 4.355 | 1.868        | Hγ: 1.733; Hδ: 3.008; NHt: 7.622                   |
| Agh9 <sup>e</sup> | 8.335        | 4.291 | 1.754, 1.721 | Hγ: 1.589; Hδ: 1.393, 1.345; Hε: 3.162; NHt: 7.145 |
| Ile10             | 8.274        | 4.132 | 1.834        | Hγ: 1.484, 1.187 0.886(Me); Hδ: 0.849              |
| Leu11             | 8.372        | 4.372 | 1.648.       | Hγ: 1.580; Hδ: 0.925, 0.861                        |
| Gln12             | 8.328        | 4.293 | 2.108, 1.976 | Hγ: 2.363; HNt: 7.535, 6.866                       |
| NH <sub>2</sub>   | 7.600, 7.113 |       |              |                                                    |

<sup>a</sup>The assignments for the minor Val3 spin system are 8.076(HN), 4.227(Hα), 2.167(Hβ), 0.921(Hγ); <sup>b</sup>The assignments for the minor Thr4 spin system are 8.259(HN), 4.313(Hα), 4.132(Hβ), 1.187(Hγ); <sup>c</sup>The assignments for the minor Val5 spin system are 7.978(HN), 4.266(Hα), 1.985(Hβ), 0.898(Hγ); <sup>d</sup>The assignments for the minor Gly7 spin system are 8.541(HN), 3.961, 3.898(Hα); <sup>e</sup>The assignments for the minor Agh9 spin system are 8.364 (HN), 4.291(Hα), 1.848(Hβ), 1.737(Hγ), 1.387, 1.351(Hδ), 3.008(Hε).

**Table S25.** The <sup>1</sup>H Chemical Shift Assignments for Peptide HPDUGluAgh.

| Residue           | HN           | Hα    | Hβ           | Others                                                       |
|-------------------|--------------|-------|--------------|--------------------------------------------------------------|
| Ac                |              | 2.040 |              |                                                              |
| Arg1              | 8.276        | 4.271 | 1.811        | Hγ: 1.734, 1.631; Hδ: 3.203; NHt: 7.217                      |
| Glu2              | 8.543        | 4.338 | 2.038, 1.939 | Hγ: 2.289, 2.247                                             |
| Val3              | 8.256        | 4.168 | 2.075        | Hγ: 0.927                                                    |
| Thr4 <sup>a</sup> | 8.270        | 4.357 | 4.108        | Hγ: 1.165                                                    |
| Val5 <sup>b</sup> | 8.278        | 4.445 | 2.060        | Hγ: 0.970, 0.889                                             |
| <sup>L</sup> Pro6 |              | 4.393 | 2.308, 1.929 | Hγ: 2.065, 1.988; Hδ: 3.883, 3.702                           |
| Gly7 <sup>c</sup> | 8.457        | 3.947 |              |                                                              |
| Orn8              | 8.181        | 4.357 | 1.870        | Hγ: 1.757, 1.696; Hδ: 3.009; NHt: 7.626                      |
| Agh9 <sup>d</sup> | 8.342        | 4.293 | 1.756, 1.722 | Hγ: 1.590; Hδ: 1.394, 1.346;<br>Hε: 3.165, 3.014; NHt: 7.150 |
| Ile10             | 8.278        | 4.136 | 1.835        | Hγ: 1.488, 1.190, 0.935(Me); Hδ: 0.852                       |
| Leu11             | 8.376        | 4.374 | 1.646        | Hγ: 1.583; Hδ: 0.925, 0.861                                  |
| Gln12             | 8.328        | 4.299 | 2.109, 1.977 | Hγ: 2.363; HNt: 7.536, 6.867                                 |
| NH <sub>2</sub>   | 7.600, 7.115 |       |              |                                                              |

<sup>a</sup>The assignments for the minor Thr4 spin system are 8.218(HN), 4.357(Hα), 4.161(Hβ), 1.177(Hγ); <sup>b</sup>The assignments for the minor Val5 spin system are 8.023(HN), 4.266(Hα), 1.987(Hβ), 0.903(Hγ); <sup>c</sup>The assignments for the minor Gly7 spin system are 8.548(HN), 3.975, 3.886(Hα). <sup>d</sup>The assignments for the minor Agh9 spin system are 8.377(HN), 4.288(Hα), 1.727(Hβ), 1.388, 1.351(Hδ), 3.171(Hε).

**Table S26.** The <sup>1</sup>H Chemical Shift Assignments for Peptide HPDUAadAgh.

| Residue           | HN           | Hα    | Hβ           | Others                                                |
|-------------------|--------------|-------|--------------|-------------------------------------------------------|
| Ac                |              | 2.028 |              |                                                       |
| Arg1              | 8.256        | 4.279 | 1.805, 1.733 | Hγ: 1.626; Hδ: 3.200; NHt: 7.208                      |
| Aad2              | 8.413        | 4.338 | 1.768, 1.708 | Hγ: 1.622, 1.532; Hδ: 2.222                           |
| Val3 <sup>a</sup> | 8.268        | 4.163 | 2.060        | Hγ: 0.918                                             |
| Thr4 <sup>b</sup> | 8.253        | 4.350 | 4.099        | Hγ: 1.156                                             |
| Val5 <sup>c</sup> | 8.279        | 4.446 | 2.095        | Hγ: 0.889                                             |
| <sup>L</sup> Pro6 |              | 4.396 | 2.307, 1.930 | Hγ: 2.063, 1.988; Hδ: 3.882, 3.704                    |
| Gly7 <sup>d</sup> | 8.456        | 3.947 |              |                                                       |
| Orn8              | 8.181        | 4.357 | 1.869        | Hγ: 1.757, 1.702; Hδ: 3.009; NHt: 7.622               |
| Agh9              | 8.343        | 4.293 | 1.753, 1.723 | Hγ: 1.593; Hδ: 1.393, 1.345; Hε: 3.165;<br>NHt: 7.149 |
| Ile10             | 8.279        | 4.133 | 1.837        | Hγ: 1.487, 1.184, 0.935(Me); Hδ: 0.848                |
| Leu11             | 8.377        | 4.377 | 1.649        | Hγ: 1.582; Hδ: 0.926, 0.861                           |
| Gln12             | 8.328        | 4.299 | 2.108, 1.977 | Hγ: 2.363; HNt: 7.536, 6.867                          |
| NH <sub>2</sub>   | 7.602, 7.115 |       |              |                                                       |

<sup>a</sup>The assignments for the minor Val3 spin system are 8.113(HN), 4.200(Hα), 2.072(Hβ), 0.925(Hγ); <sup>b</sup>The assignments for the minor Thr4 spin system are 8.210(HN), 4.349(Hα), 4.159(Hβ), 1.169(Hγ); <sup>c</sup>The assignments for the minor Val5 spin system are 8.010(HN), 4.268(Hα), 1.985(Hβ), 0.899(Hγ); <sup>d</sup>The assignments for the minor Gly7 spin system are 8.556(HN), 3.976, 3.885(Hα).

**Table S27.** The <sup>1</sup>H Chemical Shift Assignments for Peptide HPDFAspAgp.

| Residue           | HN           | H $\alpha$   | H $\beta$    | Others                                                    |
|-------------------|--------------|--------------|--------------|-----------------------------------------------------------|
| Ac                |              | 2.073        |              |                                                           |
| Cys1              | 8.481        | 5.145        | 3.157, 2.595 |                                                           |
| Arg2              | 8.720        | 4.555        | 1.778        | H $\gamma$ : 1.616; H $\delta$ : 3.188; NHt: 7.159        |
| Aasp3             | 8.557        | 4.943        | 2.676, 2.406 |                                                           |
| Val4              | 8.972        | 4.402        | 2.048        | H $\gamma$ : 0.862                                        |
| Thr5              | 8.463        | 4.948        | 3.978        | H $\gamma$ : 1.067                                        |
| Val6              | 8.767        | 4.589        | 1.929        | H $\gamma$ : 0.905, 0.878                                 |
| <sup>D</sup> Pro7 |              | 4.364        | 2.350, 1.968 | H $\gamma$ : 2.146, 2.039; H $\delta$ : 3.867, 3.780      |
| Gly8              | 8.543        | 3.960, 3.834 |              |                                                           |
| Orn9              | 8.043        | 4.676        | 1.863        | H $\gamma$ : 1.735, 1.685; H $\delta$ : 3.013; NHt: 7.642 |
| Agp10             | 8.689        | 5.153        | 3.830, 3.359 | HNt: 7.535                                                |
| Ile11             | 9.187        | 4.418        | 1.820        | H $\gamma$ : 1.349, 1.087, 0.846(Me); H $\delta$ : 0.797  |
| Leu12             | 8.356        | 4.859        | 1.545        | H $\gamma$ : 1.483; H $\delta$ : 0.797                    |
| Gln13             | 9.167        | 4.640        | 2.102, 1.922 | H $\gamma$ : 2.302, 2.245; HNt: 7.324, 6.860              |
| Cys14             | 9.050        | 5.065        | 3.134, 3.011 |                                                           |
| NH <sub>2</sub>   | 7.632, 7.267 |              |              |                                                           |

**Table S28.** The <sup>1</sup>H Chemical Shift Assignments for Peptide HPDFGluAgp.

| Residue           | HN           | H $\alpha$   | H $\beta$    | Others                                                    |
|-------------------|--------------|--------------|--------------|-----------------------------------------------------------|
| Ac                |              | 2.076        |              |                                                           |
| Cys1              | 8.483        | 5.187        | 3.173, 3.002 |                                                           |
| Arg2              | 8.737        | 4.607        | 1.813        | H $\gamma$ : 1.651, 1.565; H $\delta$ : 3.185; NHt: 7.154 |
| Glu3              | 8.717        | 4.852        | 1.882        | H $\gamma$ : 2.167, 2.058                                 |
| Val4              | 8.994        | 4.545        | 2.055        | H $\gamma$ : 0.870, 0.816                                 |
| Thr5              | 8.536        | 5.102        | 3.950        | H $\gamma$ : 1.045                                        |
| Val6              | 8.733        | 4.619        | 1.931        | H $\gamma$ : 0.918, 0.885                                 |
| <sup>D</sup> Pro7 |              | 4.358        | 2.368, 1.968 | H $\gamma$ : 2.147, 2.048; H $\delta$ : 3.877, 3.818      |
| Gly8              | 8.535        | 3.985, 3.776 |              |                                                           |
| Orn9              | 8.023        | 4.666        | 1.853        | H $\gamma$ : 1.732, 1.673; H $\delta$ : 3.009; NHt: 7.642 |
| Agp10             | 8.844        | 5.129        | 3.574, 3.438 | HNt: 7.470                                                |
| Ile11             | 9.074        | 4.508        | 1.831        | H $\gamma$ : 1.301, 1.057, 0.839(Me); H $\delta$ : 0.792  |
| Leu12             | 8.458        | 4.760        | 1.582, 1.538 | H $\gamma$ : 1.479; H $\delta$ : 0.806                    |
| Gln13             | 9.132        | 4.638        | 2.103, 1.901 | H $\gamma$ : 2.268, 2.225; HNt: 7.397, 6.850              |
| Cys14             | 9.045        | 5.079        | 3.134, 3.002 |                                                           |
| NH <sub>2</sub>   | 7.623, 7.265 |              |              |                                                           |



**Table S29.** The <sup>1</sup>H Chemical Shift Assignments for Peptide HPDFAadAgp.

| Residue           | HN           | H $\alpha$   | H $\beta$    | Others                                                    |
|-------------------|--------------|--------------|--------------|-----------------------------------------------------------|
| Ac                |              | 2.078        |              |                                                           |
| Cys1              | 8.482        | 5.207        | 3.174, 2.597 |                                                           |
| Arg2              | 8.757        | 4.625        | 1.805        | H $\gamma$ : 1.647, 1.559; H $\delta$ : 3.180; NHt: 7.148 |
| Aad3              | 8.678        | 4.844        | 1.649        | H $\gamma$ : 1.541, 1.431; H $\delta$ : 2.089             |
| Val4              | 8.963        | 4.535        | 2.054, 2.021 | H $\gamma$ : 0.870, 0.822                                 |
| Thr5              | 8.581        | 5.070        | 3.969        | H $\gamma$ : 1.051                                        |
| Val6              | 8.751        | 4.611        | 1.938        | H $\gamma$ : 0.917, 0.886                                 |
| <sup>D</sup> Pro7 |              | 4.358        | 2.365, 1.966 | H $\gamma$ : 2.148, 2.043; H $\delta$ : 3.874, 3.807      |
| Gly8              | 8.538        | 3.980, 3.790 |              |                                                           |
| Orn9              | 8.005        | 4.678        | 1.854        | H $\gamma$ : 1.727, 1.677; H $\delta$ : 3.010; NHt: 7.639 |
| Agp10             | 8.875        | 5.227        |              | NHt: 7.418                                                |
| Ile11             | 9.048        | 4.551        | 1.837        | H $\gamma$ : 1.303, 1.049, 0.846(Me); H $\delta$ : 0.797  |
| Leu12             | 8.464        | 4.777        | 1.609        | H $\gamma$ : 1.517, 1.466; H $\delta$ : 0.813, 0.786      |
| Gln13             | 9.173        | 4.645        | 2.111, 1.893 | H $\gamma$ : 2.268, 2.225; HNt: 7.413, 6.850              |
| Cys14             | 9.056        | 5.091        | 3.129, 3.003 |                                                           |
| NH <sub>2</sub>   | 7.618, 7.266 |              |              |                                                           |

**Table S30.** The <sup>1</sup>H Chemical Shift Assignments for Peptide HPDFAspAgb.

| Residue           | HN           | H $\alpha$   | H $\beta$    | Others                                                    |
|-------------------|--------------|--------------|--------------|-----------------------------------------------------------|
| Ac                |              | 2.071        |              |                                                           |
| Cys1              | 8.448        | 5.156        | 3.156, 2.643 |                                                           |
| Arg2              | 8.726        | 4.602        | 1.821, 1.786 | H $\gamma$ : 1.651, 1.577; H $\delta$ : 3.185; NHt: 7.140 |
| Asp3              | 8.519        | 5.091        | 2.500, 2.458 |                                                           |
| Val4              | 8.862        | 4.474        | 2.041        | H $\gamma$ : 0.872, 0.838                                 |
| Thr5              | 8.514        | 5.013        | 3.976        | H $\gamma$ : 1.030                                        |
| Val6              | 8.895        | 4.607        | 1.927        | H $\gamma$ : 0.926, 0.897                                 |
| <sup>D</sup> Pro7 |              | 4.350        | 2.374, 1.963 | H $\gamma$ : 2.148, 2.047; H $\delta$ : 3.879, 3.831      |
| Gly8              | 8.407        | 4.011, 3.732 |              |                                                           |
| Orn9              | 7.947        | 4.693        | 1.870, 1.806 | H $\gamma$ : 1.696; H $\delta$ : 3.014; NHt: 7.624        |
| Agb10             | 8.634        | 4.906        | 1.919        | H $\gamma$ : 3.269, 3.169; NHt: 7.585                     |
| Ile11             | 9.114        | 4.457        | 1.839        | H $\gamma$ : 1.330, 1.099, 0.850(Me); H $\delta$ : 0.799  |
| Leu12             | 8.290        | 4.788        | 1.607        | H $\gamma$ : 1.513, 1.459; H $\delta$ : 0.819, 0.791      |
| Gln13             | 9.091        | 4.641        | 2.107, 1.898 | H $\gamma$ : 2.285, 2.228; HNt: 7.378, 6.836              |
| Cys14             | 9.001        | 5.049        | 3.127, 3.009 |                                                           |
| NH <sub>2</sub>   | 7.610, 7.243 |              |              |                                                           |

**Table S31.** The <sup>1</sup>H Chemical Shift Assignments for Peptide HPDFGluAgb.

| Residue           | HN           | H $\alpha$   | H $\beta$    | Others                                                    |
|-------------------|--------------|--------------|--------------|-----------------------------------------------------------|
| Ac                |              | 2.079        |              |                                                           |
| Cys1              | 8.456        | 5.211        | 3.176, 2.618 |                                                           |
| Arg2              | 8.733        | 4.622        | 1.829, 1.785 | H $\gamma$ : 1.660, 1.551; H $\delta$ : 3.182; NHt: 7.136 |
| Glu3              | 8.701        | 4.951        | 1.888, 1.802 | H $\gamma$ : 2.198, 2.027                                 |
| Val4              | 8.965        | 4.535        | 2.033        | H $\gamma$ : 0.867, 0.809                                 |
| Thr5              | 8.661        | 5.024        | 4.001        | H $\gamma$ : 1.025                                        |
| Val6              | 8.972        | 4.613        | 1.929        | H $\gamma$ : 0.927, 0.892                                 |
| <sup>D</sup> Pro7 |              | 4.349        | 2.375, 1.962 | H $\gamma$ : 2.159, 2.046; H $\delta$ : 3.889, 3.820      |
| Gly8              | 8.393        | 4.006, 3.734 |              |                                                           |
| Orn9              | 7.945        | 4.712        | 1.856, 1.797 | H $\gamma$ : 1.694; H $\delta$ : 3.010; NHt: 7.623        |
| Agb10             | 8.691        | 4.977        | 1.914, 1.802 | H $\delta$ : 3.265, 3.147; NHt: 7.164                     |
| Ile11             | 9.171        | 4.529        | 1.845        | H $\gamma$ : 1.318, 1.085, 0.852(Me); H $\delta$ : 0.794  |
| Leu12             | 8.400        | 4.699        | 1.614        | H $\gamma$ : 1.529, 1.472; H $\delta$ : 0.815, 0.792      |
| Gln13             | 9.133        | 4.648        | 2.097, 1.893 | H $\gamma$ : 2.268, 2.217; HNt: 7.361, 6.831              |
| Cys14             | 9.013        | 5.087        | 3.127, 3.000 |                                                           |
| NH <sub>2</sub>   | 7.599, 7.244 |              |              |                                                           |

**Table S32.** The <sup>1</sup>H Chemical Shift Assignments for Peptide HPDFAadAgb.

| Residue           | HN           | H $\alpha$   | H $\beta$    | Others                                                    |
|-------------------|--------------|--------------|--------------|-----------------------------------------------------------|
| Ac                |              | 2.079        |              |                                                           |
| Cys1              | 8.455        | 5.238        | 3.165, 2.612 |                                                           |
| Arg2              | 8.753        | 4.638        | 1.805        | H $\gamma$ : 1.657, 1.535; H $\delta$ : 3.176; NHt: 7.125 |
| Aad3              | 8.660        | 4.979        | 1.686, 1.572 | H $\gamma$ : 1.486, 1.405; H $\delta$ : 2.106, 2.028      |
| Val4              | 8.959        | 4.522        | 2.024        | H $\gamma$ : 0.862, 0.808                                 |
| Thr5              | 8.690        | 5.009        | 4.012        | H $\gamma$ : 1.029                                        |
| Val6              | 9.006        | 4.604        | 1.928        | H $\gamma$ : 0.926, 0.892                                 |
| <sup>D</sup> Pro7 |              | 4.348        | 2.375, 1.962 | H $\gamma$ : 2.162, 2.045; H $\delta$ : 3.889, 3.815      |
| Gly8              | 8.382        | 4.004, 3.735 |              |                                                           |
| Orn9              | 7.937        | 4.722        | 1.857, 1.792 | H $\gamma$ : 1.694; H $\delta$ : 3.011; NHt: 7.620        |
| Agb10             | 8.697        | 5.002        | 1.943, 1.717 | H $\gamma$ : 3.289, 3.155; NHt: 7.282                     |
| Ile11             | 9.179        | 4.554        | 1.844        | H $\gamma$ : 1.322, 1.083, 0.857(Me); H $\delta$ : 0.798  |
| Leu12             | 8.419        | 4.667        | 1.656        | H $\gamma$ : 1.480, 1.442; H $\delta$ : 0.815             |
| Gln13             | 9.164        | 4.651        | 2.102, 1.888 | H $\gamma$ : 2.273, 2.213; HNt: 7.365, 6.832              |
| Cys14             | 9.012        | 5.094        | 3.121, 2.999 |                                                           |
| NH <sub>2</sub>   | 7.589, 7.243 |              |              |                                                           |

**Table S33.** The <sup>1</sup>H Chemical Shift Assignments for Peptide HPDFAspArg.

| Residue           | HN           | H $\alpha$   | H $\beta$    | Others                                                    |
|-------------------|--------------|--------------|--------------|-----------------------------------------------------------|
| Ac                |              | 2.035        |              |                                                           |
| Cys1              | 8.440        | 5.121        | 3.149, 2.680 |                                                           |
| Arg2              | 8.714        | 4.587        | 1.804, 1.653 | H $\gamma$ : 1.584; H $\delta$ : 3.188; HNt: 7.140        |
| Asp3              | 8.498        | 5.086        | 2.514, 2.479 |                                                           |
| Val4              | 8.858        | 4.475        | 2.035        | H $\gamma$ : 0.881, 0.853                                 |
| Thr5              | 8.445        | 5.033        | 3.943        | H $\gamma$ : 1.002                                        |
| Val6              | 8.849        | 4.617        | 1.957        | H $\gamma$ : 0.928, 0.901                                 |
| <sup>D</sup> Pro7 |              | 4.352        | 2.372, 1.965 | H $\gamma$ : 2.143, 2.047; H $\delta$ : 3.872, 3.842      |
| Gly8              | 8.450        | 4.007, 3.726 |              |                                                           |
| Orn9              | 7.957        | 4.643        | 1.833        | H $\gamma$ : 1.681; H $\delta$ : 3.008; NHt: 7.618        |
| Arg10             | 8.548        | 4.810        | 1.751, 1.669 | H $\gamma$ : 1.565, 1.452; H $\delta$ : 3.094; NHt: 7.404 |
| Ile11             | 9.121        | 4.445        | 1.838        | H $\gamma$ : 1.351, 1.105, 0.851(Me); H $\delta$ : 0.789  |
| Leu12             | 8.279        | 4.762        | 1.634        | H $\gamma$ : 1.505; H $\delta$ : 0.815                    |
| Gln13             | 9.056        | 4.646        | 2.109, 1.902 | H $\gamma$ : 2.289, 2.238; HNt: 7.384, 6.836              |
| Cys14             | 8.972        | 5.025        | 3.135, 3.003 |                                                           |
| NH <sub>2</sub>   | 7.624, 7.237 |              |              |                                                           |

**Table S34.** The <sup>1</sup>H Chemical Shift Assignments for Peptide HPDFGluArg.

| Residue           | HN           | H $\alpha$   | H $\beta$    | Others                                                    |
|-------------------|--------------|--------------|--------------|-----------------------------------------------------------|
| Ac                |              | 2.076        |              |                                                           |
| Cys1              | 8.449        | 5.198        | 2.616, 3.171 |                                                           |
| Arg2              | 8.725        | 4.608        | 1.817        | H $\gamma$ : 1.557, 1.655; H $\delta$ : 3.184; HNt: 7.141 |
| Glu3              | 8.693        | 4.967        | 1.859, 1.881 | H $\gamma$ : 2.016, 2.174                                 |
| Val4              | 9.019        | 4.530        | 2.037        | H $\gamma$ : 0.814, 0.869                                 |
| Thr5              | 8.490        | 5.064        | 3.954        | H $\gamma$ : 1.010                                        |
| Val6              | 8.902        | 4.625        | 1.943        | H $\gamma$ : 0.891, 0.921                                 |
| <sup>D</sup> Pro7 |              | 4.350        | 1.963, 2.370 | H $\gamma$ : 2.046, 2.154; H $\delta$ : 3.827, 3.880      |
| Gly8              | 8.448        | 4.002, 3.737 |              |                                                           |
| Orn9              | 7.963        | 4.647        | 1.830        | H $\gamma$ : 1.705, 1.602; H $\delta$ : 3.005; NHt: 7.622 |
| Arg10             | 8.541        | 4.852        | 1.644        | H $\gamma$ : 1.460, 1.549; H $\delta$ : 3.090; NHt: 7.223 |
| Ile11             | 9.164        | 4.503        | 1.832        | H $\gamma$ : 1.330, 1.086, 0.843(Me); H $\delta$ : 0.789  |
| Leu12             | 8.403        | 4.735        | 1.600        | H $\gamma$ : 1.543, 1.491; H $\delta$ : 0.810             |
| Gln13             | 9.124        | 4.648        | 1.906, 2.105 | H $\gamma$ : 2.223, 2.271; HNt: 6.8288, 7.347             |
| Cys14             | 9.003        | 5.085        | 3.005, 3.132 |                                                           |
| NH <sub>2</sub>   | 7.242, 7.605 |              |              |                                                           |

**Table S35.** The <sup>1</sup>H Chemical Shift Assignments for Peptide HPDFAadArg.

| Residue           | HN           | H $\alpha$   | H $\beta$    | Others                                                    |
|-------------------|--------------|--------------|--------------|-----------------------------------------------------------|
| Ac                |              | 2.078        |              |                                                           |
| Cys1              | 8.448        | 5.230        | 3.169, 2.617 |                                                           |
| Arg2              | 8.753        | 4.624        | 1.808        | H $\gamma$ : 1.652, 1.544; H $\delta$ : 3.179; HNt: 7.130 |
| Aad3              | 8.630        | 4.953        | 1.692, 1.540 | H $\gamma$ : 1.438; H $\delta$ : 2.126, 2.048             |
| Val4              | 9.006        | 4.513        | 2.024        | H $\gamma$ : 0.867, 0.821                                 |
| Thr5              | 8.522        | 5.014        | 3.970        | H $\gamma$ : 1.023                                        |
| Val6              | 8.938        | 4.611        | 1.936        | H $\gamma$ : 0.919, 0.890                                 |
| <sup>D</sup> Pro7 |              | 4.351        | 2.366, 1.965 | H $\gamma$ : 2.151, 2.044; H $\delta$ : 3.879, 3.814      |
| Gly8              | 8.449        | 3.990, 3.756 |              |                                                           |
| Orn9              | 7.960        | 4.667        | 1.828        | H $\gamma$ : 1.684; H $\delta$ : 3.001; NHt: 7.614        |
| Arg10             | 8.556        | 4.912        | 1.677        | H $\gamma$ : 1.563, 1.511; H $\delta$ : 3.090; NHt: 7.227 |
| Ile11             | 9.141        | 4.546        | 1.834        | H $\gamma$ : 1.329, 1.085, 0.848(Me); H $\delta$ : 0.794  |
| Leu12             | 8.414        | 4.693        | 1.659        | H $\gamma$ : 1.481; H $\delta$ : 0.820, 0.772             |
| Gln13             | 9.157        | 4.661        | 2.106, 1.888 | H $\gamma$ : 2.277, 2.220; HNt: 7.359, 6.828              |
| Cys14             | 9.002        | 5.094        | 3.123, 3.002 |                                                           |
| NH <sub>2</sub>   | 7.596, 7.541 |              |              |                                                           |

**Table S36.** The <sup>1</sup>H Chemical Shift Assignments for Peptide HPDFAspAgh.

| Residue           | HN           | H $\alpha$   | H $\beta$    | Others                                                                          |
|-------------------|--------------|--------------|--------------|---------------------------------------------------------------------------------|
| Ac                |              | 2.066        |              |                                                                                 |
| Cys1              | 8.437        | 5.092        | 3.136, 2.715 |                                                                                 |
| Arg2              | 8.695        | 4.602        | 1.834, 1.781 | H $\gamma$ : 1.656, 1.570; H $\delta$ : 3.187; NHt: 7.141                       |
| Asp3              | 8.490        | 5.070        | 2.469        |                                                                                 |
| Val4              | 8.876        | 4.434        | 2.026        | H $\gamma$ : 0.875                                                              |
| Thr5              | 8.450        | 4.989        | 3.932        | H $\gamma$ : 1.014                                                              |
| Val6              | 8.856        | 4.611        | 1.957        | H $\gamma$ : 0.925, 0.906                                                       |
| <sup>D</sup> Pro7 |              | 4.355        | 2.370, 2.140 | H $\gamma$ : 2.048, 1.972; H $\delta$ : 3.868, 3.839                            |
| Gly8              | 8.450        | 4.434, 4.004 |              |                                                                                 |
| Orn9              | 7.946        | 4.641        | 1.832        | H $\gamma$ : 1.681; H $\delta$ : 3.008; NHt: 7.615                              |
| Agh10             | 8.497        | 4.749        | 1.663        | H $\gamma$ : 1.479; H $\delta$ : 1.343, 1.231; H $\epsilon$ : 3.076; NHt: 7.164 |
| Ile11             | 9.051        | 4.426        | 1.840        | H $\gamma$ : 1.351, 1.124, 0.859(Me); H $\delta$ : 0.797                        |
| Leu12             | 8.274        | 4.714        | 1.651        | H $\gamma$ : 1.491; H $\delta$ : 0.837, 0.808                                   |
| Gln13             | 9.028        | 4.647        | 2.111, 1.896 | H $\gamma$ : 2.289, 2.241; HNt: 7.399, 6.841                                    |
| Cys14             | 8.959        | 4.990        | 3.129, 3.002 |                                                                                 |
| NH <sub>2</sub>   | 7.633, 7.240 |              |              |                                                                                 |

**Table S37.** The  $^1\text{H}$  Chemical Shift Assignments for Peptide HPDFGluAgh.

| Residue            | HN           | H $\alpha$   | H $\beta$    | Others                                                                                    |
|--------------------|--------------|--------------|--------------|-------------------------------------------------------------------------------------------|
| Ac                 |              | 2.077        |              |                                                                                           |
| Cys1               | 8.452        | 5.193        | 3.172, 2.611 |                                                                                           |
| Arg2               | 8.727        | 4.613        | 1.812        | H $\gamma$ : 1.658, 1.560; H $\delta$ : 3.184; NHt: 7.141                                 |
| Glu3               | 8.689        | 4.922        | 1.900, 1.853 | H $\gamma$ : 2.187, 2.010                                                                 |
| Val4               | 9.032        | 4.513        | 2.032        | H $\gamma$ : 0.870, 0.819                                                                 |
| Thr5               | 8.464        | 5.013        | 3.951        | H $\gamma$ : 1.021                                                                        |
| Val6               | 8.927        | 4.609        | 1.941        | H $\gamma$ : 0.917, 0.890                                                                 |
| $^{\text{D}}$ Pro7 |              | 4.350        | 2.370, 1.963 | H $\gamma$ : 2.149, 2.048; H $\delta$ : 3.899, 3.823                                      |
| Gly8               | 8.437        | 4.000, 3.741 |              |                                                                                           |
| Orn9               | 7.941        | 4.665        | 1.832        | H $\gamma$ : 1.687; H $\delta$ : 3.011; NHt: 7.618                                        |
| Agh10              | 8.473        | 4.852        | 1.680, 1.579 | H $\gamma$ : 1.501, 1.414; H $\delta$ : 1.336, 1.247;<br>H $\epsilon$ : 3.060; NHt: 7.085 |
| Ile11              | 9.158        | 4.484        | 1.828        | H $\gamma$ : 1.330, 1.102, 0.846(Me); H $\delta$ : 0.792                                  |
| Leu12              | 8.386        | 4.748        | 1.593        | H $\gamma$ : 1.541, 1.492; H $\delta$ : 0.807                                             |
| Gln13              | 9.129        | 4.648        | 2.103, 1.904 | H $\gamma$ : 2.272, 2.224; HNt: 7.346, 6.831                                              |
| Cys14              | 9.016        | 5.081        | 3.133, 3.006 |                                                                                           |
| NH $_2$            | 7.607, 7.243 |              |              |                                                                                           |

**Table S38.** The  $^1\text{H}$  Chemical Shift Assignments for Peptide HPDFAadAgh.

| Residue            | HN           | H $\alpha$   | H $\beta$    | Others                                                                                    |
|--------------------|--------------|--------------|--------------|-------------------------------------------------------------------------------------------|
| Ac                 |              | 2.079        |              |                                                                                           |
| Cys1               | 8.450        | 5.218        | 3.167, 2.616 |                                                                                           |
| Arg2               | 8.748        | 4.632        | 1.810        | H $\gamma$ : 1.655, 1.549; H $\delta$ : 3.180; NHt: 7.135                                 |
| Aad3               | 8.641        | 4.930        | 1.691        | H $\gamma$ : 1.547, 1.434; H $\delta$ : 2.136, 2.057                                      |
| Val4               | 9.014        | 4.499        | 2.025        | H $\gamma$ : 0.870, 0.825                                                                 |
| Thr5               | 8.485        | 4.962        | 3.959        | H $\gamma$ : 1.033                                                                        |
| Val6               | 8.952        | 4.602        | 1.941        | H $\gamma$ : 0.916, 0.891                                                                 |
| $^{\text{D}}$ Pro7 |              | 4.353        | 2.365, 1.962 | H $\gamma$ : 2.151, 2.045; H $\delta$ : 3.877, 3.810                                      |
| Gly8               | 8.439        | 3.992, 3.763 |              |                                                                                           |
| Orn9               | 7.941        | 4.679        | 1.856, 1.815 | H $\gamma$ : 1.689; H $\delta$ : 3.013; NHt: 7.620                                        |
| Agh10              | 8.484        | 4.862        | 1.717        | H $\gamma$ : 1.548, 1.421; H $\delta$ : 1.365, 1.282;<br>H $\epsilon$ : 3.077; NHt: 7.145 |
| Ile11              | 9.152        | 4.504        | 1.830        | H $\gamma$ : 1.336, 1.103, 0.852(Me); H $\delta$ : 0.798                                  |
| Leu12              | 8.406        | 4.720        | 1.641        | H $\gamma$ : 1.484; H $\delta$ : 0.816, 0.778                                             |
| Gln13              | 9.159        | 4.654        | 2.105, 1.898 | H $\gamma$ : 2.278, 2.221; HNt: 7.350, 6.832                                              |
| Cys14              | 9.009        | 5.090        | 3.127, 3.003 |                                                                                           |
| NH $_2$            | 7.602, 7.244 |              |              |                                                                                           |

**Table S39.** The  $^3J_{NH\alpha}$  Values (Hz) of the Residues in the HPDAspAgx Peptides.

| Residue | Agx |     |      |     |
|---------|-----|-----|------|-----|
|         | Agp | Agb | Arg  | Agh |
| Arg1    | 9.8 | 9.8 | 9.9  | 9.9 |
| Asp2    | 9.4 | 9.6 | 9.9  | 9.6 |
| Val3    | 10  | 11  | 11   | 9.8 |
| Thr4    | 10  | 11  | 11   | 11  |
| Val5    | 11  | 11  | 10   | 10  |
| Gly7    | 9.8 | 9.8 | 8.8  | 10  |
| Orn8    | 10  | 11  | 9.6  | 10  |
| Agx9    | 9.9 | 11  | 9.8  | 9.9 |
| Ile10   | 8.6 | 9.2 | 11   | 11  |
| Leu11   | 9.4 | 11  | 10.8 | 9.8 |
| Gln12   | 9.6 | 11  | 9.6  | 9.8 |

**Table S40.** The  $^3J_{NH\alpha}$  Values (Hz) of the Residues in the HPDGluAgx Peptides.

| Residue | Agx |     |     |     |
|---------|-----|-----|-----|-----|
|         | Agp | Agb | Arg | Agh |
| Arg1    | 11  | 11  | 8.6 | 11  |
| Glu2    | 9.6 | 11  | 12  | 9   |
| Val3    | 9.2 | 11  | 10  | 11  |
| Thr4    | 11  | 10  | 11  | 11  |
| Val5    | 11  | 10  | 11  | 10  |
| Gly7    | 11  | 11  | 9.8 | 9.9 |
| Orn8    | 11  | 11  | 11  | 9.2 |
| Agx9    | 10  | 10  | 9.0 | 9.6 |
| Ile10   | 11  | 10  | 9.8 | 9.4 |
| Leu11   | 9.8 | 11  | 9.8 | 9.4 |
| Gln12   | 11  | 11  | 9.2 | 9.8 |

**Table S41.** The  $^3J_{NH\alpha}$  Values (Hz) of the Residues in the HPDAadAgx Peptides.

| Residue | Agx             |     |     |     |
|---------|-----------------|-----|-----|-----|
|         | Agp             | Agb | Arg | Agh |
| Arg1    | 9.6             | 11  | 11  | 9.8 |
| Aad2    | ND <sup>a</sup> | 11  | 9.6 | 9.6 |
| Val3    | 11              | 11  | 7.6 | 9.8 |
| Thr4    | 10              | 11  | 12  | 11  |
| Val5    | 10              | 11  | 11  | 11  |
| Gly7    | 9.6             | 11  | 11  | 10  |
| Orn8    | 10              | 11  | 11  | 11  |
| Agx9    | 9.9             | 10  | 11  | 11  |
| Ile10   | 11              | 10  | 10  | 10  |
| Leu11   | ND <sup>a</sup> | 11  | 9.6 | 10  |
| Gln12   | 11              | 11  | 7.6 | 8.6 |

<sup>a</sup>Not determined due to signal overlap.**Table S42.** The  $^3J_{NH\alpha}$  Values (Hz) of the Residues in the HPDFAspAgx Peptides.

| Residue | Agx |     |     |     |
|---------|-----|-----|-----|-----|
|         | Agp | Agb | Arg | Agh |
| Cys1    | 12  | 11  | 10  | 11  |
| Arg2    | 11  | 11  | 10  | 12  |
| Asp3    | 10  | 11  | 9.8 | 11  |
| Val4    | 11  | 11  | 11  | 13  |
| Thr5    | 11  | 11  | 11  | 13  |
| Val6    | 11  | 11  | 12  | 12  |
| Gly8    | 9.8 | 11  | 9.2 | 11  |
| Orn9    | 11  | 11  | 11  | 13  |
| Agx10   | 11  | 11  | 12  | 11  |
| Ile11   | 11  | 11  | 10  | 13  |
| Leu12   | 11  | 11  | 11  | 11  |
| Gln13   | 11  | 11  | 11  | 11  |
| Cys14   | 12  | 12  | 10  | 12  |

**Table S43.** The  $^3J_{NH\alpha}$  Values (Hz) of the Residues in the HPDFGluAgx Peptides.

| Residue | Agx             |     |     |     |
|---------|-----------------|-----|-----|-----|
|         | Agp             | Agb | Arg | Agh |
| Cys1    | 11              | 11  | 11  | 11  |
| Arg2    | ND <sup>a</sup> | 11  | 13  | 11  |
| Glu3    | 11              | 12  | 9.9 | 11  |
| Val4    | 11              | 11  | 12  | 12  |
| Thr5    | 11              | 11  | 11  | 11  |
| Val6    | ND <sup>a</sup> | 12  | 14  | 11  |
| Gly8    | 9.8             | 11  | 8.1 | 10  |
| Orn9    | 11              | 11  | 13  | 12  |
| Agx10   | 11              | 12  | 9.9 | 12  |
| Ile11   | 11              | 11  | 12  | 11  |
| Leu12   | 12              | 11  | 11  | 11  |
| Gln13   | 11              | 11  | 14  | 11  |
| Cys14   | 11              | 11  | 13  | 12  |

<sup>a</sup>Not determined due to signal overlap.**Table S44.** The  $^3J_{NH\alpha}$  Values (Hz) of the Residues in the HPDFAadAgx Peptides.

| Residue | Agx             |                 |     |     |
|---------|-----------------|-----------------|-----|-----|
|         | Agp             | Agb             | Arg | Agh |
| Cys1    | 11              | 12              | 10  | 11  |
| Arg2    | ND <sup>a</sup> | 11              | 11  | 12  |
| Aad3    | 10              | 11              | 12  | 12  |
| Val4    | 11              | 11              | 10  | 11  |
| Thr5    | 10              | ND <sup>a</sup> | 12  | 10  |
| Val6    | ND <sup>a</sup> | 11              | 11  | 11  |
| Gly8    | 8.6             | 9.8             | 8.6 | 8.8 |
| Orn9    | 10              | 11              | 12  | 11  |
| Agx10   | 11              | ND <sup>a</sup> | 11  | 11  |
| Ile11   | 11              | 11              | 11  | 11  |
| Leu12   | 11              | 11              | 10  | 11  |
| Gln13   | 11              | 11              | 10  | 11  |
| Cys14   | 11              | 11              | 11  | 12  |

<sup>a</sup>ND: Not determined due to signal overlap.



**Table S45.** The  $^3J_{NH\alpha}$  Values (Hz) of the Residues in HPDUAspAgx Peptides.

| Residue | Agx |     |     |     |
|---------|-----|-----|-----|-----|
|         | Agp | Agb | Arg | Agh |
| Arg1    | 9.8 | 9.9 | 9.9 | 8.8 |
| Asp2    | 9.4 | 9.6 | 10  | 9.6 |
| Val3    | 9.6 | 8.1 | 10  | 9.4 |
| Thr4    | 9.6 | 11  | 10  | 9.2 |
| Val5    | 10  | 10  | 10  | 10  |
| Gly7    | 13  | 13  | 14  | 11  |
| Orn8    | 9.4 | 9.4 | 11  | 9.8 |
| Agx9    | 9.9 | 8.9 | 9.8 | 7.2 |
| Ile10   | 9.6 | 8.9 | 11  | 11  |
| Leu11   | 8.9 | 9.6 | 9.4 | 10  |
| Gln12   | 9.2 | 9.6 | 9.8 | 7.3 |

**Table S46.** The  $^3J_{NH\alpha}$  Values (Hz) of the Residues in HPDUGluAgx Peptides.

| Residue | Agx             |     |     |     |
|---------|-----------------|-----|-----|-----|
|         | Agp             | Agb | Arg | Agh |
| Arg1    | 9.8             | 9.8 | 9.9 | 8.4 |
| Glu2    | 9.6             | 9.6 | 10  | 9.6 |
| Val3    | 9.8             | 8.9 | 11  | 8.9 |
| Thr4    | 9.8             | 9.4 | 9.6 | 9.2 |
| Val5    | 11              | 10  | 9.8 | 11  |
| Gly7    | 13              | 13  | 12  | 12  |
| Orn8    | ND <sup>a</sup> | 9.6 | 9.9 | 8.9 |
| Agx9    | 10              | 9.4 | 9.8 | 8.9 |
| Ile10   | 9.0             | 9.6 | 11  | 8.2 |
| Leu11   | 9.6             | 9.2 | 11  | 8.5 |
| Gln12   | 9.2             | 9.8 | 8.8 | 8.9 |

<sup>a</sup>Not determined due to signal overlap.

**Table S47.** The  $^3J_{NH\alpha}$  Values (Hz) of the Residues in HPDUAadAgx Peptides.

| Residue | Agx             |     |     |     |
|---------|-----------------|-----|-----|-----|
|         | Agp             | Agb | Arg | Agh |
| Arg1    | 10              | 9.4 | 9.9 | 9.2 |
| Aad2    | ND <sup>a</sup> | 6.5 | 9.3 | 9.6 |
| Val3    | 9.6             | 8.1 | 8.8 | 8.1 |
| Thr4    | 10              | 8.1 | 8.6 | 8.9 |
| Val5    | 9.6             | 10  | 10  | 11  |
| Gly7    | 14              | 14  | 12  | 12  |
| Orn8    | 9.4             | 8.6 | 10  | 9.4 |
| Agx9    | 9.6             | 10  | 5.7 | 7.3 |
| Ile10   | 10              | 9.8 | 11  | 9.4 |
| Leu11   | 8.9             | 7.7 | 8.8 | 9.2 |
| Gln12   | 8.1             | 11  | 9.9 | 9.4 |

<sup>a</sup>Not determined due to signal overlap.

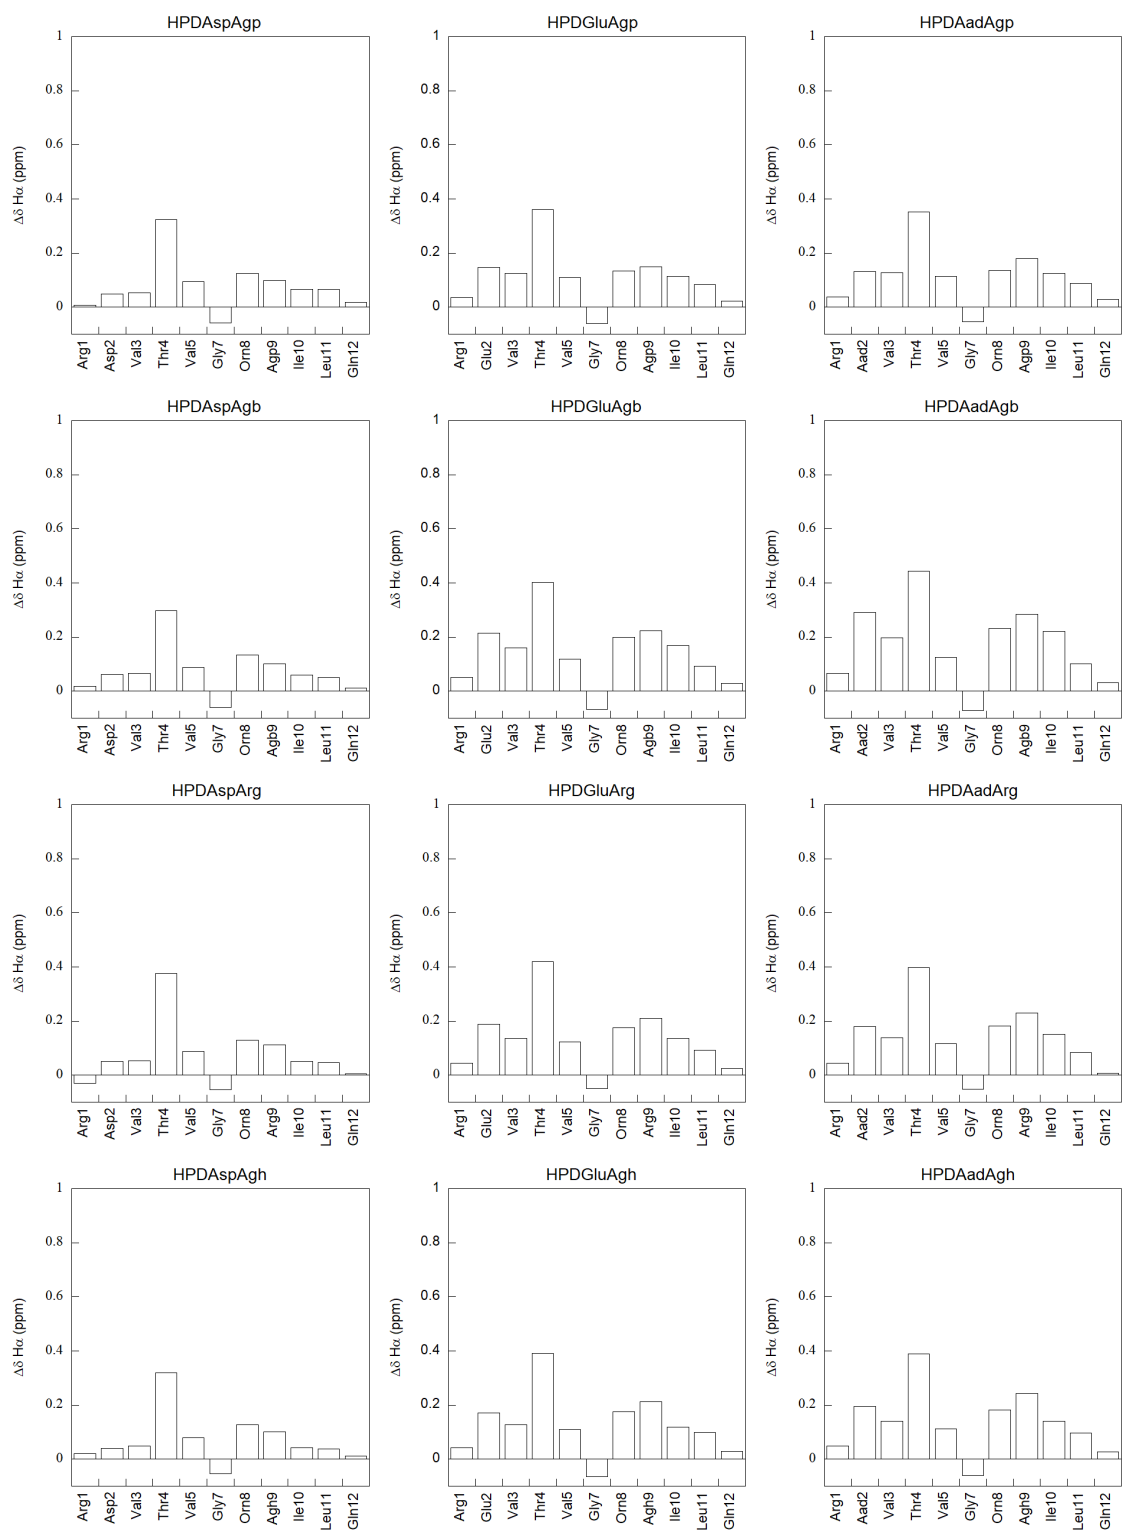

**Figure S1.** The  $H_\alpha$  chemical shift deviation for the residues in the experimental HPDZbbAgx peptides.

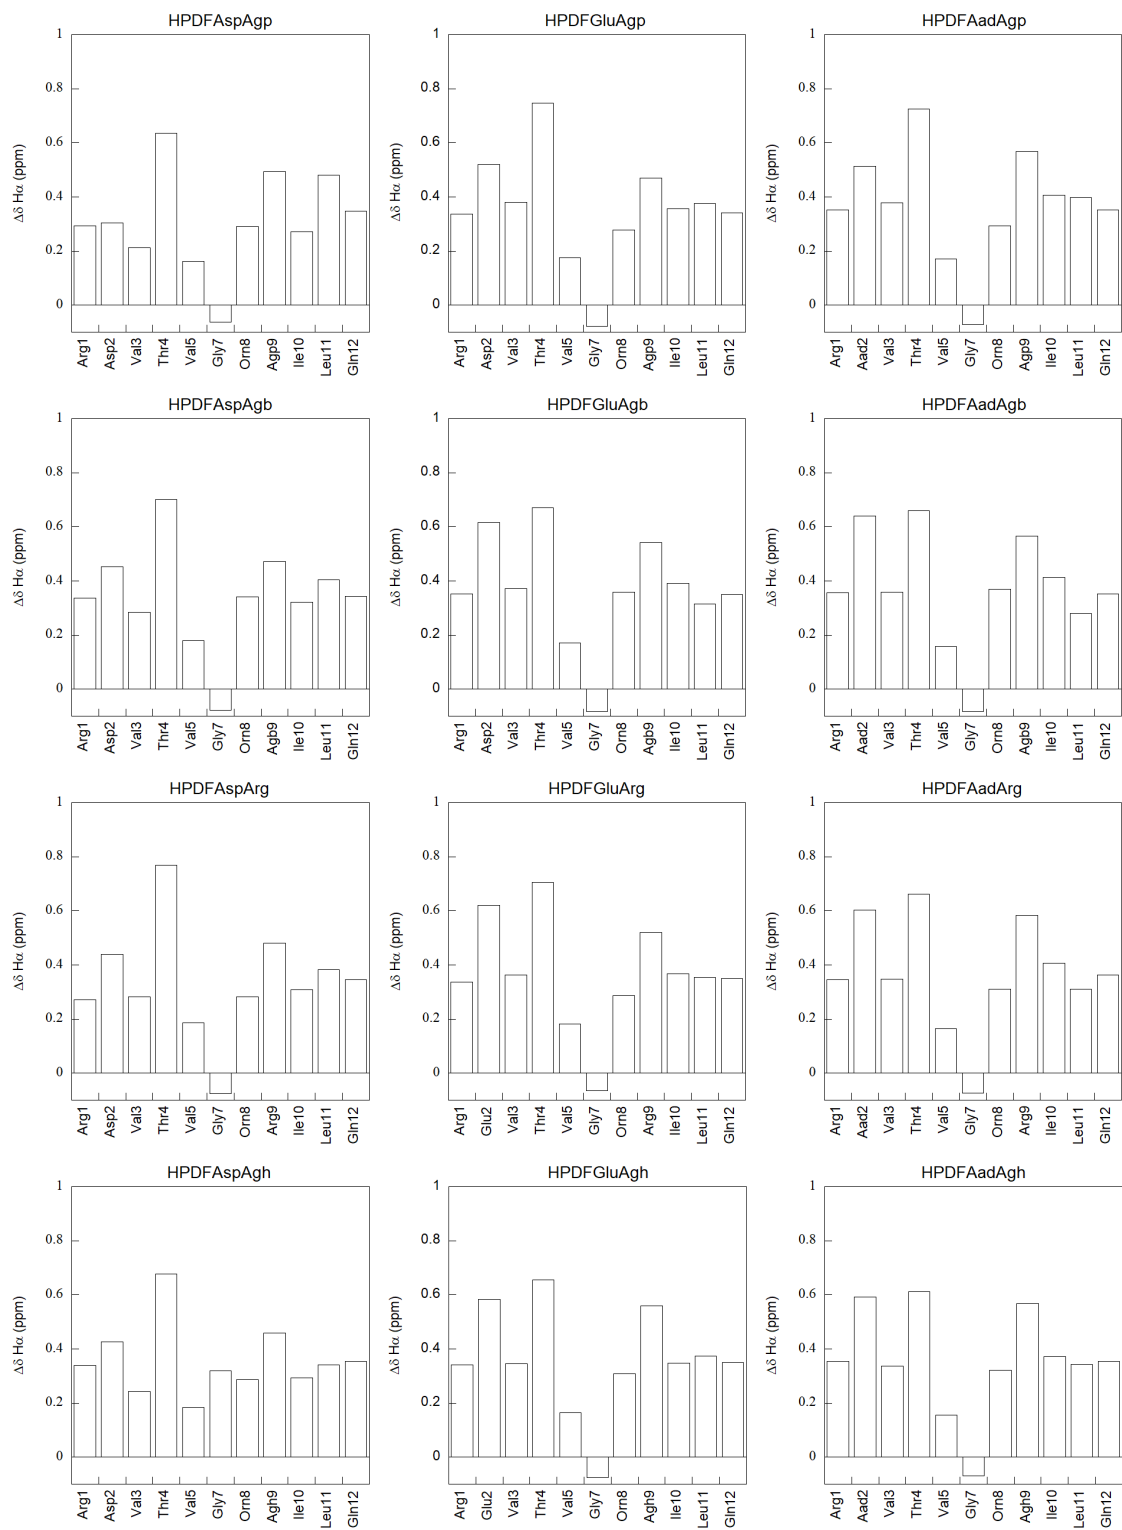

**Figure S2.** The  $H_\alpha$  chemical shift deviation for the residues in the fully folded reference HPDFZbbAgx peptides.

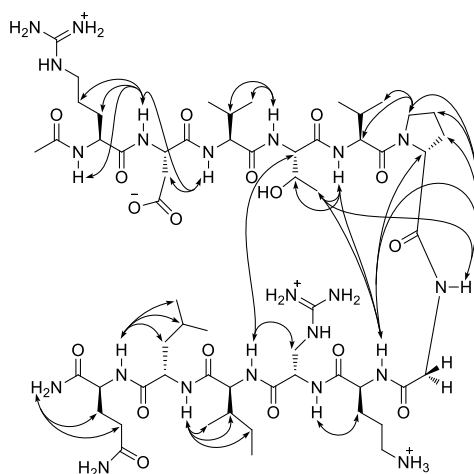

**Figure S3.** The inter-residue NOEs involving side chain protons for the peptide HPDAspAgp.

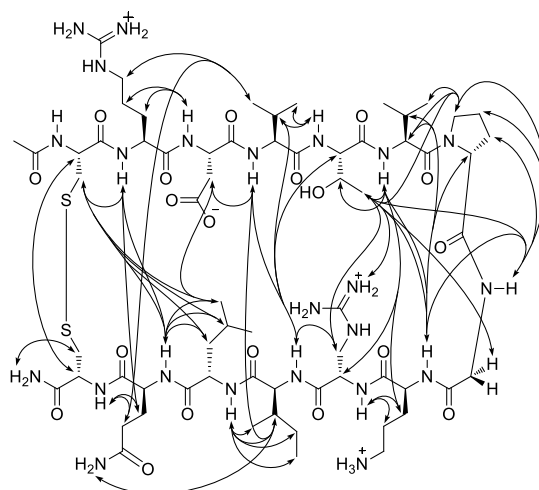

**Figure S4.** The inter-residue NOEs involving side chain protons for the peptide HPDFAspAgp.

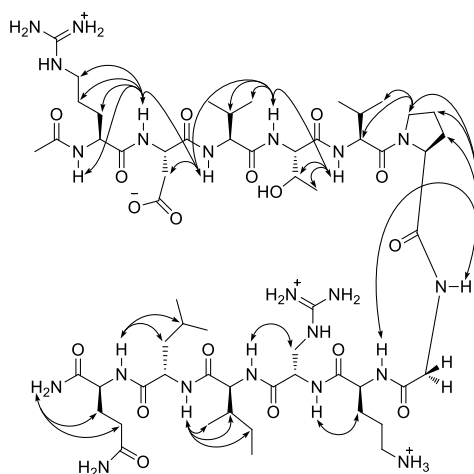

**Figure S5.** The inter-residue NOEs involving side chain protons for the peptide HPDUAspAgp.

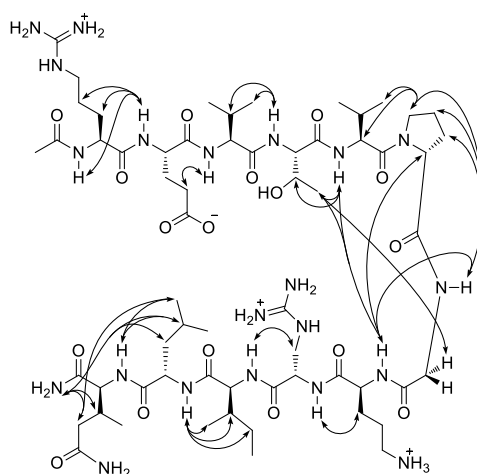

**Figure S6.** The inter-residue NOEs involving side chain protons for the peptide HPDGLuAgi.

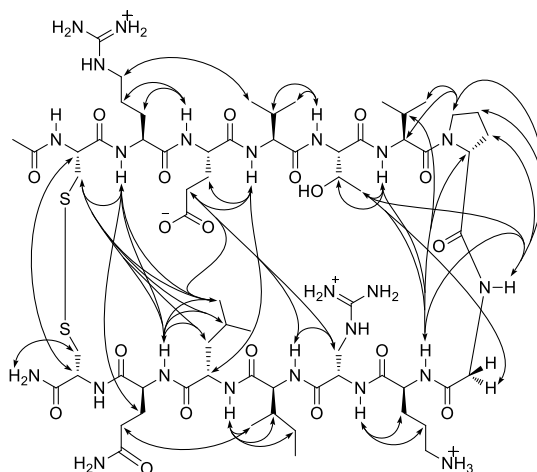

**Figure S7.** The inter-residue NOEs involving side chain protons for the peptide HPDFGLuAgi.

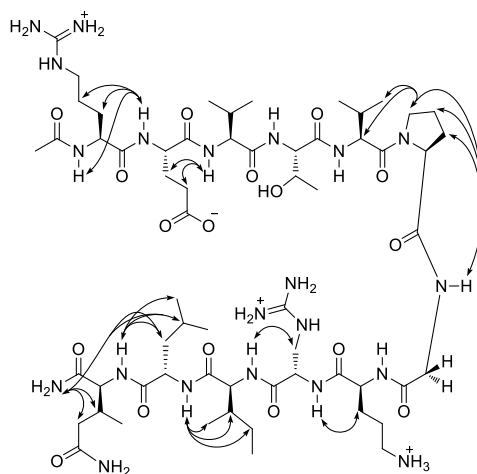

**Figure S8.** The inter-residue NOEs involving side chain protons for the peptide HPDUGluAgi.

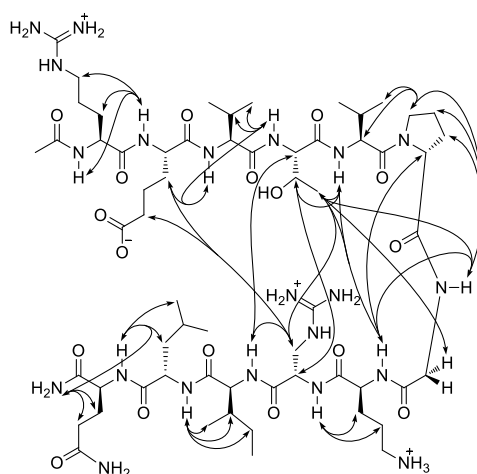

**Figure S9.** The inter-residue NOEs involving side chain protons for the peptide HPDAadAgp.

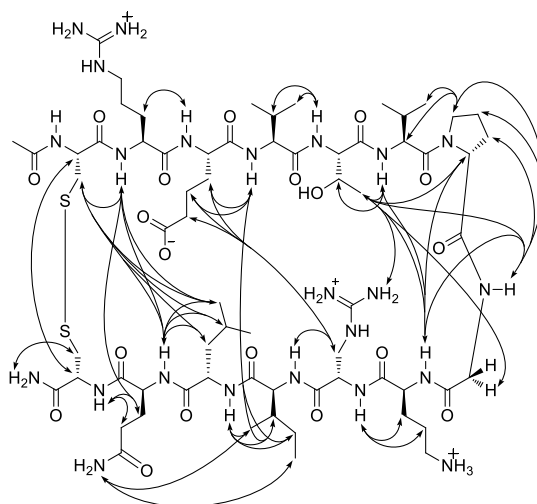

**Figure S10.** The inter-residue NOEs involving side chain protons for the peptide HPDFAadAgp.

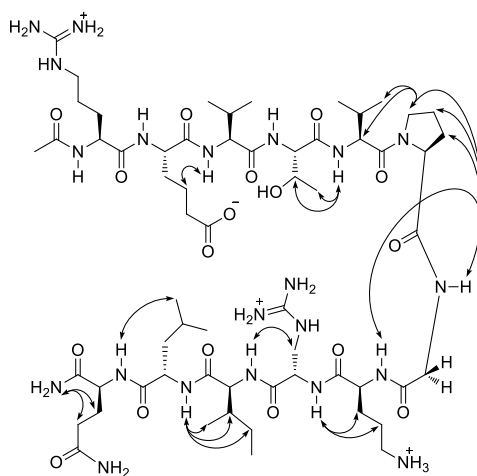

**Figure S11.** The inter-residue NOEs involving side chain protons for the peptide HPDUAadAgp.

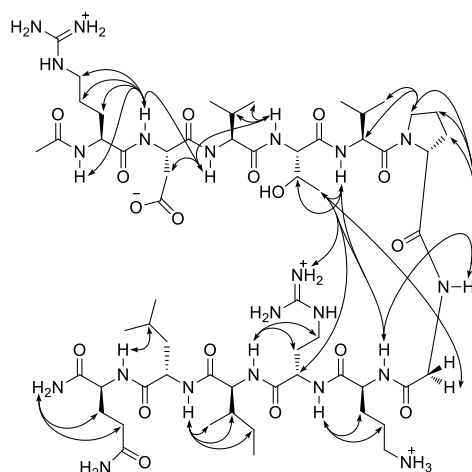

**Figure S12.** The inter-residue NOEs involving side chain protons for the peptide HPDAspAgb.

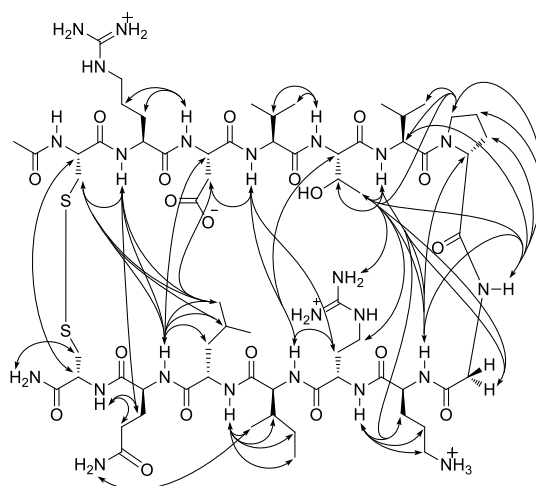

**Figure S13.** The inter-residue NOEs involving side chain protons for the peptide HPDFAspAgb.

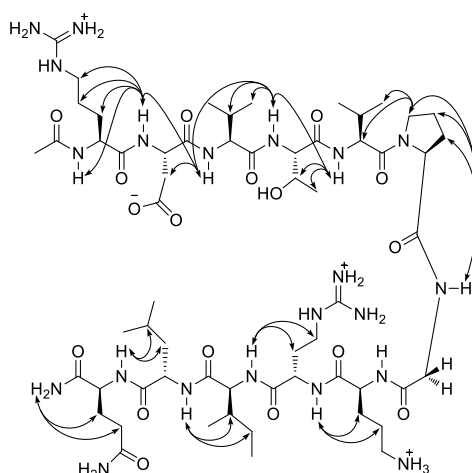

**Figure S14.** The inter-residue NOEs involving side chain protons for the peptide HPDUAspAgb.



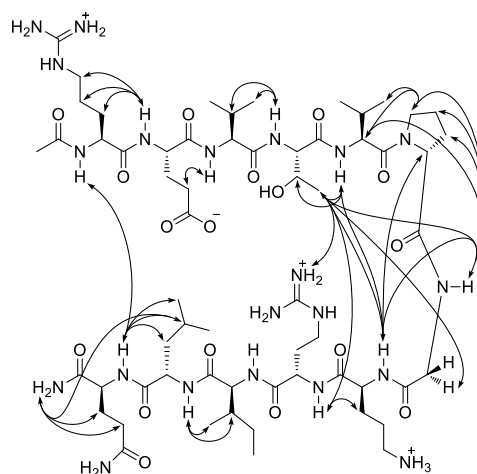

**Figure S15.** The inter-residue NOEs involving side chain protons for the peptide HPDGLuAgb.

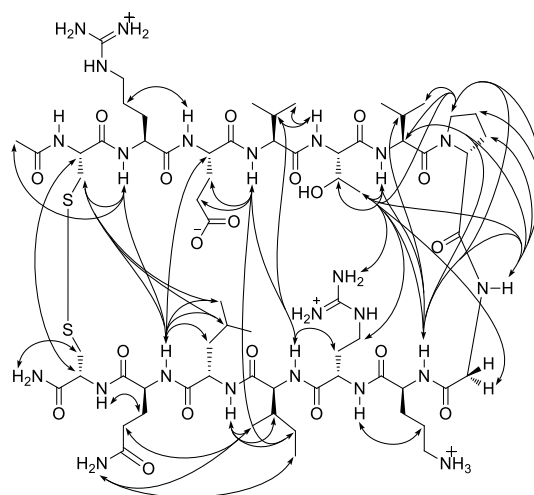

**Figure S16.** The inter-residue NOEs involving side chain protons for the peptide HPDFGLuAgb.

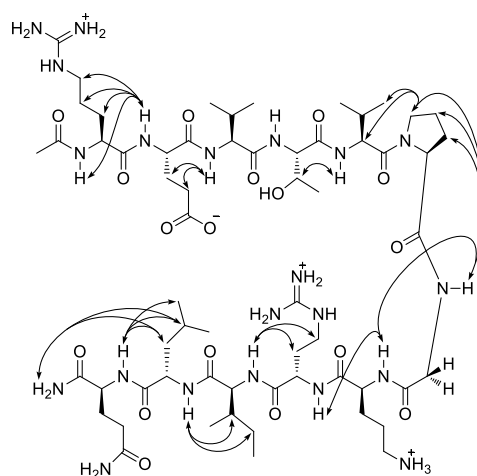

**Figure S17.** The inter-residue NOEs involving side chain protons for the peptide HPDUGluAgb.

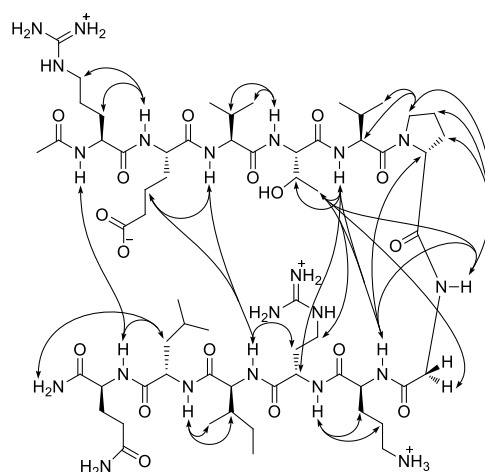

**Figure S18.** The inter-residue NOEs involving side chain protons for the peptide HPDAadAgb.

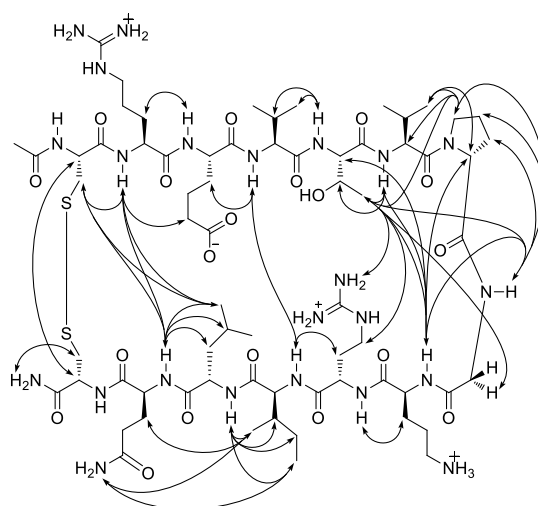

**Figure S19.** The inter-residue NOEs involving side chain protons for the peptide HPDFAadAgb.

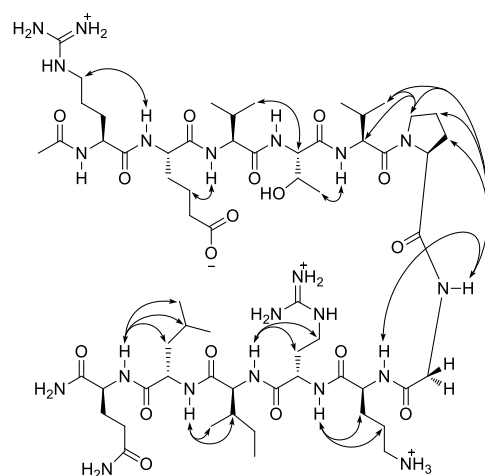

**Figure S20.** The inter-residue NOEs involving side chain protons for the peptide HPDUAadAgb.

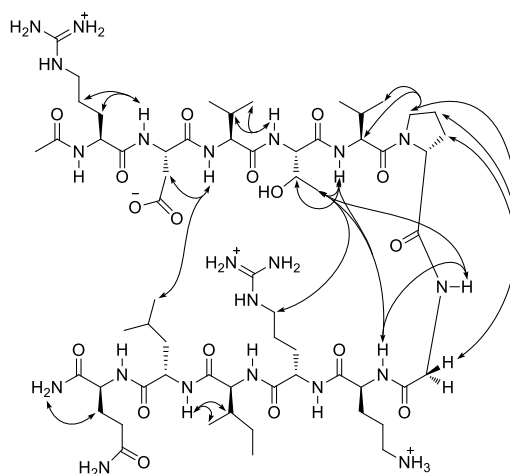

**Figure S21.** The inter-residue NOEs involving side chain protons for the peptide HPDAspArg.

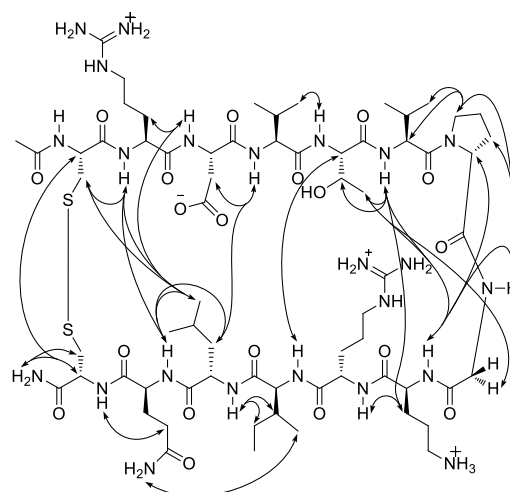

**Figure S22.** The inter-residue NOEs involving side chain protons for the peptide HPDFAspArg.

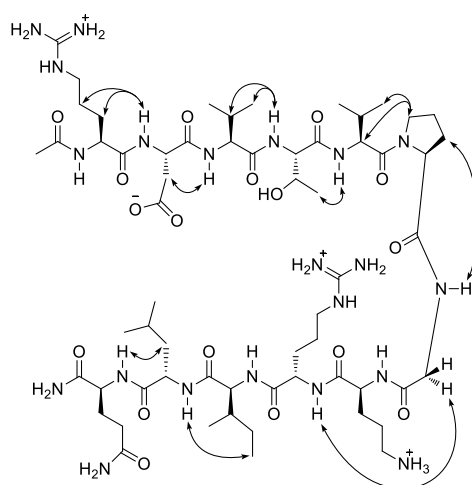

**Figure S23.** The inter-residue NOEs involving side chain protons for the peptide HPDUAspArg.

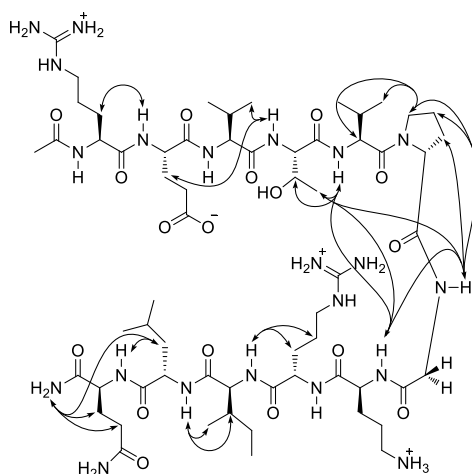

**Figure S24.** The inter-residue NOEs involving side chain protons for the peptide HPDGLuArg.

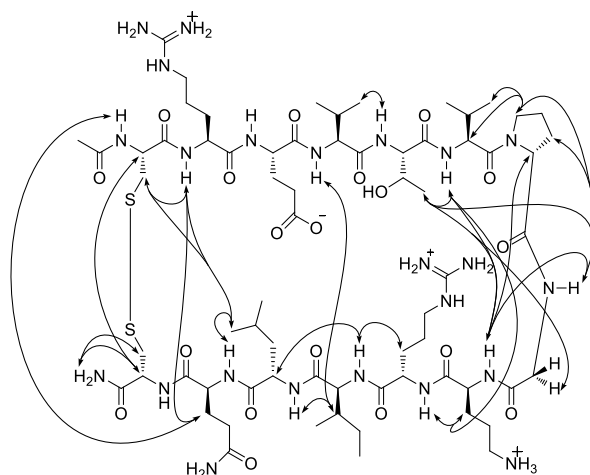

**Figure S25.** The inter-residue NOEs involving side chain protons for the peptide HPDFGLuArg.

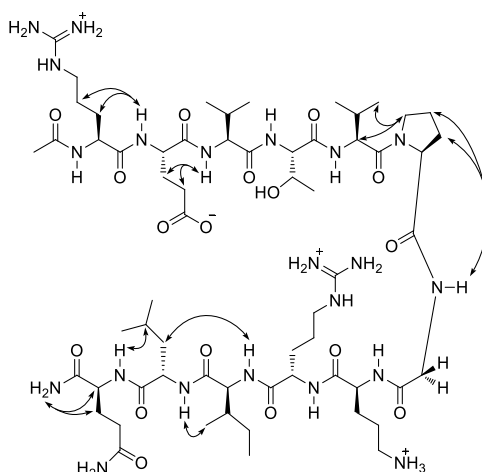

**Figure S26.** The inter-residue NOEs involving side chain protons for the peptide HPDUGluArg.

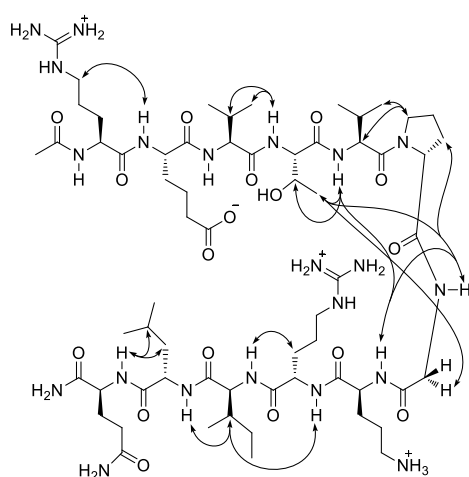

**Figure S27.** The inter-residue NOEs involving side chain protons for the peptide HPDAadArg.

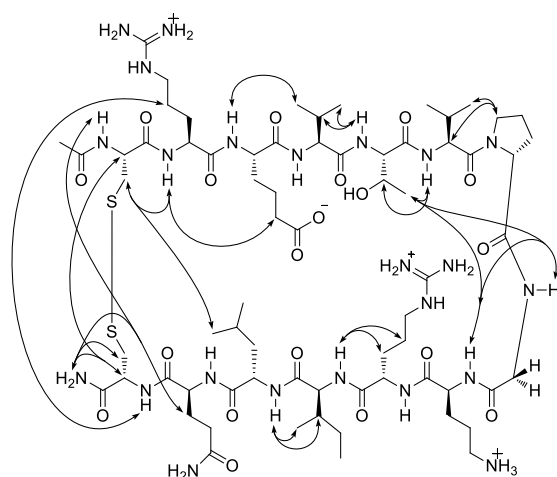

**Figure S28.** The inter-residue NOEs involving side chain protons for the peptide HPDFAadArg.

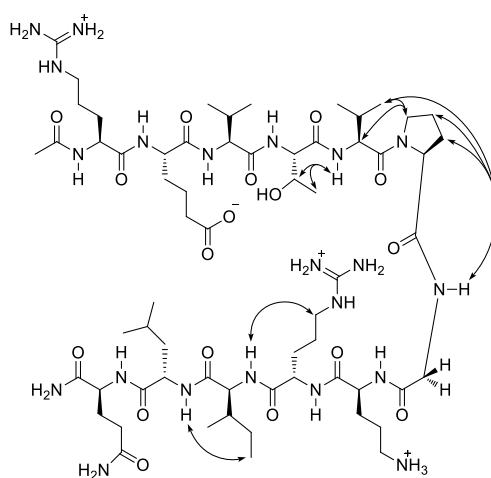

**Figure S29.** The inter-residue NOEs involving side chain protons for the peptide HPDUAadArg.

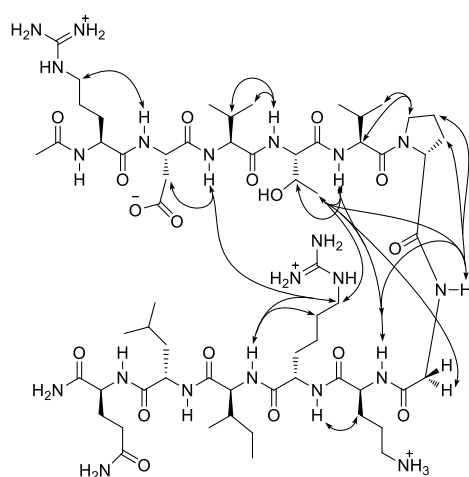

**Figure S30.** The inter-residue NOEs involving side chain protons for the peptide HPDAspAgh.

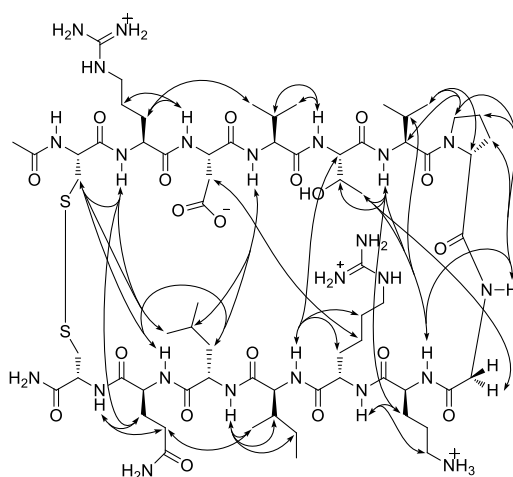

**Figure S31.** The inter-residue NOEs involving side chain protons for the peptide HPDFAspAgh.

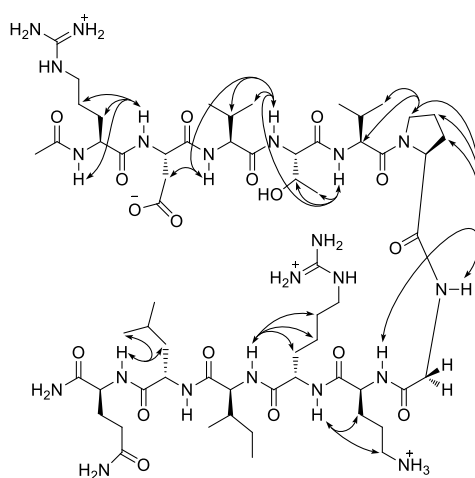

**Figure S32.** The inter-residue NOEs involving side chain protons for the peptide HPDUAspAgh.

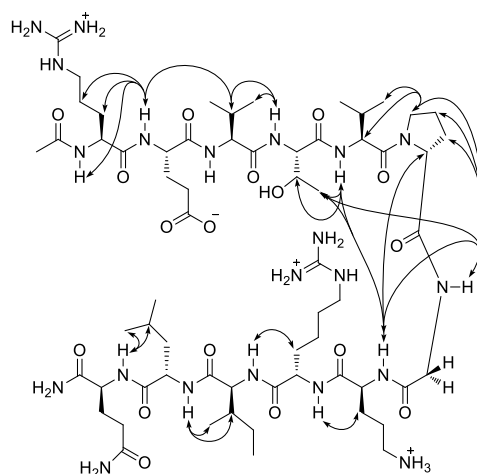

**Figure S33.** The inter-residue NOEs involving side chain protons for the peptide HPDGLuAgh.

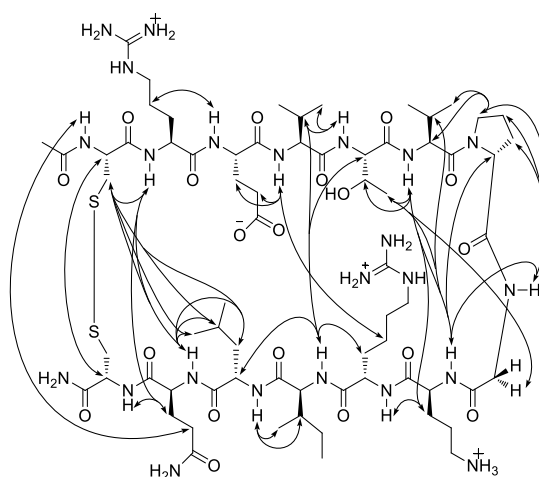

**Figure S34.** The inter-residue NOEs involving side chain protons for the peptide HPDFGLuAgh.

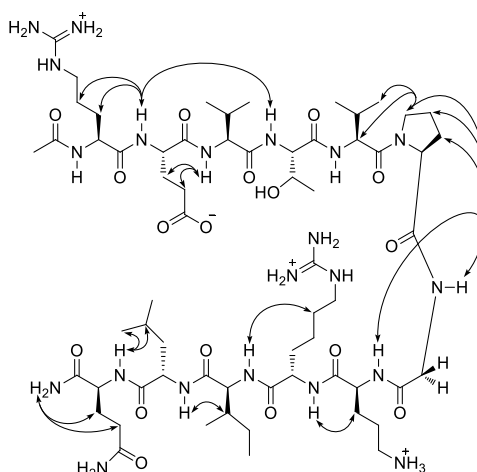

**Figure S35.** The inter-residue NOEs involving side chain protons for the peptide HPDUGluAgh.

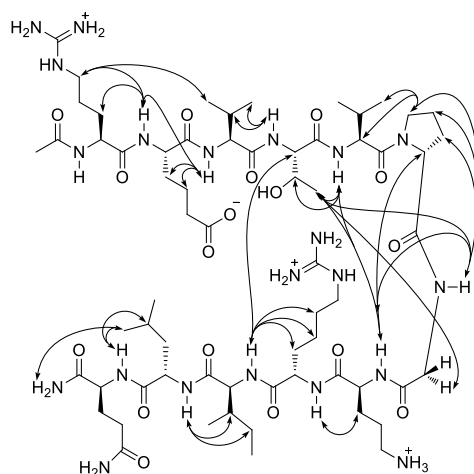

**Figure S36.** The inter-residue NOEs involving side chain protons for the peptide HPDAadAgh.

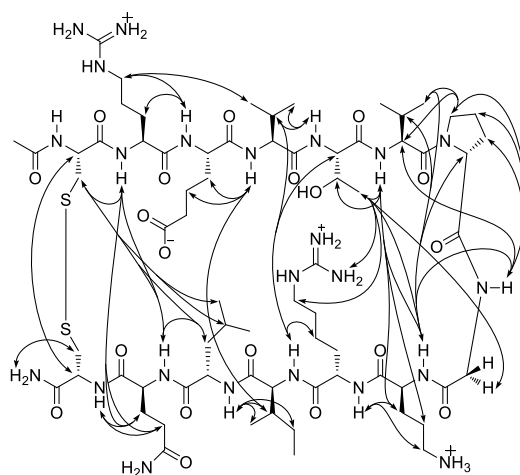

**Figure S37.** The inter-residue NOEs involving side chain protons for the peptide HPDFAadAgh.

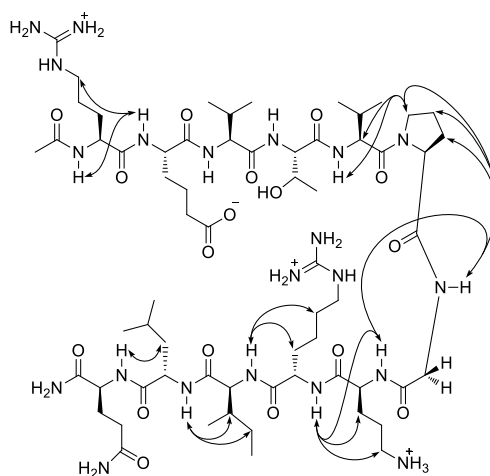

**Figure S38.** The inter-residue NOEs involving side chain protons for the peptide HPDUAadAgh.



# HPDAspAgp

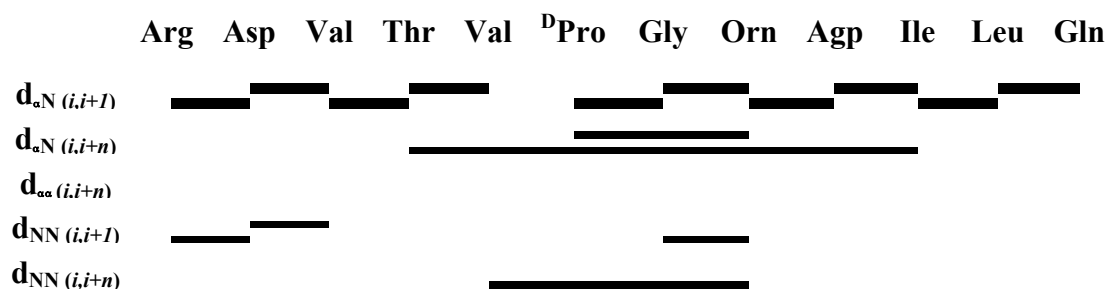

# HPDFAspAgp

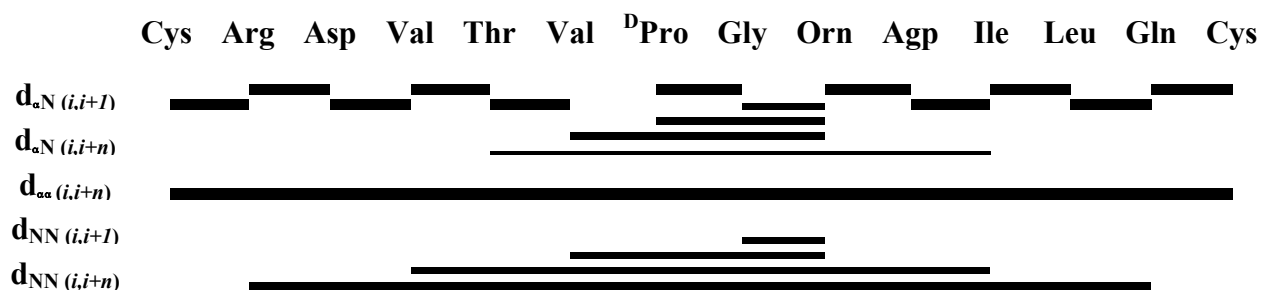

# HPDUAspAgp

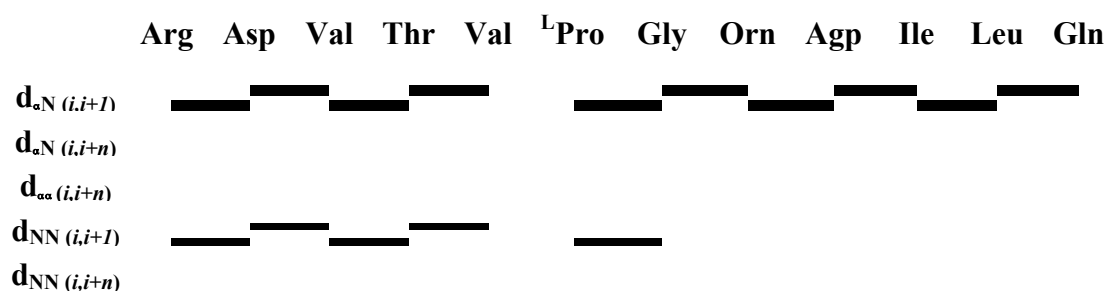

**Figure S39.** Wüthrich diagram of peptides HPDAspAgp, HPDFAspAgp, HPDUAspAgp. Only the backbone NOE connectivities are shown.

# HPDGluAgp

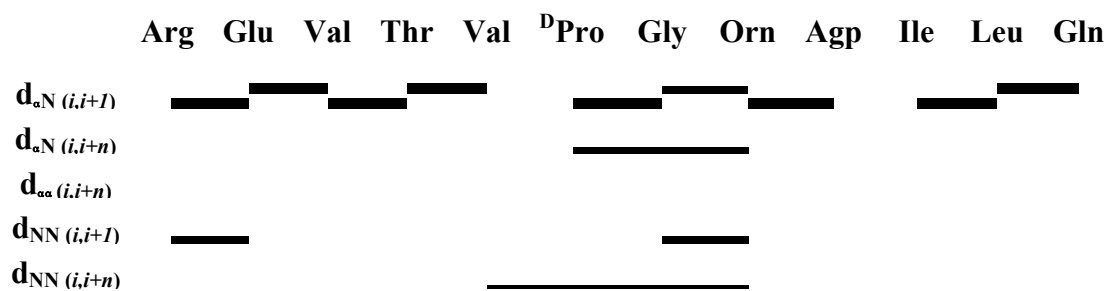

# HPDFGluAgp

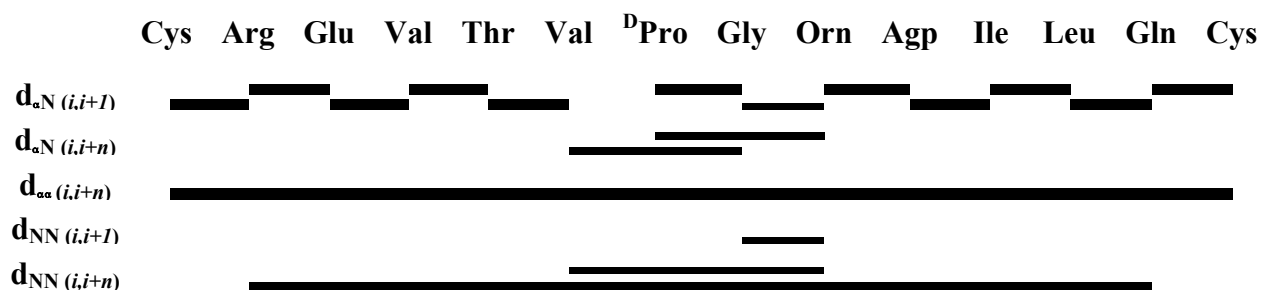

# HPDUGluAgp

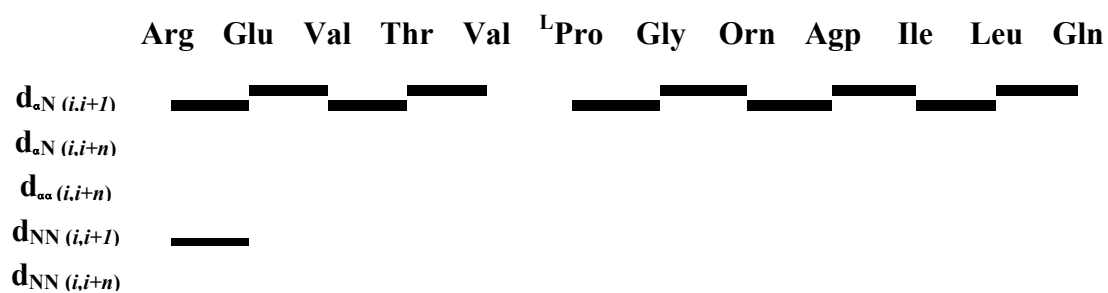

**Figure S40.** Wüthrich diagram of peptides HPDGluAgp, HPDFGluAgp, HPDUGluAgp. Only the backbone NOE connectivities are shown.

# HPDAadAgp

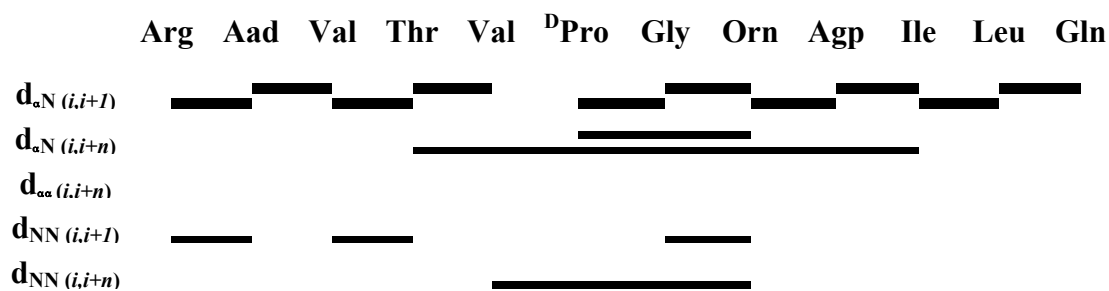

# HPDFAadAgp

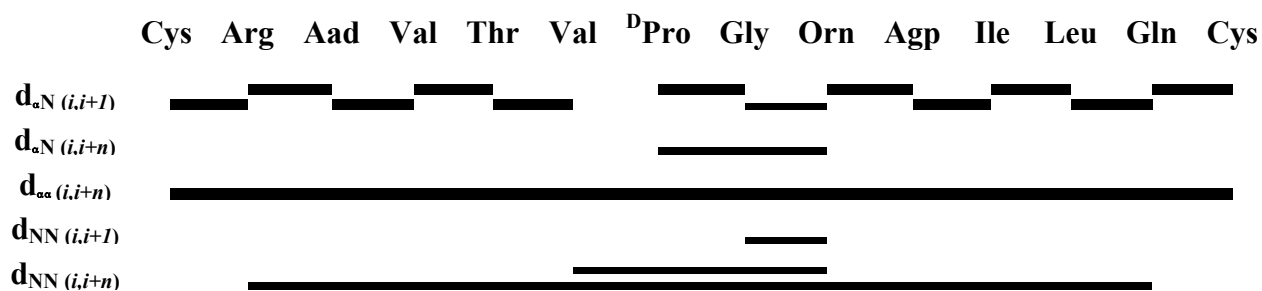

# HPDUAadAgp

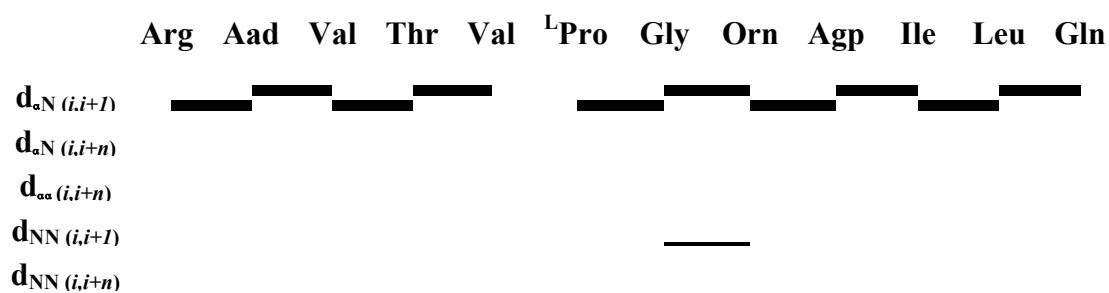

**Figure S41.** Wüthrich diagram of peptides HPDAadAgp, HPDFAadAgp, HPDUAadAgp. Only the backbone NOE connectivities are shown.

# HPDAspAgb

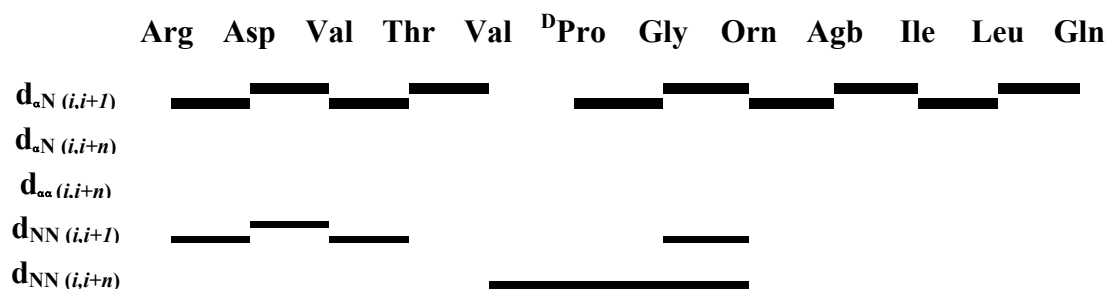

# HPDFAspAgb

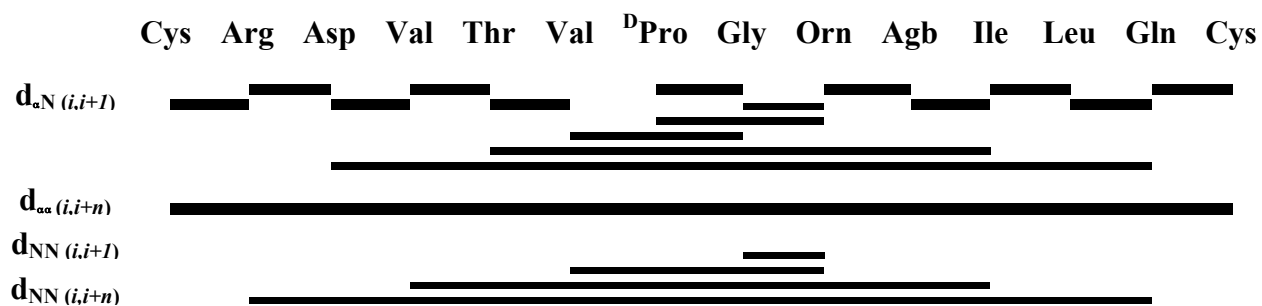

# HPDUAspAgb

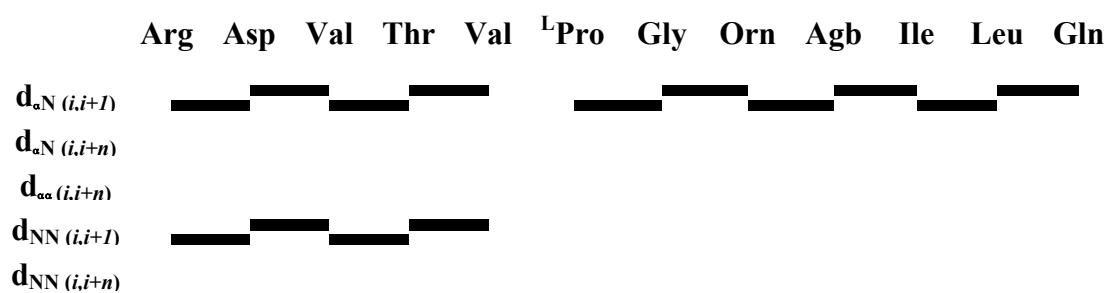

**Figure S42.** Wüthrich diagram of peptides HPDAspAgb, HPDFAspAgb, HPDUAspAgb. Only the backbone NOE connectivities are shown.

# HPDGluAgb

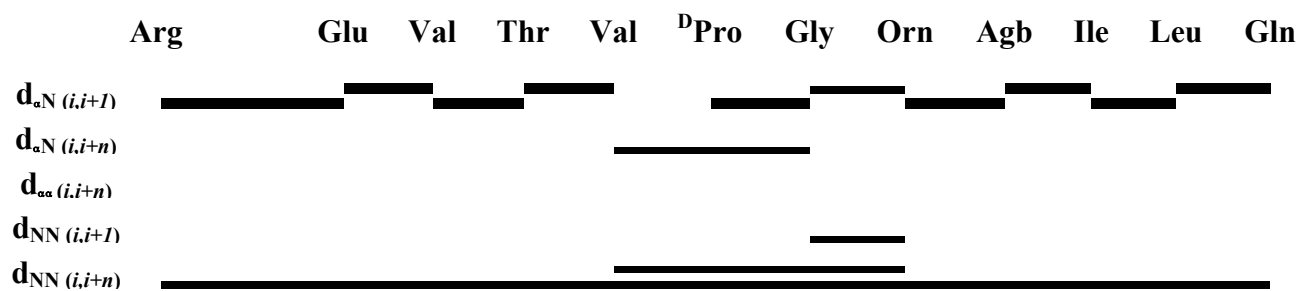

# HPDFGluAgb

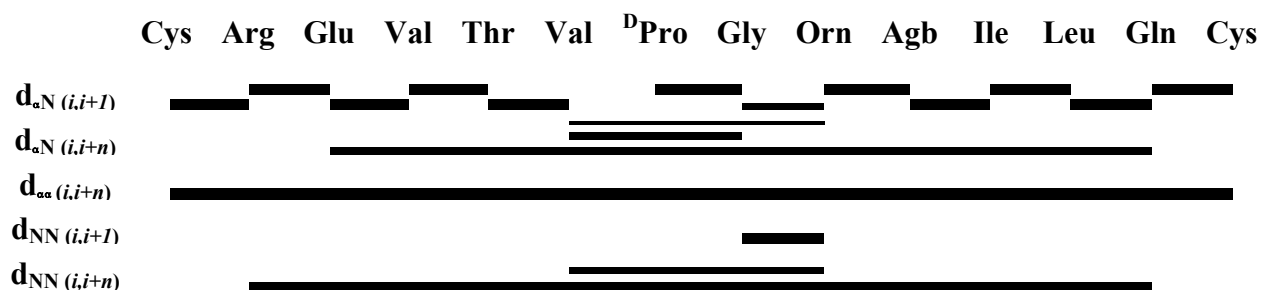

# HPDUGluAgb

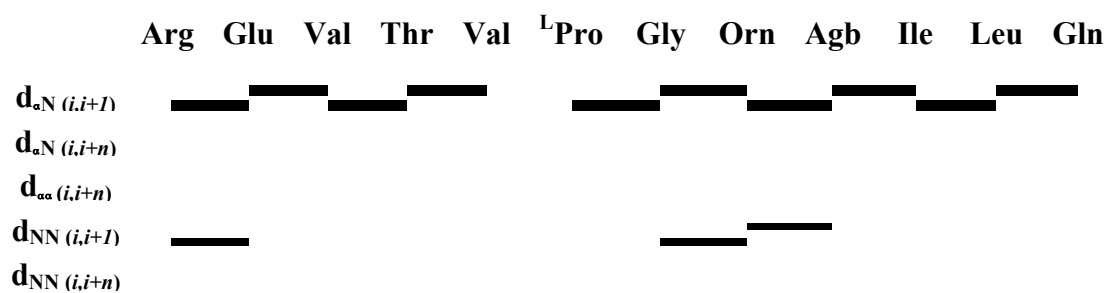

**Figure S43.** Wüthrich diagram of peptides HPDGluAgb, HPDFGluAgb, HPDUGluAgb. Only the backbone NOE connectivities are shown.

# HPDAadAgb

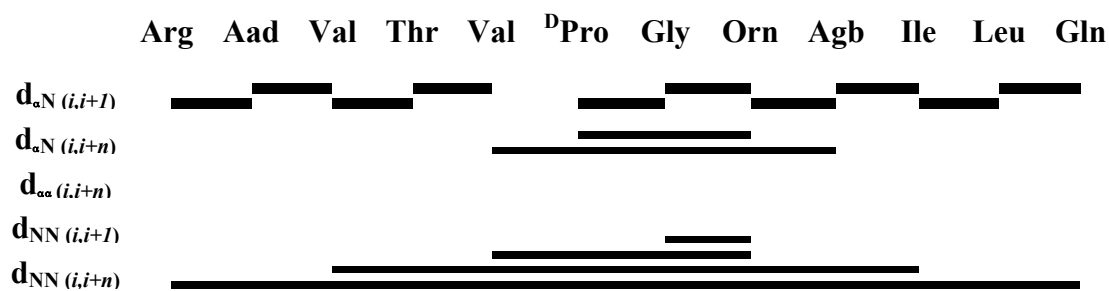

# HPDFAadAgb

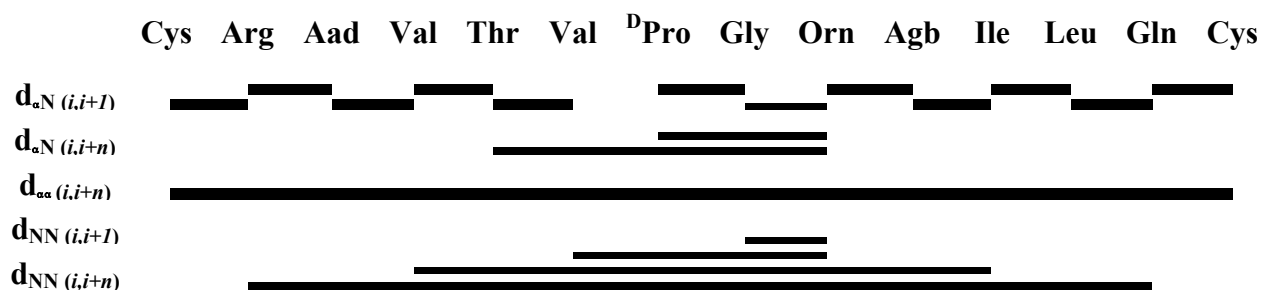

# HPDUAadAgb

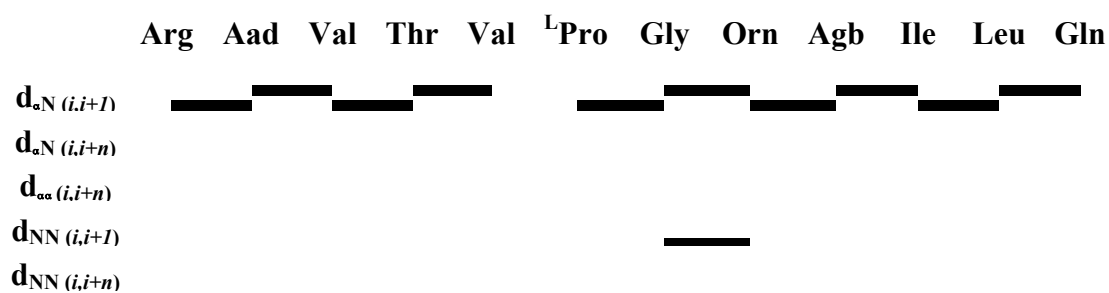

**Figure S44.** Wüthrich diagram of peptides HPDAadAgb, HPDFAadAgb, HPDUAadAgb. Only the backbone NOE connectivities are shown.

# HPDAspArg

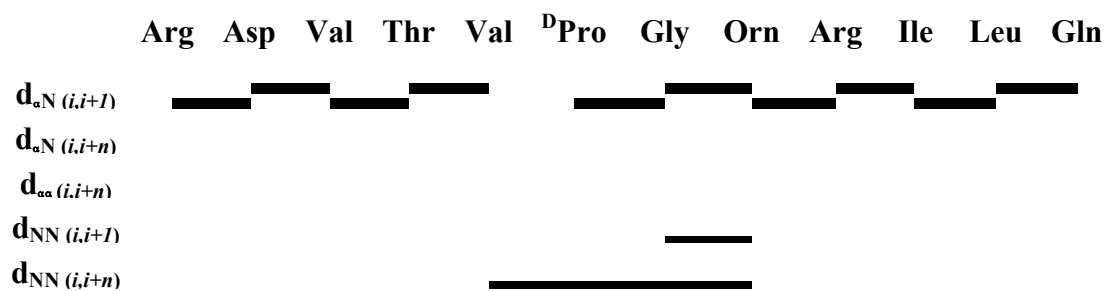

# HPDFAspArg

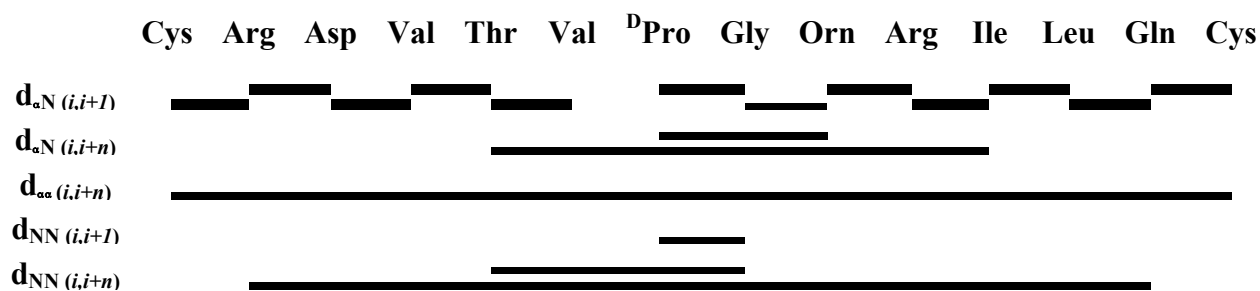

# HPDUAspArg

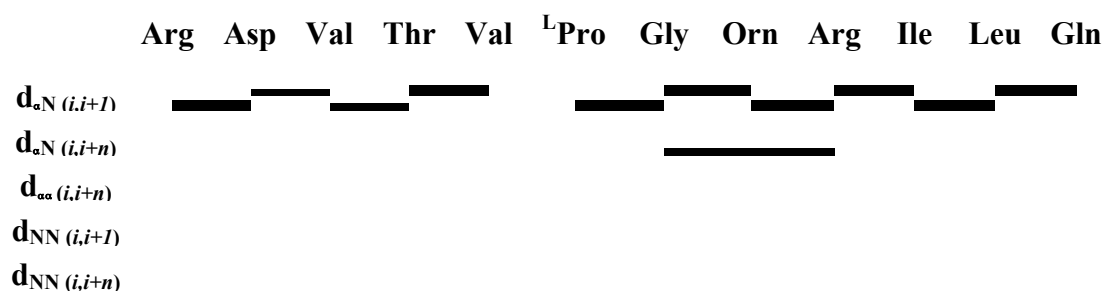

**Figure S45.** Wüthrich diagram of peptides HPDAspArg, HPDFAspArg, HPDUAspArg. Only the backbone NOE connectivities are shown.

# HPDGluArg

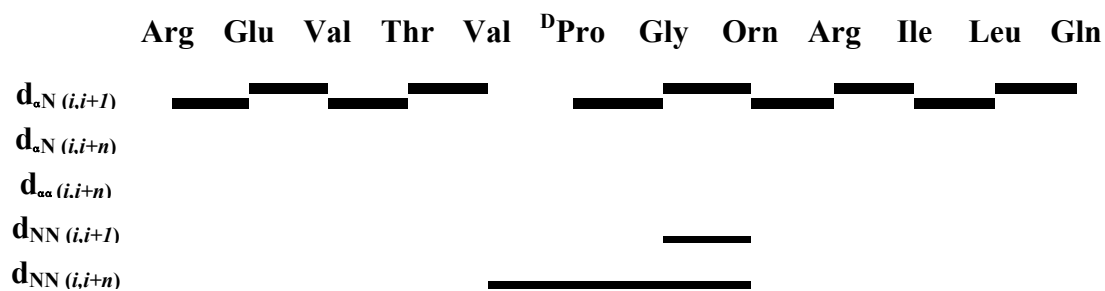

# HPDFGluArg

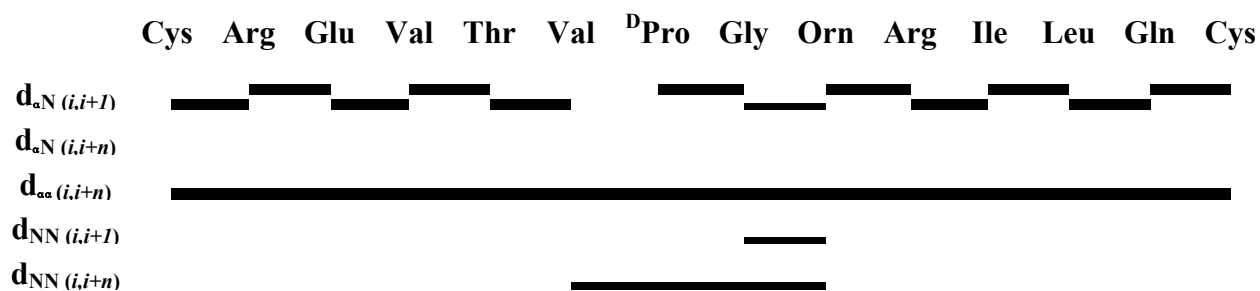

# HPDUGluArg

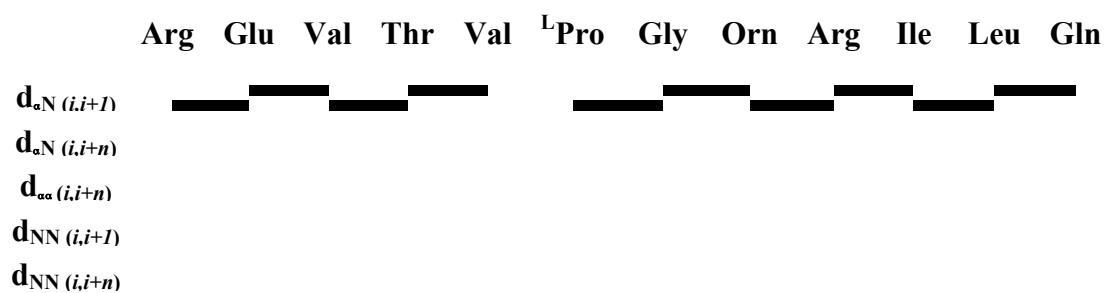

**Figure S46.** Wüthrich diagram of peptides HPDGluArg, HPDFGluArg, HPDUGluArg. Only the backbone NOE connectivities are shown.



# HPDAadArg

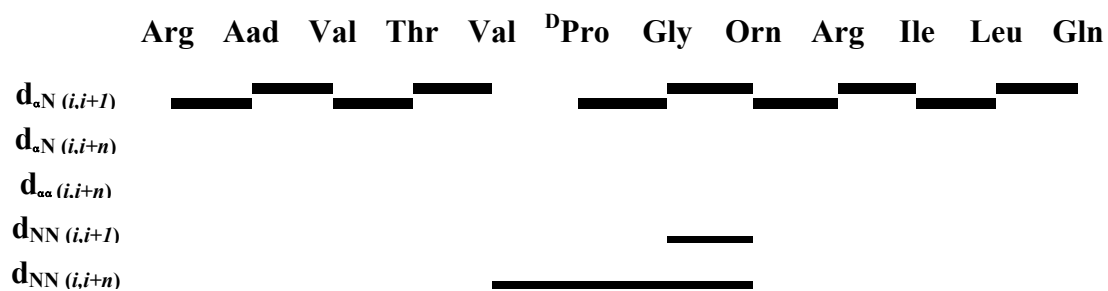

# HPDFAadArg

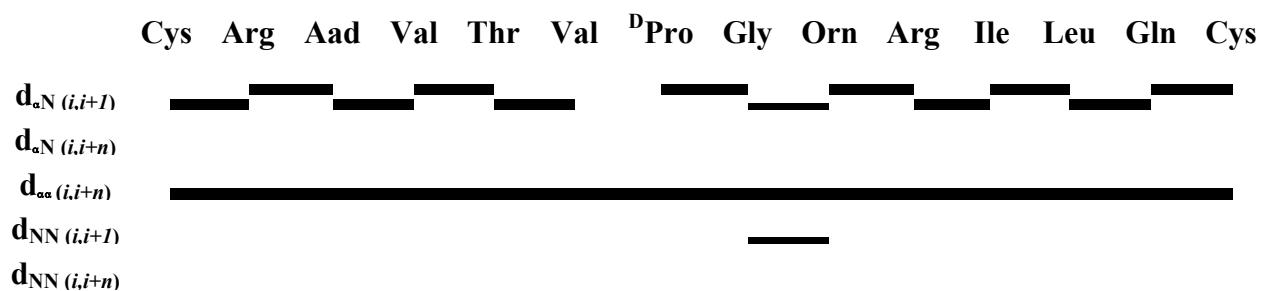

# HPDUAadArg

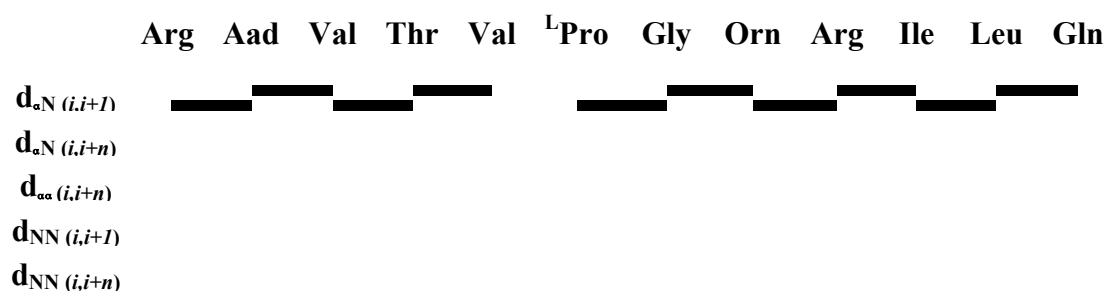

**Figure S47.** Wüthrich diagram of peptides HPDAadArg, HPDFAadArg, HPDUAadArg. Only the backbone NOE connectivities are shown.

# HPDAspAgh

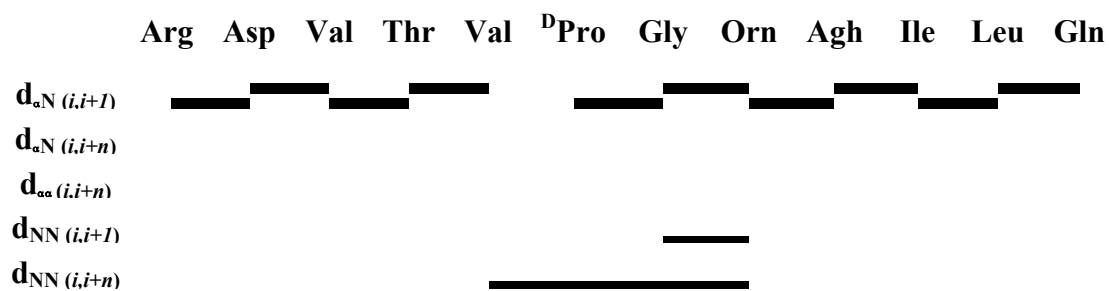

# HPDFAspAgh

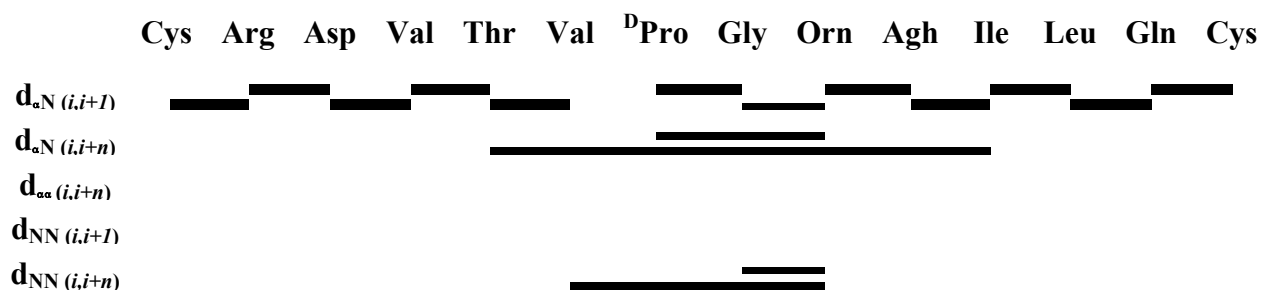

# HPDUAspAgh

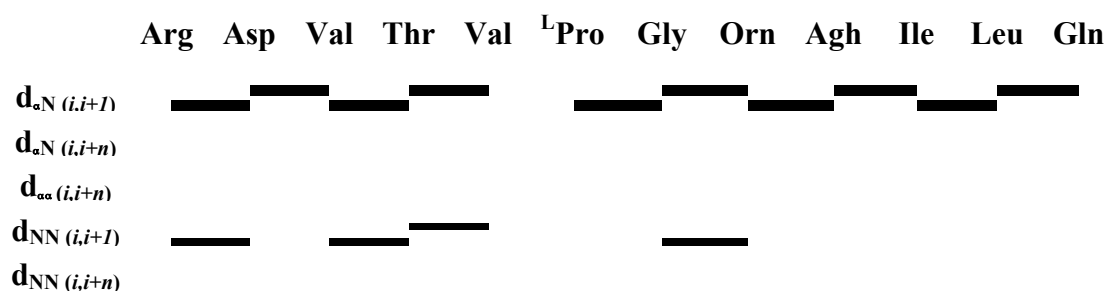

**Figure S48.** Wüthrich diagram of peptides HPDAspAgh, HPDFAspAgh, HPDUAspAgh. Only the backbone NOE connectivities are shown.

HPDGluAgh

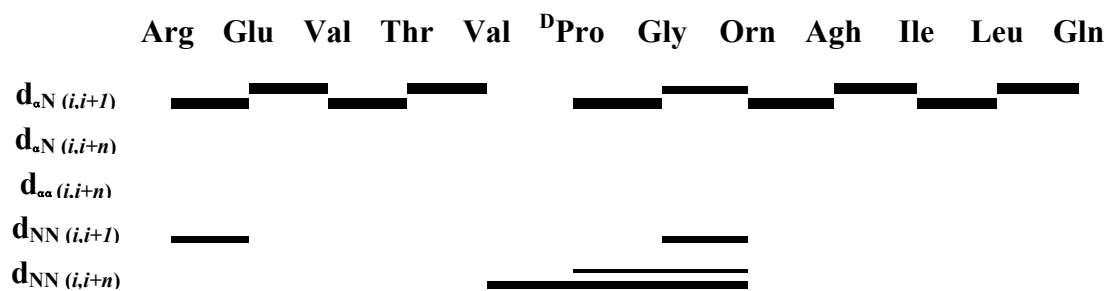

HPDFGluAgh

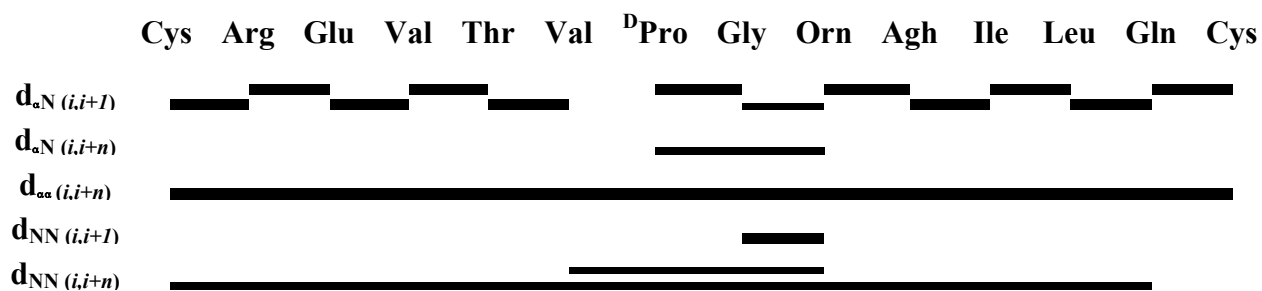

HPDUGluAgh

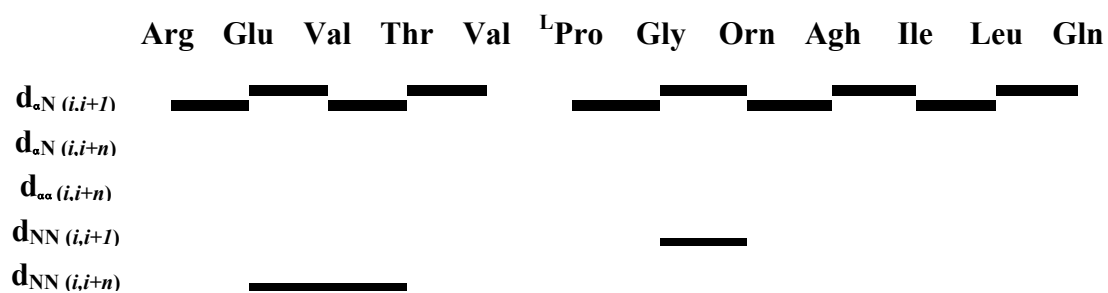

**Figure S49.** Wüthrich diagram of peptides HPDGluAgh, HPDFGluAgh, HPDUGluAgh. Only the backbone NOE connectivities are shown.

# HPDAadAgh

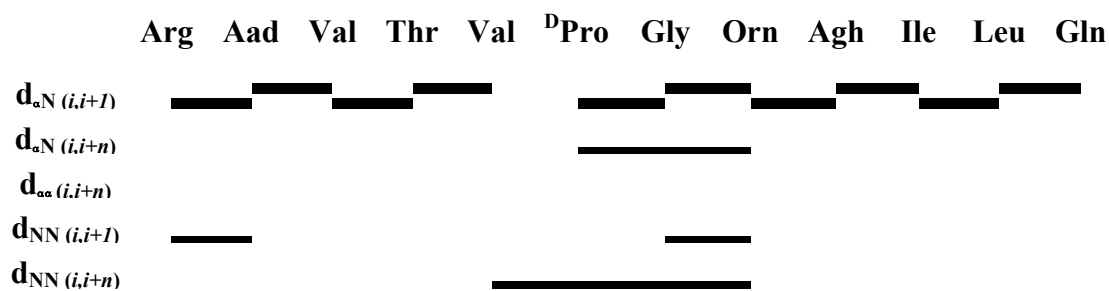

# HPDFAadAgh

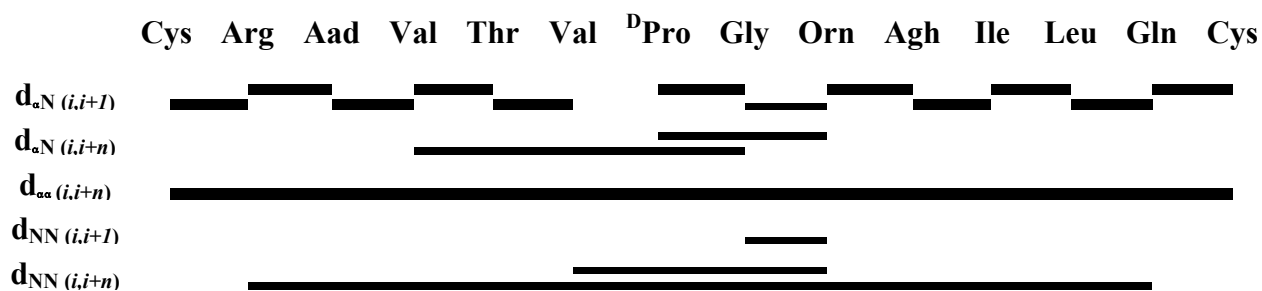

# HPDUAadAgh

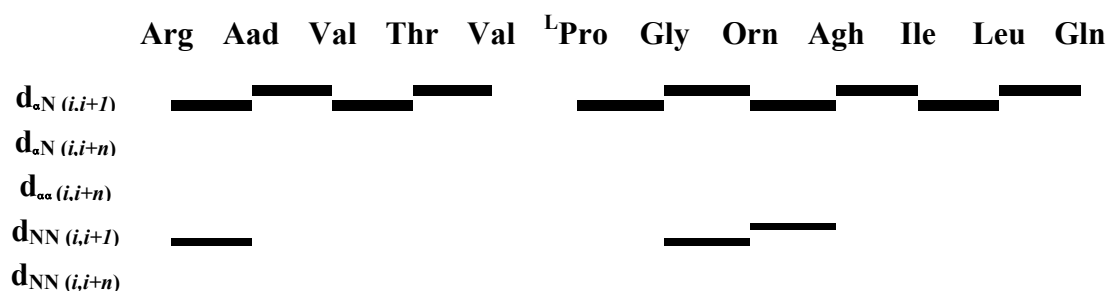

**Figure S50.** Wüthrich diagram of peptides HPDAadAgh, HPDFAadAgh, HPDUAadAgh. Only the backbone NOE connectivities are shown.

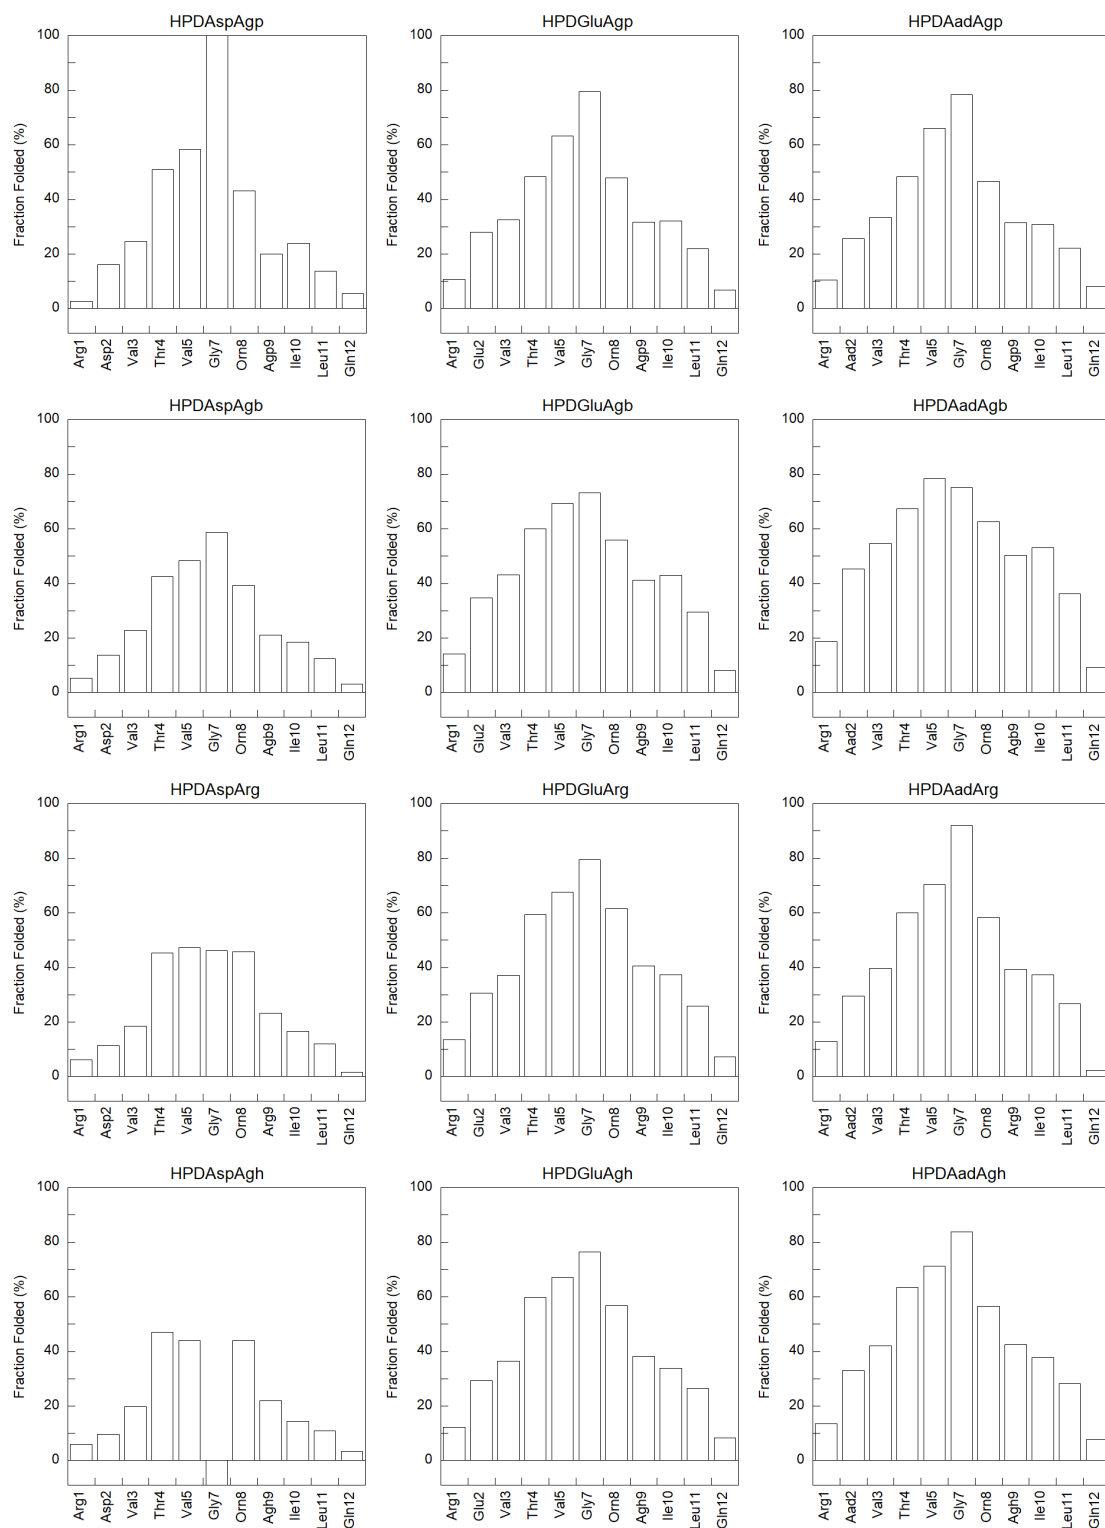

**Figure S51.** The fraction folded of all residues for the HPDZbbXaa peptides.

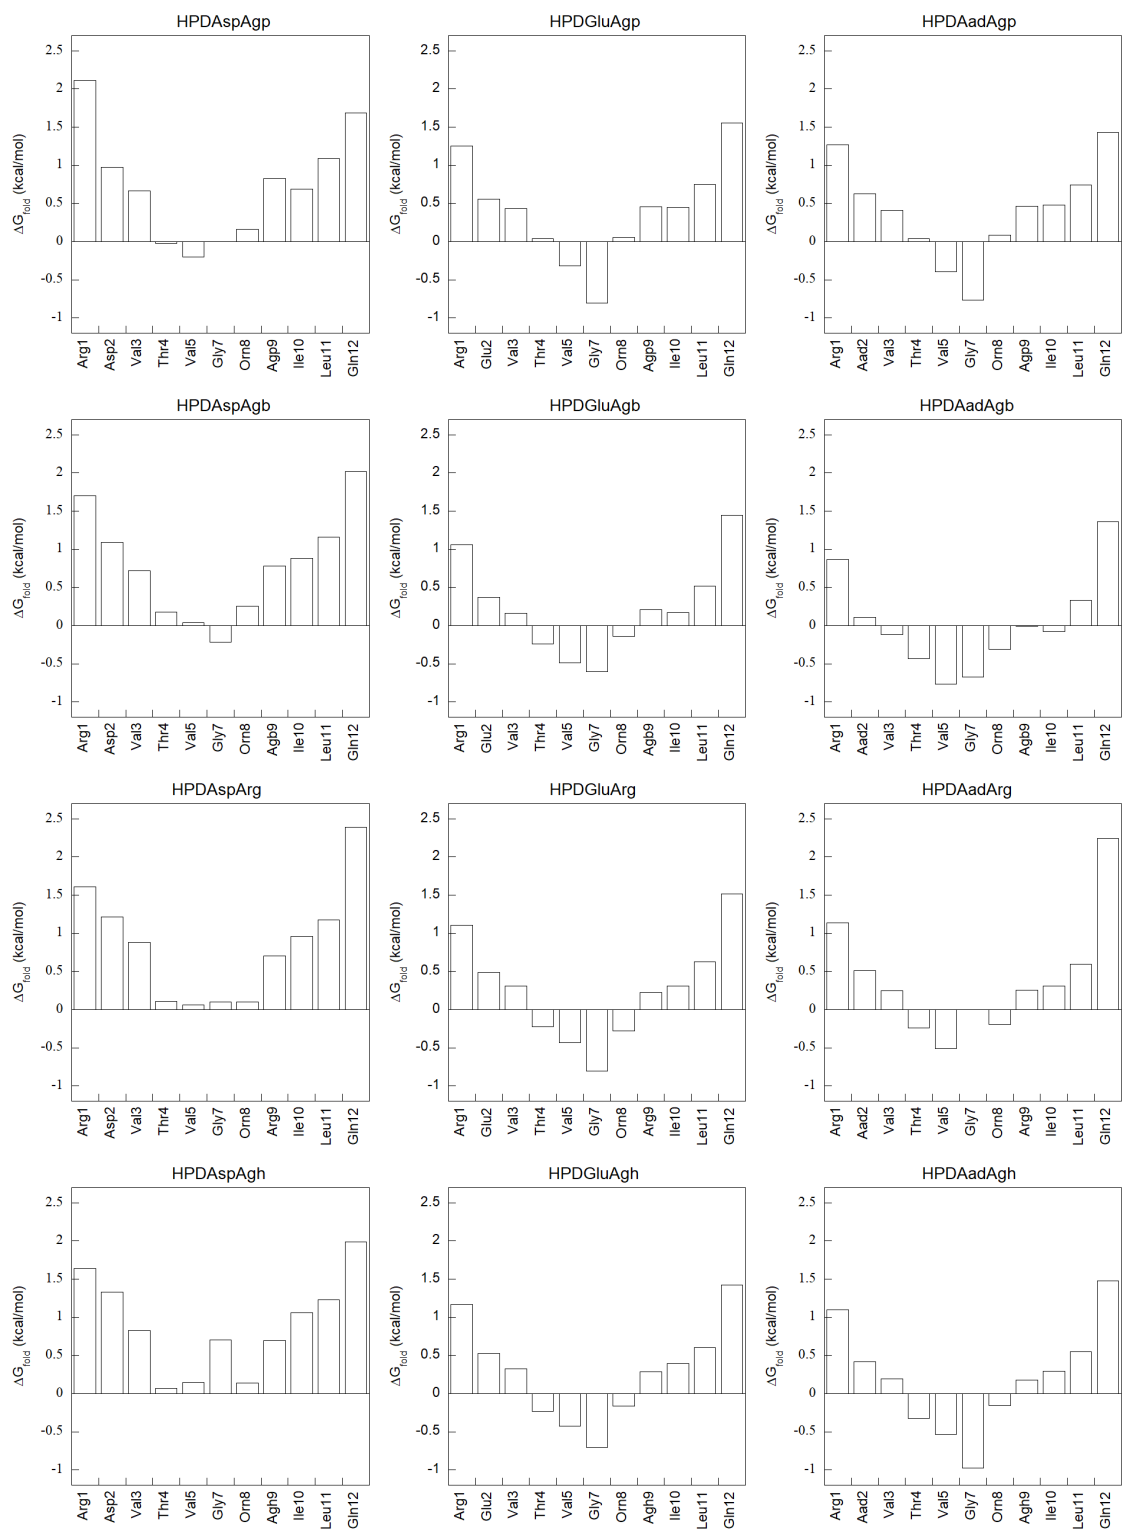

**Figure S52.** The  $\Delta G_{\text{fold}}$  of all residues for the HPDZbbXaa peptides.

## Material and Methods

### *General Section*

All reagents and solvents were used without purification. Diisopropylethylamine (DIEA), piperidine, trifluoroacetic acid (TFA), acetic anhydride ( $\text{Ac}_2\text{O}$ ) were purchased from Acros. Dimethylformamide (DMF), methanol, and acetonitrile were purchased from Merck. N-9-fluorenylmethoxycarbonyl (Fmoc)-amino acids except those indicated otherwise were from Novabiochem. Fmoc-L-Agp(Pbf,Boc)-OH and Fmoc-L-Agb(Pbf,Boc)-OH were from Iris Biotec.  $\text{N}_\alpha$ -Fmoc-aminoadipic acid- $\delta$ -t-butyl ester was from BaChem. 1-Hydroxybenzotriazole (HOBt), 2-(1H-benzotriazole-1-yl)-1, 1, 3, 3 -tetramethyluronium hexafluorophosphate (HBTU), NovaSyn<sup>®</sup> TGR resin were from NovaBiochem. Hexanes were from Duksan. Analytical reverse phase (RP)-HPLC was performed on an Agilent 1200 series chromatography system using a Vydac  $\text{C}_{18}$  column (4.6 mm diameter, 250 mm length). Preparative RP-HPLC was performed on Waters Breeze chromatography system using a Seppak<sup>®</sup> plus short  $\text{tC}_{18}$  cartridges, Vydac  $\text{C}_4$  or  $\text{C}_{18}$  column (22 mm diameter, 250 mm length) Mass spectrometry of the peptides was performed on a matrix-assisted laser desorption ionization time-of-flight (MALDI-TOF) (Bruker BIFLEX) using  $\alpha$ -cyano-4-hydroxycinnamic acid as the matrix. 2-Dimensional nuclear magnetic resonance spectroscopy experiments were performed on the Bruker AV III 800MHz spectrometer.

### *Peptide Synthesis*

The peptides were synthesized by solid phase peptide synthesis using Fmoc-based chemistry [1, 2]. NovaSyn<sup>®</sup> TGR resin (0.050 mmol) was swollen in N, N-dimethylformamide (DMF, 3 mL) for 30 minutes. A mixture of 3 equivalents of the appropriately protected Fmoc-amino acid, HOBt, and HBTU was dissolved in DMF (1 mL). Diisopropylethylamine (DIEA, 8 equivalents) was then added to the solution and mixed thoroughly. The solution was then applied to the resin. The vial that contained the solution was rinsed with DMF (2x1 mL) and added to the reaction. The first coupling was carried out for 8 hours. The 8th to 14th residues were coupled for 1.5 hours. Other residues were coupled for 45 minutes. The residue with  $\beta$ -branching and the residue after it were coupled for double the time. After each coupling, the resin was washed with DMF (5 mL, 5x1 min). The Fmoc-group was then removed by 20% piperidine/DMF (5 mL, 3x8 min). After the final residue was coupled, a solution of acetic anhydride (20 equivalents), DIEA (20 equivalents), and DMF (3 mL) was added to resin for acetyl capping. The reaction was shaken for 2 hours.

Peptides were deprotected and cleaved off the resin by treating the resin with 5 mL 95:5 trifluoroacetic acid (TFA)/triisopropylsilane and shaken for 2 hours. For Cys-containing peptides, 5 mL 90:5:5 trifluoroacetic acid (TFA)/triisopropylsilane/ethanedithiol was used instead. The solution was then filtered through glass wool and the resin was washed with TFA (3x1.5 mL). The combined filtrate was evaporated by a gentle stream of air (nitrogen gas was used for the Cys-containing peptides). The resulting material was washed with hexanes (3x3 mL), dissolved in water, and lyophilized. The peptide (1 mg/ mL, aqueous solution) was analyzed using analytical RP-HPLC on a 25 cm  $\text{C}_{18}$  column (dia 4.6 mm) with flow rate 1 mL/min, temperature 25°C, linear 1 %/ min gradient from 100% A to 0% A (solvent A: 99.9% water, 0.1% TFA; solvent B: 90%

acetonitrile, 10% water, 0.1% TFA). The disulfide bond of the Cys-containing HPDFZbbAgx peptides were formed via charcoal mediated air oxidation [3]. Peptides were purified to higher than 95% purity by Sep-Pak® Plus Short tC18 cartridges using an appropriate percentage of B solvent and by reverse phase HPLC using a preparative C<sub>18</sub> column with flow rate 10 mL·min<sup>-1</sup>, temperature 25°C, linear 0.5 %·min<sup>-1</sup> gradient. Appropriate linear gradients of solvent A and solvent B were used for each peptide to place the retention time for the desired peptide between 20 and 30 minutes. These gradients are listed individually for each peptide (vide infra); for example, PLG18\_28 was used to purify HPDAspAgp using a C<sub>18</sub> column, representing the linear gradient from 18 % B to 28 % B (flow rate 10 mL·min<sup>-1</sup>, temperature 25°C, linear 0.5 %·min<sup>-1</sup> gradient). The identity of the peptide was confirmed by MALDI-TOF.

### **HPDAspAgp**

(Ac-Arg-Asp-Val-Thr-Val-<sup>D</sup>Pro-Gly-Orn-Agp-Ile-Leu-Gln-NH<sub>2</sub>)

The peptide was synthesized using 532.6 mg (0.133 mmol) of NovaSyn®TGR resin. The synthesis gave 721.1 mg of resin (68.1% yield). The cleavage yielded 141.4 mg of crude peptide (98.5% yield). Retention time on the analytical reverse phase HPLC was 28.2 minutes. The peptide was purified by a Sep-Pak® Plus Short tC18 cartridge (30% B solvent) and preparative RP-HPLC using a C18 (PLG18\_28) column to 95.5% purity (1.7 mg). The identity of the peptide was confirmed by MALDI-TOF mass spectrometry. Calculated for C<sub>59</sub>H<sub>105</sub>N<sub>21</sub>O<sub>17</sub> [MH<sup>+</sup>]: 1380.807; observed: 1381.120. The concentration of peptide for NMR analysis was 2.5 mM.

### **HPDGluAgp**

(Ac-Arg-Glu-Val-Thr-Val-<sup>D</sup>Pro-Gly-Orn-Agp-Ile-Leu-Gln-NH<sub>2</sub>)

The peptide was synthesized using 214.1 mg (0.054 mmol) of NovaSyn®TGR resin. The synthesis gave 302.3 mg of resin (74.9% yield). The cleavage yielded 55.8 mg of crude peptide (80.9% yield). Retention time on the analytical reverse phase HPLC was 27.7 minutes. The peptide was purified by a Sep-Pak® Plus Short tC18 cartridge (30% B solvent) and preparative RP-HPLC using a C18 (PLG17\_27) column to 95.0% purity (2.8 mg). The identity of the peptide was confirmed by MALDI-TOF mass spectrometry. Calculated for C<sub>60</sub>H<sub>107</sub>N<sub>21</sub>O<sub>17</sub> [MH<sup>+</sup>]: 1394.823; observed: 1394.948. The concentration of peptide for NMR analysis was 4.0 mM.

### **HPDAadAgp**

(Ac-Arg-Aad-Val-Thr-Val-<sup>D</sup>Pro-Gly-Orn-Agp-Ile-Leu-Gln-NH<sub>2</sub>)

The peptide was synthesized using 222.4 mg (0.056 mmol) of NovaSyn®TGR resin. The synthesis gave 288.9 mg of resin (53.7% yield). The cleavage yielded 74.6 mg of crude peptide (>99% yield). Retention time on the analytical reverse phase HPLC was 28.0 minutes. The peptide was purified by a Sep-Pak® Plus Short tC18 cartridge and preparative RP-HPLC using a C18 (PLG18\_28) column to 95.2% purity (4.4 mg). The identity of the peptide was confirmed by MALDI-TOF mass spectrometry. Calculated for C<sub>61</sub>H<sub>109</sub>N<sub>21</sub>O<sub>17</sub> [MH<sup>+</sup>]: 1408.838; observed:



1409.090. The concentration of peptide for NMR analysis was 6.2 mM.

### **HPDAspAgb**

(Ac-Arg-Asp-Val-Thr-Val-<sup>D</sup>Pro-Gly-Orn-Agb-Ile-Leu-Gln-NH<sub>2</sub>)

The peptide was synthesized using 210.9 mg (0.051 mmol) of NovaSyn®TGR resin. The synthesis gave 306.0 mg of resin (92.0% yield). The cleavage yielded 80.8 mg of crude peptide (94.1% yield). Retention time on the analytical reverse phase HPLC was 28.4 minutes. The peptide was purified by preparative RP-HPLC using a C4 (PLG8\_18) column and a C18 (PLG17\_27) column to 95.3% purity (3.1 mg). The identity of the peptide was confirmed by MALDI-TOF mass spectrometry. Calculated for C<sub>60</sub>H<sub>107</sub>N<sub>21</sub>O<sub>17</sub> [MH<sup>+</sup>]: 1394.823; observed: 1394.972. The concentration of peptide for NMR analysis was 4.4 mM.

### **HPDGluAgb**

(Ac-Arg-Glu-Val-Thr-Val-<sup>D</sup>Pro-Gly-Orn-Agb-Ile-Leu-Gln-NH<sub>2</sub>)

The peptide was synthesized using 219.5 mg (0.055 mmol) of NovaSyn®TGR resin. The synthesis gave 326.0 mg of resin (87.1% yield). The cleavage yielded 62.5 mg of crude peptide (73.3% yield). Retention time on the analytical reverse phase HPLC was 27.2 minutes. The peptide was purified by preparative RP-HPLC using a C4 (PLG7\_17) column and a C18 (PLG17\_27) column to 95.2% purity (8.1 mg). The identity of the peptide was confirmed by MALDI-TOF mass spectrometry. Calculated for C<sub>61</sub>H<sub>109</sub>N<sub>21</sub>O<sub>17</sub> [MH<sup>+</sup>]: 1408.838; observed: 1409.145. The concentration of peptide for NMR analysis was 7.7 mM.

### **HPDAadAgb**

(Ac-Arg-Aad-Val-Thr-Val-<sup>D</sup>Pro-Gly-Orn-Agb-Ile-Leu-Gln-NH<sub>2</sub>)

The peptide was synthesized using 243.5 mg (0.061 mmol) of NovaSyn®TGR resin. The synthesis gave 323.1 mg of resin (58.6% yield). The cleavage yielded 58.2 mg of crude peptide (99.7% yield). Retention time on the analytical reverse phase HPLC was 26.9 minutes. The peptide was purified by a Sep-Pak® Plus Short tC18 cartridge and preparative RP-HPLC using a C18 (PLG17\_27) column to 95.8% purity (10.6 mg). The identity of the peptide was confirmed by MALDI-TOF mass spectrometry. Calculated for C<sub>62</sub>H<sub>111</sub>N<sub>21</sub>O<sub>17</sub> [MH<sup>+</sup>]: 1422.854; observed: 1423.090. The concentration of peptide for NMR analysis was 8.8 mM.

### **HPDAspArg**

(Ac-Arg-Asp-Val-Thr-Val-<sup>D</sup>Pro-Gly-Orn-Arg-Ile-Leu-Gln-NH<sub>2</sub>)

The peptide was synthesized using 212.0 mg (0.053 mmol) of NovaSyn®TGR resin. The synthesis gave 327.9 mg of resin (>99% yield). The cleavage yielded 49.3 mg of crude peptide (52.2% yield). Retention time on the analytical reverse phase HPLC was 28.5 minutes. The peptide was purified by a Sep-Pak® Plus Short tC18 cartridge (30% B solvent) and preparative RP-HPLC using a C18 (PLG17\_27) column to 98.2% purity (12.3 mg). The identity of the peptide was confirmed by MALDI-TOF mass spectrometry. Calculated for C<sub>61</sub>H<sub>109</sub>N<sub>21</sub>O<sub>17</sub> [MH<sup>+</sup>]: 1408.838;

observed: 1408.717. The concentration of peptide for NMR analysis was 8.73 mM.

#### **HPDGluArg**

(Ac-Arg-Glu-Val-Thr-Val-<sup>D</sup>Pro-Gly-Orn-Arg-Ile-Leu-Gln-NH<sub>2</sub>)

The peptide was synthesized using 201.3 mg (0.050 mmol) of NovaSyn®TGR resin. The synthesis gave 306.2 mg of resin (97.3% yield). The cleavage yielded 87.1 mg of crude peptide (>99% yield). Retention time on the analytical reverse phase HPLC was 27.7 minutes. The peptide was purified by preparative RP-HPLC using a C4 (PLG8\_18) column and a C18 (PLG16\_26) column to 95.3% purity (9.5 mg). The identity of the peptide was confirmed by MALDI-TOF mass spectrometry. Calculated for C<sub>62</sub>H<sub>111</sub>N<sub>21</sub>O<sub>17</sub> [MH<sup>+</sup>]: 1422.854; observed: 1422.939. The concentration of peptide for NMR analysis was 8.3 mM.

#### **HPDAadArg**

(Ac-Arg-Aad-Val-Thr-Val-<sup>D</sup>Pro-Gly-Orn-Arg-Ile-Leu-Gln-NH<sub>2</sub>)

The peptide was synthesized using 206.7 mg (0.052 mmol) of NovaSyn®TGR resin. The synthesis gave 327.7 mg of resin (>99% yield). The cleavage yielded 77.1 mg of crude peptide (85.4% yield). Retention time on the analytical reverse phase HPLC was 27.8 minutes. The peptide was purified by a Sep-Pak® Plus Short tC18 cartridge (30% B solvent) and preparative RP-HPLC using a C18 (PLG16\_26) column to 98.2% purity (19.0 mg). The identity of the peptide was confirmed by MALDI-TOF mass spectrometry. Calculated for C<sub>63</sub>H<sub>113</sub>N<sub>21</sub>O<sub>17</sub> [MH<sup>+</sup>]: 1436.870; observed: 1436.974. The concentration of peptide for NMR analysis was 8.82 mM.

#### **HPDAspAgh**

(Ac-Arg-Asp-Val-Thr-Val-<sup>D</sup>Pro-Gly-Orn-Agh-Ile-Leu-Gln-NH<sub>2</sub>)

The peptide was synthesized using 204.2 mg (0.051 mmol) of NovaSyn®TGR resin. The synthesis gave 288.5 mg of resin (79.0% yield). The cleavage yielded 74.3 mg of crude peptide (>99% yield). Retention time on the analytical reverse phase HPLC was 28.6 minutes. The peptide was purified by preparative RP-HPCL using a C4 (PLG8\_18) column and a C18 (PLG17\_27) column to 95.3% purity (7.4 mg). The identity of the peptide was confirmed by MALDI-TOF mass spectrometry. Calculated for C<sub>62</sub>H<sub>111</sub>N<sub>21</sub>O<sub>17</sub> [MH<sup>+</sup>]: 1422.854; observed: 1422.936. The concentration of peptide for NMR analysis was 8.4 mM.

#### **HPDGluAgh**

(Ac-Arg-Glu-Val-Thr-Val-<sup>D</sup>Pro-Gly-Orn-Agh-Ile-Leu-Gln-NH<sub>2</sub>)

The peptide was synthesized using 202.1 mg (0.051 mmol) of NovaSyn®TGR resin. The synthesis gave 280.7 mg of resin (73.6% yield). The cleavage yielded 54.0 mg of crude peptide (81% yield). Retention time on the analytical reverse phase HPLC was 27.9 minutes. The peptide was purified by preparative RP-HPCL using a C4 (PLG7\_17) and a C18 (PLG16\_26) column to 95.4% purity (9.2 mg). The identity of the peptide was confirmed by MALDI-TOF mass spectrometry. Calculated for C<sub>63</sub>H<sub>113</sub>N<sub>21</sub>O<sub>17</sub> [MH<sup>+</sup>]: 1436.870; observed: 1436.968. The

concentration of peptide for NMR analysis was 8.5 mM.

#### **HPDAadAgh**

(Ac-Arg-Aad-Val-Thr-Val-<sup>D</sup>Pro-Gly-Orn-Agh-Ile-Leu-Gln-NH<sub>2</sub>)

The peptide was synthesized using 204.5 mg (0.051 mmol) of NovaSyn®TGR resin. The synthesis gave 285.1 mg of resin (74.4% yield). The cleavage yielded 76.5 mg of crude peptide (48.8% yield). Retention time on the analytical reverse phase HPLC was 27.9 minutes. The peptide was purified by preparative RP-HPLC using a C4 (PLG8\_18) column to 95.2% purity (11.0 mg). The identity of the peptide was confirmed by MALDI-TOF mass spectrometry. Calculated for C<sub>64</sub>H<sub>115</sub>N<sub>21</sub>O<sub>17</sub> [MH<sup>+</sup>]: 1450.885; observed: 1450.836. The concentration of peptide for NMR analysis was 7.58 mM.

#### **HPDUAspAgp**

(Ac-Arg-Asp-Val-Thr-Val-<sup>L</sup>Pro-Gly-Orn-Agp-Ile-Leu-Gln-NH<sub>2</sub>)

The peptide was synthesized using 224.4 mg (0.056 mmol) of NovaSyn®TGR resin. The synthesis gave 330.0 mg of resin (85.5% yield). The cleavage yielded 62.2 mg of crude peptide (74.4% yield). Retention time on the analytical reverse phase HPLC was 25.6 minutes. The peptide was purified by a Sep-Pak® Plus Short tC18 cartridge (30% B solvent) and preparative RP-HPLC using a C18 (PLG16\_26) column to 96.5% purity (3.0 mg). The identity of the peptide was confirmed by MALDI-TOF mass spectrometry. Calculated for C<sub>59</sub>H<sub>105</sub>N<sub>21</sub>O<sub>17</sub> [MH<sup>+</sup>]: 1380.807; observed: 1381.036. The concentration of peptide for NMR analysis was 4.3 mM.

#### **HPDUGluAgp**

(Ac-Arg-Glu-Val-Thr-Val-<sup>L</sup>Pro-Gly-Orn-Agp-Ile-Leu-Gln-NH<sub>2</sub>)

The peptide was synthesized using 247.0 mg (0.062 mmol) of NovaSyn®TGR resin. The synthesis gave 338.4 mg of resin (66.8% yield). The cleavage yielded 78.8 mg of crude peptide (>99% yield). Retention time on the analytical reverse phase HPLC was 25.6 minutes. The peptide was purified by a Sep-Pak® Plus Short tC18 cartridge (30% B solvent) and preparative RP-HPLC using a C18 (PLG16\_26) column to 96.1% purity (1.9 mg). The identity of the peptide was confirmed by MALDI-TOF mass spectrometry. Calculated for C<sub>60</sub>H<sub>107</sub>N<sub>21</sub>O<sub>17</sub> [MH<sup>+</sup>]: 1394.823; observed: 1394.948. The concentration of peptide for NMR analysis was 2.7 mM.

#### **HPDUAadAgp**

(Ac-Arg-Aad-Val-Thr-Val-<sup>L</sup>Pro-Gly-Orn-Agp-Ile-Leu-Gln-NH<sub>2</sub>)

The peptide was synthesized using 224.0 mg (0.056 mmol) of NovaSyn®TGR resin. The synthesis gave 295.9 mg of resin (57.6% yield). The cleavage yielded 71.5 mg of crude peptide (>99% yield). Retention time on the analytical reverse phase HPLC was 26.1 minutes. The peptide was purified by a Sep-Pak® Plus Short tC18 cartridge (30% B solvent) and preparative RP-HPLC using a C18 (PLG16\_26) column to 95.6% purity (3.2 mg). The identity of the peptide was

confirmed by MALDI-TOF mass spectrometry. Calculated for  $C_{61}H_{109}N_{21}O_{17}[MH^+]$ : 1408.838; observed: 1409.059. The concentration of peptide for NMR analysis was 4.5 mM.

### **HPDUAspAgb**

(Ac-Arg-Asp-Val-Thr-Val-<sup>L</sup>Pro-Gly-Orn-Agb-Ile-Leu-Gln-NH<sub>2</sub>)

The corresponding Dab(ivDde)-containing peptide (Ac-Arg-Asp-Val-Thr-Val-<sup>L</sup>Pro-Gly-Orn-Dab(ivDde)-Ile-Leu-Gln-NH<sub>2</sub>) was synthesized using 200.7 mg (0.050 mmole) of NovaSyn®TGR resin. Retention time on the analytical reverse phase HPLC was 37.1 minutes. The identity of peptide was confirmed by MALDI-TOF mass spectrometry. Calculated for  $C_{77}H_{123}N_{19}O_{19}[MH^+]$ : 1558.932; observed: 1559.436. The (4,4-dimethyl-2,6-dioxocyclohexylidene)-3-methylbutyl (ivDde) group on the protected HPDUAspDab(ivDde) bound resin was removed selectively using 2% hydrazine in DMF (2 mL, 10 × 8 min) under microwave conditions (power 240 W, 10 × 20 sec). Then, 6% hydrazine in NMP (2 mL, 10 × 8 min) under microwave conditions (power 240 W, 10 × 20 sec) was used to cleave the ivDde group completely. The resin was reacted with a solution of N,N'-di-Boc-N''-trifluoromethanesulfonylguanidine (282.5 mg, 0.72 mmole), N,N-diisopropylethyl- amine (240 µL), and DCM (1.5 mL) under microwave conditions (power 240 W, 2000 × 20 sec). Retention time of the guanidinylated product on the analytical reverse phase HPLC was 25.9 minutes. The synthesis gave 279.0 mg of resin (75.7% yield). The cleavage yielded 54.3 mg of crude peptide (69.2% yield). The peptide was purified by a Sep-Pak® Plus Short tC18 cartridge (25% B solvent) and preparative RP-HPLC using a C18 (PLG15\_25) column to 96.1% purity (2.1 mg). The identity of the peptide was confirmed by MALDI-TOF mass spectrometry. Calculated for  $C_{60}H_{107}N_{21}O_{17}[MH^+]$ : 1394.823; observed: 1394.858. The concentration of peptide for NMR analysis was 3.0 mM.

### **HPDUGluAgb**

(Ac-Arg-Glu-Val-Thr-Val-<sup>L</sup>Pro-Gly-Orn-Agb-Ile-Leu-Gln-NH<sub>2</sub>)

The peptide was synthesized using 245.8 mg (0.061 mmol) of NovaSyn®TGR resin. The synthesis gave 340.6mg of resin (69.2% yield). The cleavage yielded 58.7 mg of crude peptide (78.7% yield). Retention time on the analytical reverse phase HPLC was 25.5 minutes. The peptide was purified by preparative RP-HPLC using a C4 (PLG5\_15) column to 96.1% purity (11.1 mg). The identity of the peptide was confirmed by MALDI-TOF mass spectrometry. Calculated for  $C_{61}H_{109}N_{21}O_{17}[MH^+]$ : 1408.838; observed: 1409.037. The concentration of peptide for NMR analysis was 7.88 mM.

### **HPDUAadAgb**

(Ac-Arg-Aad-Val-Thr-Val-<sup>L</sup>Pro-Gly-Orn-Agb-Ile-Leu-Gln-NH<sub>2</sub>)

The peptide was synthesized using 243.7 mg (0.061 mmol) of NovaSyn®TGR resin. The synthesis gave 332.9 mg of resin (65.3% yield). The cleavage yielded 69.4 mg of crude peptide (>99% yield). Retention time on the analytical reverse phase HPLC was 25.9 minutes. The peptide

was purified by preparative RP-HPLC using a C4 (PLG5\_15) column and a C18 (PLG16\_26 column) to 97.1% purity (9.6 mg). The identity of the peptide was confirmed by MALDI-TOF mass spectrometry. Calculated for  $C_{62}H_{111}N_{21}O_{17}$   $[MH^+]$ : 1422.854; observed: 1422.759. The concentration of peptide for NMR analysis was 8.4 mM.

### **HPDUAspArg**

(Ac-Arg-Asp-Val-Thr-Val-<sup>L</sup>Pro-Gly-Orn-Arg-Ile-Leu-Gln-NH<sub>2</sub>)

The peptide was synthesized using 216.7 mg (0.054 mmol) of NovaSyn®TGR resin. The synthesis gave 322.9 mg of resin (92.1% yield). The cleavage yielded 67.8 mg of crude peptide (78.2% yield). Retention time on the analytical reverse phase HPLC was 26.0 minutes. The peptide was purified by preparative RP-HPLC using a C4 (PLG5\_15) column and a C18 (PLG15\_25) column to 97.1% purity (14.3 mg). The identity of the peptide was confirmed by MALDI-TOF mass spectrometry. Calculated for  $C_{61}H_{109}N_{21}O_{17}$   $[MH^+]$ : 1408.838; observed: 1408.767. The concentration of peptide for NMR analysis was 8.5 mM.

### **HPDUGluArg**

(Ac-Arg-Glu-Val-Thr-Val-<sup>L</sup>Pro-Gly-Orn-Arg-Ile-Leu-Gln-NH<sub>2</sub>)

The peptide was synthesized using 200.9 mg (0.050 mmol) of NovaSyn®TGR resin. The synthesis gave 370.1 mg of resin (>99% yield). The cleavage yielded 64.9 mg of crude peptide (47.4% yield). Retention time on the analytical reverse phase HPLC was 25.9 minutes. The peptide was purified by preparative RP-HPLC using a C4 (PLG5\_15) column to 96.0% purity (17.1 mg). The identity of the peptide was confirmed by MALDI-TOF mass spectrometry. Calculated for  $C_{62}H_{111}N_{21}O_{17}$   $[MH^+]$ : 1422.854; observed: 1422.883. The concentration of peptide for NMR analysis was 6.01 mM.

### **HPDUAadArg**

(Ac-Arg-Aad-Val-Thr-Val-<sup>L</sup>Pro-Gly-Orn-Arg-Ile-Leu-Gln-NH<sub>2</sub>)

The peptide was synthesized using 206.7 mg (0.052 mmol) of NovaSyn®TGR resin. The synthesis gave 308.8 mg of resin (91.6% yield). The cleavage yielded 60.6 mg of crude peptide (79.4% yield). Retention time on the analytical reverse phase HPLC was 26.5 minutes. The peptide was purified by a Sep-Pak® Plus Short tC18 cartridge (30% B solvent) and preparative RP-HPLC using a C18 (PLG15\_25) column to 97.3% purity (11.4 mg). The identity of the peptide was confirmed by MALDI-TOF mass spectrometry. Calculated for  $C_{63}H_{113}N_{21}O_{17}$   $[MH^+]$ : 1436.870; observed: 1436.958. The concentration of peptide for NMR analysis was 7.93 mM.

### **HPDUAspAgh**

(Ac-Arg-Asp-Val-Thr-Val-<sup>L</sup>Pro-Gly-Orn-Agh-Ile-Leu-Gln-NH<sub>2</sub>)

The peptide was synthesized using 200.6 mg (0.050 mmol) of NovaSyn®TGR resin. The synthesis gave 290.7 mg of resin (85.9% yield). The cleavage yielded 75.0 mg of crude peptide (88.0% yield). Retention time on the analytical reverse phase HPLC was 26.3 minutes. The peptide

was purified by a Sep-Pak<sup>®</sup> Plus Short tC18 cartridge (30% B solvent) and preparative RP-HPLC using a C18 (PLG15\_25) column to 95.2% purity (5.8 mg). The identity of the peptide was confirmed by MALDI-TOF mass spectrometry. Calculated for C<sub>62</sub>H<sub>111</sub>N<sub>21</sub>O<sub>17</sub> [MH<sup>+</sup>]: 1422.854; observed: 1422.973. The concentration of peptide for NMR analysis was 8.5 mM.

#### **HPDUGluAgh**

(Ac-Arg-Glu-Val-Thr-Val-<sup>L</sup>Pro-Gly-Orn-Agh-Ile-Leu-Gln-NH<sub>2</sub>)

The peptide was synthesized using 204.1 mg (0.051 mmol) of NovaSyn®TGR resin. The synthesis gave 295.5 mg of resin (85.1% yield). The cleavage yielded 46.2 mg of crude peptide (46.2% yield). Retention time on the analytical reverse phase HPLC was 26.3 minutes. The peptide was purified by preparative RP-HPLC using a C4 (PLG4\_14) column to 95.4% purity (9.8 mg). The identity of the peptide was confirmed by MALDI-TOF mass spectrometry. Calculated for C<sub>63</sub>H<sub>113</sub>N<sub>21</sub>O<sub>17</sub> [MH<sup>+</sup>]: 1436.870; observed: 1436.963. The concentration of peptide for NMR analysis was 8.5 mM.

#### **HPDUAadAgh**

(Ac-Arg-Aad-Val-Thr-Val-<sup>L</sup>Pro-Gly-Orn-Agh-Ile-Leu-Gln-NH<sub>2</sub>)

The peptide was synthesized using 200.7 mg (0.050 mmol) of NovaSyn®TGR resin. The synthesis gave 286.3 mg of resin (80.5% yield). The cleavage yielded 56.2 mg of crude peptide (83.8% yield). Retention time on the analytical reverse phase HPLC was 27.9 minutes. The peptide was purified by preparative RP-HPLC using a C4 (PLG5\_15) column to 95.5% purity (14.0 mg). The identity of the peptide was confirmed by MALDI-TOF mass spectrometry. Calculated for C<sub>64</sub>H<sub>115</sub>N<sub>21</sub>O<sub>17</sub> [MH<sup>+</sup>]: 1450.885; observed: 1450.854. The concentration of peptide for NMR analysis was 8.04 mM.

#### **HPDFAspAgp**

(Ac-Cys-Arg-Asp-Val-Thr-Val-<sup>D</sup>Pro-Gly-Orn-Agp-Ile-Leu-Gln-Cys-NH<sub>2</sub>[O] )

The peptide was synthesized using 251.2 mg (0.063 mmol) of NovaSyn®TGR resin. The synthesis gave 347.2 mg of resin (52.9% yield). The cleavage yielded 59.1 mg of crude peptide (91.0% yield). Retention time on the analytical RP-HPLC was 30.1 minutes. Calculated for C<sub>65</sub>H<sub>115</sub>N<sub>23</sub>O<sub>19</sub>C<sub>64</sub>S<sub>2</sub> [MH<sup>+</sup>]: 1586.825; observed: 1586.993. The crude peptide was dissolved in 1 mM pH 8 phosphate, citrate and borate buffer (60 mL). Granulated charcoal (577.3 mg) was added to the peptide solution [3]. After stirring over air for 2.5 hours, the cyclized peptide was purified by a Sep-Pak<sup>®</sup> Plus Short tC18 cartridge (30% B solvent) and preparative RP-HPLC using a C18 (PLG17\_27) column to 95.7% purity (2.5 mg). The retention time of the cyclized peptide on the analytical RP-HPLC was 27.2 minutes. The identity of the peptide was confirmed by MALDI-TOF mass spectrometry. Calculated for C<sub>65</sub>H<sub>113</sub>N<sub>23</sub>O<sub>19</sub>C<sub>64</sub>S<sub>2</sub> [MH<sup>+</sup>]: 1584.810; observed: 1584.875. The concentration of peptide for NMR analysis was 3.2 mM.

### HPDFGluAgp

(Ac-Cys-Arg-Glu-Val-Thr-Val-<sup>D</sup>Pro-Gly-Orn-Agp-Ile-Leu-Gln-Cys-NH<sub>2</sub>[O] )

The peptide was synthesized using 257.2 mg (0.064 mmol) of NovaSyn®TGR resin. The synthesis gave 357.4 mg of resin (53.6% yield). The cleavage yielded 60.5 mg of crude peptide (87.6% yield). Retention time on the analytical RP-HPLC was 29.8 minutes. Calculated for C<sub>66</sub>H<sub>117</sub>N<sub>23</sub>O<sub>19</sub>S<sub>2</sub> [MH<sup>+</sup>]: 1600.841; observed: 1601.022. The crude peptide was dissolved in 1 mM pH 8 phosphate, citrate and borate buffer (80 mL). Granulated charcoal (572.4 mg) was added to the peptide solution [3]. After stirring over air for 2.5 hours, the cyclized peptide was purified by preparative RP-HPLC using a C4 (PLG11\_21) column and a C18 (PLG17\_27) column to 95.4% purity (1.1 mg). The retention time of the cyclized peptide on the analytical RP-HPLC was 27.3 minutes. The identity of the peptide was confirmed by MALDI-TOF mass spectrometry. Calculated for C<sub>66</sub>H<sub>115</sub>N<sub>23</sub>O<sub>19</sub>S<sub>2</sub> [MH<sup>+</sup>]: 1598.825; observed: 1598.743. The concentration of peptide for NMR analysis was 1.4 mM.

### HPDFAadAgp

(Ac-Cys-Arg-Aad-Val-Thr-Val-<sup>D</sup>Pro-Gly-Orn-Agp-Ile-Leu-Gln-Cys-NH<sub>2</sub>[O] )

The peptide was synthesized using 255.5 mg (0.064 mmol) of NovaSyn®TGR resin. The synthesis gave 361.0 mg of resin (56.6% yield). The cleavage yielded 63.7 mg of crude peptide (96.9% yield). Retention time on the analytical RP-HPLC was 30.0 minutes. Calculated for C<sub>67</sub>H<sub>119</sub>N<sub>23</sub>O<sub>19</sub>S<sub>2</sub> [MH<sup>+</sup>]: 1614.857; observed: 1615.118. The crude peptide was dissolved in 1 mM pH 8 phosphate, citrate and borate buffer (80 mL). Granulated charcoal (626.8 mg) was added to the peptide solution [3]. After stirring over air for 3 hours, the cyclized peptide was purified by a Sep-Pak® Plus Short tC18 cartridge (30% B solvent) and preparative RP-HPLC using a C18 (PLG18\_28) column to 95.2% purity (2.6 mg). The retention time of the cyclized peptide on the analytical RP-HPLC was 27.6 minutes. The identity of the peptide was confirmed by MALDI-TOF mass spectrometry. Calculated for C<sub>67</sub>H<sub>117</sub>N<sub>23</sub>O<sub>19</sub>S<sub>2</sub> [MH<sup>+</sup>]: 1612.841; observed: 1613.200. The concentration of peptide for NMR analysis was 3.2 mM.

### HPDFAspAgb

(Ac-Cys-Arg-Asp-Val-Thr-Val-<sup>D</sup>Pro-Gly-Orn-Agb-Ile-Leu-Gln-Cys-NH<sub>2</sub>[O] )

The peptide was synthesized using 252.7 mg (0.063 mmol) of NovaSyn®TGR resin. The synthesis gave 374.0 mg of resin (66.1% yield). The cleavage yielded 110.3 mg of crude peptide (>99% yield). Retention time on the analytical reverse phase HPLC was 30.2 minutes. Calculated for C<sub>66</sub>H<sub>117</sub>N<sub>23</sub>O<sub>19</sub>S<sub>2</sub> [MH<sup>+</sup>]: 1600.841; observed: 1601.116. The crude peptide was dissolved in 1 mM pH 8 phosphate, citrate and borate buffer (120 mL). Granulated charcoal (1063.4 mg) was added to the peptide solution [3]. After stirring over air for 3 hours, the cyclized peptide was purified by preparative RP-HPLC using a C4 (PLG9\_19) column to 95.4% purity (3.1 mg). The retention time of the cyclized peptide on the analytical RP-HPLC was 26.5 minutes. The identity of the peptide was confirmed by MALDI-TOF mass spectrometry. Calculated for C<sub>66</sub>H<sub>115</sub>N<sub>23</sub>O<sub>19</sub>S<sub>2</sub> [MH<sup>+</sup>]: 1598.825; observed: 1598.740. The concentration of peptide for NMR analysis was 3.9

mM.

### **HPDFGluAgb**

(Ac-Cys-Arg-Glu-Val-Thr-Val-<sup>D</sup>Pro-Gly-Orn-Agb-Ile-Leu-Gln-Cys-NH<sub>2</sub>[O] )

The peptide was synthesized using 265.3 mg (0.063 mmol) of NovaSyn®TGR resin. The synthesis gave 386.6 mg of resin (62.6% yield). The cleavage yielded 78.0 mg of crude peptide (93.4% yield). Retention time on the analytical reverse phase HPLC was 29.3 minutes. Calculated for C<sub>67</sub>H<sub>119</sub>N<sub>23</sub>O<sub>19</sub>S<sub>2</sub> [MH<sup>+</sup>]: 1614.857; observed: 1615.084. The crude peptide was dissolved in 1 mM pH 8 phosphate, citrate and borate buffer (90 mL). Granulated charcoal (752.0 mg) was added to the peptide solution [3]. After stirring over air for 2 hours, the cyclized peptide was purified by preparative RP-HPLC using a C4 (PLG9\_19) column to 95.0% purity (2.7 mg). The retention time of the cyclized peptide on the analytical RP-HPLC was 26.4 minutes. The identity of the peptide was confirmed by MALDI-TOF mass spectrometry. Calculated for C<sub>67</sub>H<sub>117</sub>N<sub>23</sub>O<sub>19</sub>S<sub>2</sub> [MH<sup>+</sup>]: 1612.841; observed: 1612.873. The concentration of peptide for NMR analysis was 3.3 mM.

### **HPDFAadAgb**

(Ac-Cys-Arg-Aad-Val-Thr-Val-<sup>D</sup>Pro-Gly-Orn-Agb-Ile-Leu-Gln-Cys-NH<sub>2</sub>[O] )

The peptide was synthesized using 251.0 mg (0.063 mmol) of NovaSyn®TGR resin. The synthesis gave 370.9 mg of resin (65.1% yield). The cleavage yielded 86.5 mg of crude peptide (>99% yield). Retention time on the analytical reverse phase HPLC was 29.4 minutes. Calculated for C<sub>68</sub>H<sub>121</sub>N<sub>23</sub>O<sub>19</sub>S<sub>2</sub> [MH<sup>+</sup>]: 1628.872; observed: 1629.138. The crude peptide was dissolved in 1 mM pH 8 phosphate, citrate and borate buffer (100 mL). Granulated charcoal (841.4 mg) was added to the peptide solution [3]. After stirring over air for 2.5 hours, the cyclized peptide was purified by preparative RP-HPLC using a C4 (PLG9\_19) column and a C18 (PLG16\_26) column to 96.4% purity (1.9 mg). The retention time of the cyclized peptide on the analytical RP-HPLC was 26.7 minutes. The identity of the peptide was confirmed by MALDI-TOF mass spectrometry. Calculated for C<sub>68</sub>H<sub>119</sub>N<sub>23</sub>O<sub>19</sub>S<sub>2</sub> [MH<sup>+</sup>]: 1626.857; observed: 1627.116. The concentration of peptide for NMR analysis was 2.3 mM.

### **HPDFAspArg**

(Ac-Cys-Arg-Asp-Val-Thr-Val-<sup>D</sup>Pro-Gly-Orn-Arg-Ile-Leu-Gln-Cys-NH<sub>2</sub>[O] )

The peptide was synthesized using 201.8 mg (0.050 mmol) of NovaSyn®TGR resin. The synthesis gave 340.7 mg of resin (97.6% yield). The cleavage yielded 86.4 mg of crude peptide (85.6% yield). Retention time on the analytical reverse phase HPLC was 30.6 minutes. Calculated for C<sub>67</sub>H<sub>119</sub>N<sub>23</sub>O<sub>19</sub>S<sub>2</sub> [MH<sup>+</sup>]: 1614.857; observed: 1615.095. The crude peptide was dissolved in 1 mM pH 8 phosphate, citrate and borate buffer (100 mL). Granulated charcoal (812.3 mg) was added to the peptide solution [3]. After stirring over air for 4 hours, the cyclized peptide was purified by preparative RP-HPLC using a C4 (PLG8\_18) column to 95.7% purity (7.2 mg). The retention time of the cyclized peptide on the analytical RP-HPLC was 26.8 minutes. The identity of the peptide was confirmed by MALDI-TOF mass spectrometry. Calculated for C<sub>67</sub>H<sub>117</sub>N<sub>23</sub>O<sub>19</sub>S<sub>2</sub> [MH<sup>+</sup>]:



1612.841; observed: 1612.754. The concentration of peptide for NMR analysis was 8.9 mM.

### **HPDFGluArg**

(Ac-Cys-Arg-Glu-Val-Thr-Val-<sup>D</sup>Pro-Gly-Orn-Arg-Ile-Leu-Gln-Cys-NH<sub>2</sub>[O] )

The peptide was synthesized using 200.5 mg (0.050 mmol) of NovaSyn®TGR resin. The synthesis gave 320.8 mg of resin (83.2% yield). The cleavage yielded 87.1 mg of crude peptide (>99%). Retention time on the analytical RP-HPLC was 29.9 minutes. Calculated for C<sub>68</sub>H<sub>121</sub>N<sub>23</sub>O<sub>19</sub>S<sub>2</sub> [MH<sup>+</sup>]: 1628.872; observed: 1629.085. The crude peptide was dissolved in 1 mM pH 8 phosphate, citrate and borate buffer (100 mL). Granulated charcoal (1204.3 mg) was added to the peptide solution [3]. After stirring over air for 4 hours, the cyclized peptide was purified by preparative RP-HPLC using a C4 (PLG8\_18) column and a C18 (PLG16\_26) column to 95.5% purity (4.7 mg). The retention time of the cyclized peptide on the analytical RP-HPLC was 26.7 minutes. The identity of the peptide was confirmed by MALDI-TOF mass spectrometry. Calculated for C<sub>68</sub>H<sub>119</sub>N<sub>23</sub>O<sub>19</sub>S<sub>2</sub> [MH<sup>+</sup>]: 1626.897; observed: 1626.805. The concentration of peptide for NMR analysis was 5.8 mM.

### **HPDFAadArg**

(Ac-Cys-Arg-Aad-Val-Thr-Val-<sup>D</sup>Pro-Gly-Orn-Arg-Ile-Leu-Gln-Cys-NH<sub>2</sub>[O] )

The peptide was synthesized using 201.8 mg (0.050 mmol) of NovaSyn®TGR resin. The synthesis gave 336.1 mg of resin (93.5% yield). The cleavage yielded 83.7 mg of crude peptide (97.5% yield). Retention time on the analytical RP-HPLC was 30.3 minutes. Calculated for C<sub>69</sub>H<sub>123</sub>N<sub>23</sub>O<sub>19</sub>S<sub>2</sub> [MH<sup>+</sup>]: 1642.888; observed: 1643.052. The crude peptide was dissolved in 1 mM pH 8 phosphate, citrate and borate buffer (100 mL). Granulated charcoal (848.5 mg) was added to the peptide solution [3]. After stirring over air for 4 hours, the cyclized peptide was purified by preparative RP-HPLC using a C4 (PLG8\_18) column to 95.7% purity (7.1 mg). The retention time of the cyclized peptide on the analytical RP-HPLC was 26.8 minutes. The identity of the peptide was confirmed by MALDI-TOF mass spectrometry. Calculated for C<sub>69</sub>H<sub>121</sub>N<sub>23</sub>O<sub>19</sub>S<sub>2</sub> [MH<sup>+</sup>]: 1640.872; observed: 1640.890. The concentration of peptide for NMR analysis was 8.7 mM.

### **HPDFAspAgh**

(Ac-Cys-Arg-Asp-Val-Thr-Val-<sup>D</sup>Pro-Gly-Orn-Agh-Ile-Leu-Gln-Cys-NH<sub>2</sub>[O] )

The peptide was synthesized using 201.9 mg (0.050 mmol) of NovaSyn®TGR resin. The synthesis gave 309.3 mg of resin (76.5% yield). The cleavage yielded 79.6 mg of crude peptide (94.5% yield). Retention time on the analytical RP-HPLC was 30.9 minutes. Calculated for C<sub>68</sub>H<sub>117</sub>N<sub>23</sub>O<sub>19</sub>S<sub>2</sub> [MH<sup>+</sup>]: 1628.872; observed: 1629.023. The crude peptide was dissolved in 1 mM pH 8 phosphate, citrate and borate buffer (90 mL). Granulated charcoal (669.0 mg) was added to the peptide solution [3]. After stirring over air for 4 hours, the cyclized peptide was purified by preparative RP-HPLC using a C4 (PLG8\_18) column to 95.9% purity (4.1 mg). The retention time of the cyclized peptide on the analytical RP-HPLC was 27.4 minutes. The identity of the peptide was confirmed by MALDI-TOF mass spectrometry. Calculated for C<sub>68</sub>H<sub>119</sub>N<sub>23</sub>O<sub>19</sub>S<sub>2</sub> [MH<sup>+</sup>]:

1626.857; observed: 1627.035. The concentration of peptide for NMR analysis was 5.6 mM.

### **HPDFGluAgh**

(Ac-Cys-Arg-Glu-Val-Thr-Val-<sup>D</sup>Pro-Gly-Orn-Agh-Ile-Leu-Gln-Cys-NH<sub>2</sub>[O] )

The peptide was synthesized using 204.6 mg (0.051 mmol) of NovaSyn®TGR resin. The synthesis gave 313.0 mg of resin (75.8% yield). The cleavage yielded 95.0 mg of crude peptide (>99%). Retention time on the analytical RP-HPLC was 30.3 minutes. Calculated for C<sub>69</sub>H<sub>119</sub>N<sub>23</sub>O<sub>19</sub>S<sub>2</sub> [MH<sup>+</sup>]: 1642.888; observed: 1643.075. The crude peptide was dissolved in 1 mM pH 8 phosphate, citrate and borate buffer (100 mL). Granulated charcoal (856.0 mg) was added to the peptide solution [3]. After stirring over air for 2 hours, the cyclized peptide was purified by preparative RP-HPLC using a C4 (PLG8\_18) column to 95.3% purity (4.7 mg). The retention time of the cyclized peptide on the analytical RP-HPLC was 27.2 minutes. The identity of the peptide was confirmed by MALDI-TOF mass spectrometry. Calculated for C<sub>69</sub>H<sub>121</sub>N<sub>23</sub>O<sub>19</sub>S<sub>2</sub> [MH<sup>+</sup>]: 1640.872; observed: 1641.028. The concentration of peptide for NMR analysis was 4.1 mM.

### **HPDFAadAgh**

(Ac-Cys-Arg-Aad-Val-Thr-Val-<sup>D</sup>Pro-Gly-Orn-Agh-Ile-Leu-Gln-Cys-NH<sub>2</sub>[O] )

The peptide was synthesized using 207.2 mg (0.052 mmol) of NovaSyn®TGR resin. The synthesis gave 319.1 mg of resin (76.9% yield). The cleavage yielded 88.6 mg of crude peptide (>99% yield). Retention time on the analytical reverse phase HPLC was 30.0 minutes. Calculated for C<sub>70</sub>H<sub>121</sub>N<sub>23</sub>O<sub>19</sub>S<sub>2</sub> [MH<sup>+</sup>]: 1656.904; observed: 1657.130. The crude peptide was dissolved in 1 mM pH 8 phosphate, citrate and borate buffer (100 mL). Granulated charcoal (886.2 mg) was added to the peptide solution [3]. After stirring over air for 4 hours, the cyclized peptide was purified by preparative RP-HPLC using a C4 (PLG9\_19) column to 95.8% purity (4.6 mg). The retention time of the cyclized peptide on the analytical RP-HPLC was 27.3 minutes. The identity of the peptide was confirmed by MALDI-TOF mass spectrometry. Calculated for C<sub>70</sub>H<sub>123</sub>N<sub>23</sub>O<sub>19</sub>S<sub>2</sub> [MH<sup>+</sup>]: 1654.888; observed: 1654.935. The concentration of peptide for NMR analysis was 5.6 mM.

### *NMR Spectroscopy*

NMR samples were prepared by dissolving lyophilized purified peptides (purity greater than 95%) in H<sub>2</sub>O/D<sub>2</sub>O (9:1 ratio by volume), 50 mM sodium deuterioacetate buffer at pH 5.5 (uncorrected). Concentrations of all peptides were 1.4-8.9 mM. 2,2-Dimethyl-2-silapentane-5-sulfonate (DSS) was added to the samples as an internal reference. NMR experiments were performed on a Bruker AV III 800 MHz spectrometer at 298K. Phase-sensitive TOCSY [4], DQF-COSY [5], and ROESY [6] experiments were performed by collecting 2048 points in *f*<sub>2</sub> and 256-512 points in *f*<sub>1</sub>. Solvent suppression was achieved by the WATERGATE solvent suppression sequence [7, 8]. TOCSY and ROESY experiments employed a spin locking field of 10 kHz. Mixing times of 60 msec and 200 msec were used for the TOCSY and ROESY experiments, respectively. The specific sequence assignment was performed based on TOCSY, DQF-COSY, and ROESY data.

### <sup>3</sup>J<sub>NH<sub>α</sub></sub> Coupling Constants

The <sup>3</sup>J<sub>NH<sub>α</sub></sub> spin-spin coupling constant for the residues in the peptides was derived from the DQF-COSY spectra. The absorptive (v<sub>a</sub>) and dispersive (v<sub>d</sub>) values were obtained along the *f*<sub>2</sub> axis. The <sup>3</sup>J<sub>NH<sub>α</sub></sub> coupling constant was derived from the square root of the single real root of equation 1 [9].

$$J^6 - v_d^2 J^4 + \left( -\frac{9}{4} v_a^4 + \frac{3}{2} v_a^2 v_d^2 + \frac{3}{4} v_d^4 \right) J^2 + \frac{81}{64} v_a^6 - \frac{9}{16} v_a^4 v_d^2 - \frac{21}{32} v_a^2 v_d^4 - \frac{1}{16} v_d^6 + \frac{v_d^8}{64 v_a^2} = 0 \quad (\text{equation 1})$$

### Distance Derivation from NOE Intergration

The NOE cross peaks of all peptides were assigned from the corresponding ROESY spectra. The interproton distances were derived from the NOE signal intensity following equation 2. The integration for the NOE cross peaks was based on a Gaussian peak model. The distance between the two β-hydrogen atoms on the proline side chain in the peptide was set as the standard (1.77 Å) to derived the interproton distance (R).

$$R_{NOE} = 1.77 \times 10^{-10} \times \left( \frac{I_{standard}}{I_{NOE}} \right)^{\frac{1}{6}} \quad (\text{equation 2})$$

The NOEs were grouped into three categories based on distance: strong NOEs for distances shorter than 2.5 Å, medium NOEs for distances between 2.5 Å and 3.5 Å, and weak NOEs for distances longer than 3.5 Å. The Wüthrich diagrams were used to depict the backbone NOE connectivities involving the α protons and amide protons for the peptides (Figures S39-S50). The strength of the NOEs in these diagrams was depicted by different line widths; the thicker the line, the stronger the NOE.

### Chemical Shift Deviation

The Hα chemical shift deviation for each residue in the experimental peptide (ΔδHα(exp)) was the difference between the Hα chemical shift in the experimental peptide (δHα<sub>(exp)</sub>) and the corresponding Hα chemical shift in the fully unfolded reference peptide (δHα<sub>(U)</sub>) (equation 3). The Hα chemical shift deviation for each residue in the fully folded reference peptide (ΔδHα(F)) was the difference between the Hα chemical shift in the fully folded reference peptide (δHα<sub>(F)</sub>) and the corresponding Hα chemical shift in the fully unfolded reference peptide (equation 4). The HPDFZbbAgx peptide was assumed to be the fully folded reference peptide and the HPDUZbbAgx peptide to be the fully unfolded reference peptide.

$$\Delta\delta H\alpha(\text{exp}) = \delta H\alpha_{(\text{exp})} - \delta H\alpha_{(U)} \quad (\text{equation 3})$$

$$\Delta\delta H\alpha(F) = \delta H\alpha_{(F)} - \delta H\alpha_{(U)} \quad (\text{equation 4})$$

### *Fraction Folded Population and Folding Free Energy*

The fraction folded population and folding free energy ( $\Delta G_{\text{fold}}$ ) were derived from  $H\alpha$  chemical shift values, assuming a two-state system model for a  $\beta$ -hairpin in aqueous solution [10]. The fraction folded population and  $\Delta G_{\text{fold}}$  for each residue were derived by using the equations 5 and 6, respectively. For each peptide, the fraction folded population and  $\Delta G_{\text{fold}}$  were obtained by averaging the corresponding values for the residues at positions 2, 3, 9 and 10.

$$\text{Fraction folded (\%)} = \frac{\delta H\alpha(\text{exp}) - \delta H\alpha(\text{U})}{\delta H\alpha(\text{F}) - \delta H\alpha(\text{U})} \times 100\% \quad (\text{equation 5})$$

$$\Delta G_{\text{fold}} = -RT \ln \left( \frac{\delta H\alpha(\text{exp}) - \delta H\alpha(\text{U})}{\delta H\alpha(\text{F}) - \delta H\alpha(\text{exp})} \right) \quad (\text{equation 6})$$

### *Double Mutant Cycle Analysis*

The interaction free energy ( $\Delta G_{\text{int}}$ ) between charged residues Zbb and Agx in the HPDZbbAgx peptides was derived from double mutant cycle analysis using equation 7 [11]. The charged residues at positions 2 and 9 were individually substituted with Ala to give the reference peptides HPDAlaAgx and HPDZbbAla, respectively. The HPDAlaAla peptide was used as the reference peptide with Ala incorporated at both positions 2 and 9.

$$\begin{aligned} \Delta G_{\text{int}} &= (\Delta G_{\text{HPDZbbAgx}} - \Delta G_{\text{HPDAlaAla}}) - (\Delta G_{\text{HPDAlaAgx}} - \Delta G_{\text{HPDAlaAla}}) \\ &\quad - (\Delta G_{\text{HPDZbbAla}} - \Delta G_{\text{HPDAlaAla}}) \\ &= \Delta G_{\text{HPDZbbAgx}} - \Delta G_{\text{HPDAlaAgx}} - \Delta G_{\text{HPDZbbAla}} + \Delta G_{\text{HPDAlaAla}} \end{aligned} \quad (\text{equation 7})$$

## References

1. Atherton, E.; Fox, H.; Harkiss, D.; Logan, C. J.; Sheppard, R. C.; Williams, B. J. A mild procedure for solid phase peptide synthesis: use of fluorenylmethoxycarbonylamino-acids. *J. Chem. Soc., Chem. Commun.* **1978**, 537-539.
2. Fields, G. B.; Noble, R. L. Solid phase peptide synthesis utilizing 9-fluorenylmethoxycarbonyl amino acids. *Int. J. Pept. Protein Res.* **1990**, 35, 161-214.
3. Volkmer-Engert, R.; Landgraf, C.; Schneider-Mergener, J. Charcoal surface-assisted catalysis of intramolecular disulfide bond formation in peptides. *J. Pept. Res.* **1998**, 51, 365.
4. Bax, A., and Davis, D. G. MLEV-17-based two-dimensional homonuclear magnetization transfer spectroscopy. *J. Magn. Reson.* **1985**, 65, 355-360.
5. Aue, W. P.; Bartholdi, E.; Ernst, R. R. Two-dimensional spectroscopy. Application to nuclear magnetic resonance. *J. Chem. Phys.* **1976**, 64, 2229-2246.
6. Aksel A. Bothner-By, R. L. S., Jumea Lee, Christopher D. Warren, R. W. Jeanloz Structure determination of a tetrasaccharide: transient nuclear Overhauser effects in the rotating frame. *J. Am. Chem. Soc.* **1984**, 106, 811-813.
7. Piotto, M.; Saudek, V.; Sklenar, V. Gradient-tailored excitation for single-quantum NMR spectroscopy of aqueous solutions. *J. Biomol. NMR* **1992**, 2, 661-665.
8. Sklenar, V.; Piotto, M.; Leppik, R.; Saudek, V. Gradient-tailored water suppression for <sup>1</sup>H-<sup>15</sup>N HSQC experiments optimized to retain full sensitivity. *J. Magn. Reson. Ser. A* **1993**, 102, 241-245.
9. Kim, Y.; Prestegard, J. H. Measurement of vicinal couplings from cross peaks in COSY spectra. *J. Magn. Reson.* **1989**, 84, 9-13.
10. Syud, F. A.; Espinosa, J. F.; Gellman, S. H. NMR-based quantification of  $\beta$ -sheet populations in aqueous solution through use of reference peptides for the folded and unfolded states. *J. Am. Chem. Soc.* **1999**, 121, 11577-11578.
11. Horovitz, A. Double-mutant cycles: a powerful tool for analyzing protein structure and function. *Fold. Des.* **1996**, 1, R121-R126.
